# Supplementary material for: Electrochemically enabled functionalization of indoles or anilines for the synthesis of hexafluoroisopropoxy indole and aniline derivatives
Source: Royal Society of Chemistry journal article supplement (doi:10.1039/d0ob00157k), 2020-01-01

# Supporting Information

## Electrochemically enabled functionalization of indole or aniline derivatives with hexafluoroisopropanol

Zu-Yu Mo,<sup>a</sup> Xin-Yu Wang,<sup>a</sup> Yu-Zhen Zhang,<sup>a</sup> Li Yang,<sup>\*,b</sup> Hai-Tao Tang<sup>a</sup> and Ying-Ming Pan <sup>\*,a</sup>

<sup>a</sup>State Key Laboratory for Chemistry and Molecular Engineering of Medicinal Resources, School of Chemistry and Pharmaceutical Sciences of Guangxi Normal University, Guilin 541004, People's Republic of China.

<sup>b</sup>Guangxi Key Laboratory of Special Non-wood Forest Cultivation and Utilization, Guangxi Zhuang Autonomous Region Forestry Research Institute, Nanning, 530002, P. R. of China.

\* E-mail: [panym@mailbox.gxnu.edu.cn](mailto:panym@mailbox.gxnu.edu.cn); [yangli2828@yeah.net](mailto:yangli2828@yeah.net)

### Table of Contents

|                                                                                                           |    |
|-----------------------------------------------------------------------------------------------------------|----|
| 1. General Information .....                                                                              | 2  |
| 2. Chemical experiment procedure .....                                                                    | 2  |
| 4. General procedure for cyclic voltammetry (CV) .....                                                    | 3  |
| 5. The HRMS spectra of compound <b>3a</b> .....                                                           | 4  |
| 6. Characterization data for the compound <b>2g</b> .....                                                 | 4  |
| 7. Study on anti-tumor activity .....                                                                     | 10 |
| 8. Characterization data for the fluoroalkylated indoles and anilines. ....                               | 12 |
| 9. Copies of <sup>1</sup> H NMR and <sup>13</sup> C NMR for the fluoroalkylated indoles and anilines..... | 19 |

## 1. General Information

Unless otherwise noted, all reagents and solvents were obtained commercially and used without further purification. Column chromatography on silica gel (300-400 mesh) was carried out using technical grade 60-90 °C petroleum ether and analytical grade EtOAc (without further purification).  $^1\text{H}$  and  $^{13}\text{C}$  spectra were recorded on a 400 MHz or 500 MHz spectrometer. Chemical shifts were reported in ppm.  $^1\text{H}$  NMR spectra were referenced to  $\text{CDCl}_3$  (7.26 ppm) and  $(\text{CD}_3)_2\text{CO}$  (2.84 ppm and 2.05 ppm), and  $^{13}\text{C}$ -NMR spectra were referenced to  $\text{CDCl}_3$  (77.0 ppm) and  $(\text{CD}_3)_2\text{CO}$  (206.26 ppm and 29.84 ppm). Peak multiplicities were designated by the following abbreviations: s, singlet; d, doublet; t, triplet; qui, quintet; m, multiplet; brs, broad singlet and J, coupling constant in Hz. HRMS spectra were recorded with Micromass QTOF2 Quadrupole/Time-of-Flight Tandem mass spectrometer using electron spray ionization.

## 2. Chemical experiment procedure

### 2.1 Synthesis of fluoroalkylated indoles.

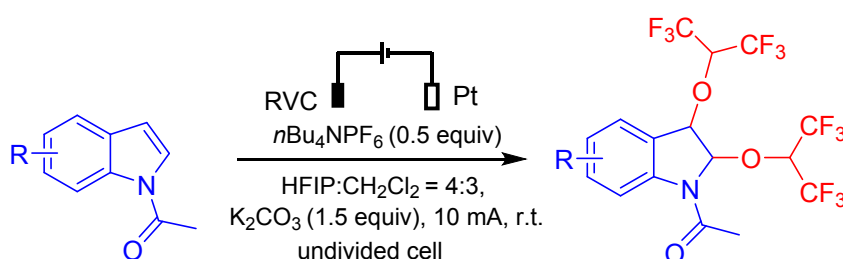

The *N*-acetylindoles (0.5 mmol),  $\text{K}_2\text{CO}_3$  (0.75 mmol, 1.5 equiv) and  $n\text{Bu}_4\text{PF}_6$  (0.25 mmol, 0.5 equiv) were placed in a 25 mL four-necked round-bottomed flask. The flask was equipped with an RVC (100 PPI, 1 cm x 1 cm x 1.2 cm) anode and a platinum plate (1 cm x 1 cm) cathode. HFIP (4.0 mL) and  $\text{CH}_2\text{Cl}_2$  (3.0 mL) were added. The electrolysis was carried out at room temperature, which using a constant current of 10 mA until complete consumption of the substrate (monitored by TLC, about 6.0 h). The solvent was concentrated under reduced pressure. Purification with silica gel column chromatography using ethyl cetate/petroleum ether to afford the desired products.

### 2.2 Synthesis of fluoroalkylated anilines.

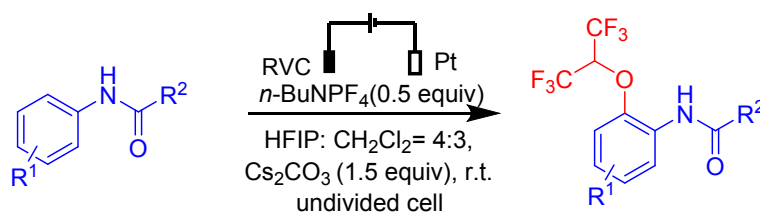

The anilines (0.5 mmol), Cs<sub>2</sub>CO<sub>3</sub> (0.75 mmol, 1.5 equiv) and *n*Bu<sub>4</sub>PF<sub>6</sub> (0.25 mmol, 0.5 equiv) were placed in a 25 mL four-necked round-bottomed flask. The flask was equipped with an RVC (100 PPI, 1 cm x 1 cm x 1.2 cm) anode and a platinum plate (1 cm x 1 cm) cathode. HFIP (4.0 mL) and CH<sub>2</sub>Cl<sub>2</sub> (3.0 mL) were added. The electrolysis was carried out at room temperature, which using a constant current of 10 mA until complete consumption of the substrate (monitored by TLC, about 8.0 h). The solvent was concentrated under reduced pressure. Purification with silica gel column chromatography using ethyl acetate/petroleum ether to afford the desired products.

### 3. Control experiments.

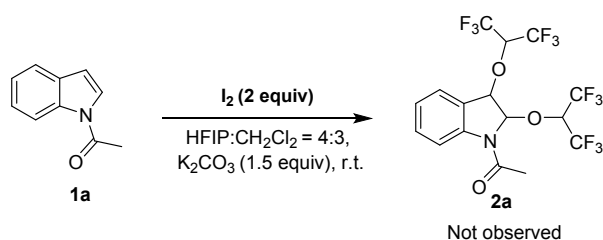

A reaction of **1a** with HFIP was achieved in the presence of I<sub>2</sub>, but the desired product **2a** was not observed. This finding suggested that I<sub>2</sub> was not involved in the reaction.

### 4. General procedure for cyclic voltammetry (CV)

Cyclic voltammetry was performed in a threeelectrode cell connected to a schlenk line under nitrogen at room temperature. The working electrode was a steady glassy carbon disk electrode, the counter electrode a platinum wire. The reference was an Ag/AgCl electrode submerged in saturated aqueous KCl solution, and separated from reaction by a salt bridge. 8.0 mL of HFIP and 2.0 mL of CH<sub>2</sub>Cl<sub>2</sub> containing 0.1 M LiClO<sub>4</sub> were poured into the electrochemical cell in all experiments. The scan rate is 0.1 V/s, ranging from 0 V to 1.6 V.

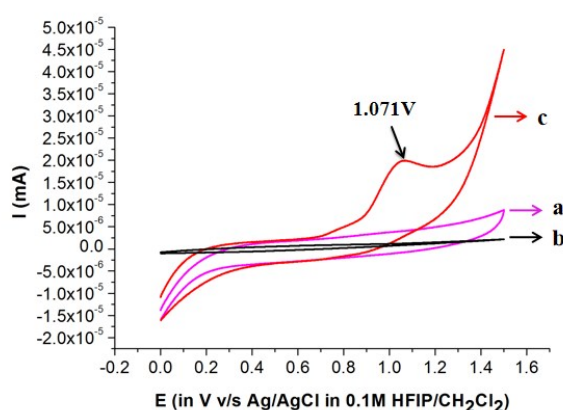

**Figure S1.** Cyclic voltammograms of reactants and their mixtures in 0.1 M LiClO<sub>4</sub>, HFIP/CH<sub>2</sub>Cl<sub>2</sub> using a glassy carbon disk working electrode (diameter, 3 mm), Pt disk and Ag/AgCl (0.1 M in HFIP/CH<sub>2</sub>Cl<sub>2</sub>) as counter and reference electrode at 100 mV/s scan rate: (a) *n*Bu<sub>4</sub>PF<sub>6</sub> (2 mmol/L), (b) indole **1a** (10 mmol/L), (c) *n*Bu<sub>4</sub>PF<sub>6</sub> (2 mmol/L) + indole **1a** (10 mmol/L).

## 5. The HRMS spectra of compound 3a

5a\_191219111743 #2 RT: 0.01 AV: 1 NL: 3.39E4  
T: FTMS + p ESI Full ms [250.00-400.00]

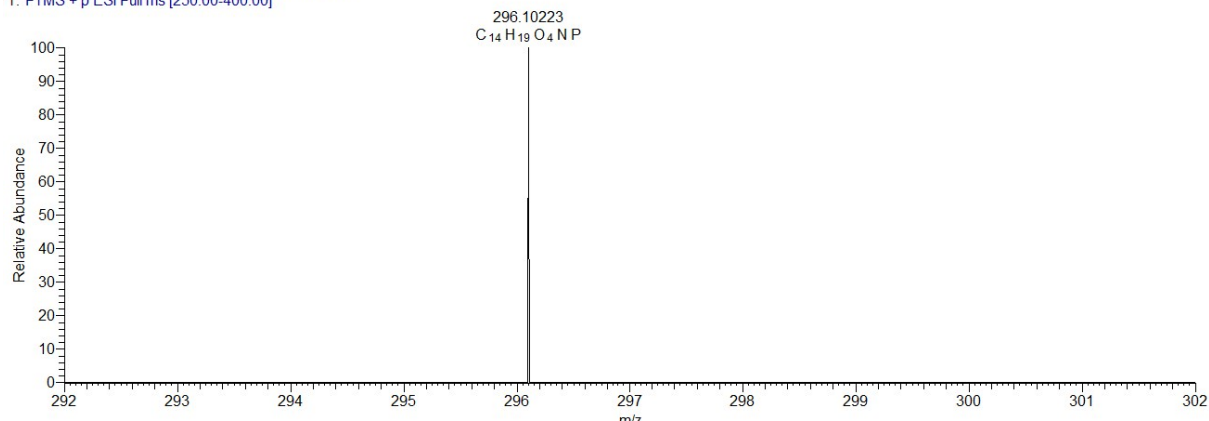

Figure S2. The HRMS spectra of compound 3a.

## 6. Characterization data for the compound 2g

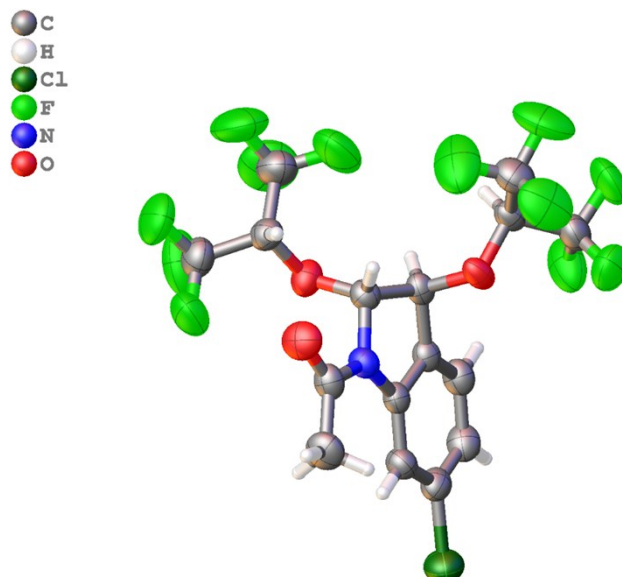

Figure S3. The characterization of the compound 2g (CCDC: 1999778).

### Table S1 Crystal data and structure refinement for compound 2g.

|                     |                                                                   |
|---------------------|-------------------------------------------------------------------|
| Identification code | compound 2g                                                       |
| Empirical formula   | C <sub>16</sub> H <sub>10</sub> ClF <sub>12</sub> NO <sub>3</sub> |
| Formula weight      | 527.70                                                            |
| Temperature/K       | 293(2)                                                            |
| Crystal system      | monoclinic                                                        |
| Space group         | P2 <sub>1</sub> /c                                                |
| a/Å                 | 7.7099(6)                                                         |
| b/Å                 | 16.5285(15)                                                       |
| c/Å                 | 15.8165(16)                                                       |
| α/°                 | 90                                                                |

|                                               |                                                               |
|-----------------------------------------------|---------------------------------------------------------------|
| $\beta/^\circ$                                | 94.189(7)                                                     |
| $\gamma/^\circ$                               | 90                                                            |
| Volume/ $\text{\AA}^3$                        | 2010.2(3)                                                     |
| Z                                             | 4                                                             |
| $\rho_{\text{calc}}/\text{g/cm}^3$            | 1.744                                                         |
| $\mu/\text{mm}^{-1}$                          | 0.319                                                         |
| F(000)                                        | 1048.0                                                        |
| Crystal size/ $\text{mm}^3$                   | $0.23 \times 0.21 \times 0.16$                                |
| Radiation                                     | Mo K $\alpha$ ( $\lambda = 0.71073$ )                         |
| $2\Theta$ range for data collection/ $^\circ$ | 7.126 to 52                                                   |
| Index ranges                                  | $-9 \leq h \leq 8, -19 \leq k \leq 20, -19 \leq l \leq 19$    |
| Reflections collected                         | 11847                                                         |
| Independent reflections                       | 3944 [ $R_{\text{int}} = 0.0312, R_{\text{sigma}} = 0.0278$ ] |
| Data/restraints/parameters                    | 3944/0/299                                                    |
| Goodness-of-fit on $F^2$                      | 1.033                                                         |
| Final R indexes [ $I \geq 2\sigma(I)$ ]       | $R_1 = 0.0553, wR_2 = 0.1421$                                 |
| Final R indexes [all data]                    | $R_1 = 0.0717, wR_2 = 0.1559$                                 |
| Largest diff. peak/hole / $e \text{\AA}^{-3}$ | 0.28/-0.31                                                    |

**Table S2 Fractional Atomic Coordinates ( $\times 10^4$ ) and Equivalent Isotropic Displacement Parameters ( $\text{\AA}^2 \times 10^3$ ) for compound **2g**.  $U_{\text{eq}}$  is defined as 1/3 of of the trace of the orthogonalised  $U_{ij}$  tensor.**

| Atom | x          | y          | z           | U(eq)     |
|------|------------|------------|-------------|-----------|
| Cl1  | 4120.6(12) | 3569.0(5)  | 521.1(6)    | 75.9(3)   |
| F1   | -4298(3)   | 6908.2(17) | 1525.0(17)  | 112.4(8)  |
| F2   | -2709(4)   | 7904.1(18) | 1355(2)     | 132.2(11) |
| F3   | -3833(4)   | 7734.5(18) | 2530.7(17)  | 127.5(10) |
| F4   | -351(3)    | 5905.1(15) | 3145.2(14)  | 102.8(8)  |
| F5   | -2886(3)   | 5687.1(13) | 2556.4(15)  | 102.1(7)  |
| F6   | -2511(3)   | 6554.2(15) | 3549.9(13)  | 101.8(7)  |
| F7   | 582(4)     | 8785.2(18) | 1248.9(17)  | 131.0(11) |
| F8   | 1649(5)    | 9744.7(15) | 544(2)      | 143.7(12) |
| F9   | 3281(4)    | 9019.3(18) | 1363.6(17)  | 137.1(11) |
| F10  | 3368(3)    | 9338.9(13) | -783.5(15)  | 107.2(8)  |
| F11  | 3647(4)    | 8108.3(15) | -1073.5(16) | 111.7(9)  |
| F12  | 5099(3)    | 8608.5(19) | -9.2(17)    | 122.3(10) |
| O1   | -771(2)    | 6529.2(11) | 1537.4(10)  | 49.4(4)   |
| O2   | 2413(2)    | 7633.5(11) | 438.4(11)   | 54.6(5)   |
| O3   | 375(3)     | 7149.6(13) | -1210.2(11) | 66.9(6)   |
| N1   | 1241(3)    | 6401.3(12) | -81.4(12)   | 45.2(5)   |
| C1   | 970(3)     | 7092.9(15) | 465.1(15)   | 44.9(6)   |

|     |          |            |             |          |
|-----|----------|------------|-------------|----------|
| C2  | 996(3)   | 6726.4(15) | 1360.4(14)  | 44.1(5)  |
| C3  | 1963(3)  | 5949.4(15) | 1269.9(14)  | 42.6(5)  |
| C4  | 2699(3)  | 5440.9(17) | 1889.4(16)  | 52.3(6)  |
| C5  | 3389(4)  | 4703.5(17) | 1658.4(18)  | 57.0(7)  |
| C6  | 3321(3)  | 4502.3(16) | 811.3(17)   | 52.6(6)  |
| C7  | 2636(3)  | 5012.2(15) | 170.8(16)   | 50.1(6)  |
| C8  | 1971(3)  | 5751.4(14) | 411.3(14)   | 41.5(5)  |
| C9  | 911(3)   | 6496.2(17) | -944.4(15)  | 49.3(6)  |
| C10 | 1229(5)  | 5810.3(19) | -1520.9(16) | 65.8(8)  |
| C11 | 2077(4)  | 8405.6(15) | 97.2(17)    | 53.4(6)  |
| C12 | 3584(5)  | 8618.2(19) | -437(2)     | 69.6(8)  |
| C13 | 1913(6)  | 9004(2)    | 813(2)      | 83.9(10) |
| C14 | -1473(3) | 6906.7(15) | 2229.4(15)  | 46.4(6)  |
| C15 | -1829(4) | 6260(2)    | 2870.4(19)  | 64.5(8)  |
| C16 | -3098(4) | 7366(2)    | 1911(2)     | 72.4(9)  |

**Table S3 Anisotropic Displacement Parameters ( $\text{\AA}^2 \times 10^3$ ) for compound 2g. The Anisotropic displacement factor exponent takes the form:  $-2\pi^2[h^2a^*2U_{11}+2hka^*b^*U_{12}+\dots]$**

| Atom | $U_{11}$  | $U_{22}$  | $U_{33}$  | $U_{23}$  | $U_{13}$  | $U_{12}$  |
|------|-----------|-----------|-----------|-----------|-----------|-----------|
| Cl1  | 80.6(6)   | 56.9(5)   | 92.0(6)   | 3.1(4)    | 18.0(4)   | 16.6(4)   |
| F1   | 54.5(12)  | 158(2)    | 120.5(18) | -19.7(16) | -20.5(12) | 6.7(13)   |
| F2   | 102.0(19) | 133(2)    | 163(2)    | 75(2)     | 18.6(17)  | 38.7(16)  |
| F3   | 118(2)    | 146(2)    | 121.0(19) | -34.9(16) | 25.4(15)  | 65.2(18)  |
| F4   | 87.5(15)  | 128.7(19) | 94.6(14)  | 52.8(14)  | 22.2(11)  | 23.9(13)  |
| F5   | 106.3(18) | 81.9(14)  | 120.7(18) | -3.7(12)  | 26.6(13)  | -35.6(13) |
| F6   | 109.0(18) | 130.5(18) | 72.7(13)  | -2.0(12)  | 53.3(12)  | -7.0(14)  |
| F7   | 150(3)    | 143(2)    | 108.3(19) | -48.6(16) | 66.7(18)  | -17.0(19) |
| F8   | 217(4)    | 65.7(15)  | 153(2)    | -19.7(15) | 46(2)     | 27.8(17)  |
| F9   | 165(3)    | 146(2)    | 96.0(17)  | -47.9(16) | -21.0(18) | -22(2)    |
| F10  | 136(2)    | 82.9(14)  | 105.3(16) | 39.4(12)  | 23.6(14)  | -14.5(13) |
| F11  | 126(2)    | 112.7(18) | 105.1(17) | -22.6(14) | 64.8(15)  | -22.4(15) |
| F12  | 68.7(14)  | 186(3)    | 111.2(18) | 47.0(17)  | 3.5(13)   | -24.0(15) |
| O1   | 41.3(9)   | 64.3(11)  | 43.5(9)   | -16.0(8)  | 9.0(7)    | -7.3(8)   |
| O2   | 48.9(11)  | 52.5(10)  | 61.8(11)  | 12.6(8)   | 0.5(8)    | -2.2(8)   |
| O3   | 81.3(15)  | 70.6(13)  | 47.0(10)  | 9.5(9)    | -7.4(9)   | 10.3(11)  |
| N1   | 47.4(12)  | 50.9(12)  | 37.5(10)  | 1.8(8)    | 4.5(8)    | 4.5(9)    |
| C1   | 40.9(13)  | 49.9(14)  | 43.9(12)  | 0.5(10)   | 2.5(10)   | 2.3(11)   |
| C2   | 39.9(13)  | 54.0(14)  | 38.6(12)  | -1.9(10)  | 4.1(9)    | -5.6(11)  |
| C3   | 36.7(12)  | 51.3(14)  | 39.8(12)  | 0.9(10)   | 2.8(9)    | -3.4(10)  |
| C4   | 49.9(15)  | 65.6(17)  | 40.8(13)  | 6.0(11)   | -0.4(11)  | -0.6(12)  |

|     |          |          |          |           |          |          |
|-----|----------|----------|----------|-----------|----------|----------|
| C5  | 48.7(15) | 63.6(17) | 58.2(16) | 13.6(13)  | 0.0(12)  | 5.8(13)  |
| C6  | 44.5(14) | 51.3(15) | 62.8(16) | 7.0(12)   | 7.9(12)  | 2.6(11)  |
| C7  | 52.0(15) | 53.5(15) | 45.8(13) | -1.5(11)  | 9.1(11)  | 1.9(12)  |
| C8  | 36.6(12) | 49.5(13) | 38.4(11) | 3.2(10)   | 4.1(9)   | -3.0(10) |
| C9  | 46.2(14) | 62.9(16) | 38.3(12) | 5.1(11)   | 0.2(10)  | -3.5(12) |
| C10 | 79(2)    | 78(2)    | 39.6(14) | -5.1(13)  | -0.2(13) | -1.1(16) |
| C11 | 62.4(17) | 46.2(14) | 51.5(14) | 3.9(11)   | 4.4(12)  | 2.1(12)  |
| C12 | 79(2)    | 64.9(19) | 65.8(19) | 11.8(15)  | 9.2(16)  | -8.3(16) |
| C13 | 107(3)   | 67(2)    | 79(2)    | -7.9(17)  | 20(2)    | 1(2)     |
| C14 | 43.1(14) | 55.0(14) | 41.7(12) | -11.5(10) | 7.3(10)  | -3.7(11) |
| C15 | 60.9(19) | 74(2)    | 60.9(17) | -2.9(14)  | 19.0(14) | -5.6(16) |
| C16 | 62(2)    | 80(2)    | 75(2)    | -4.9(17)  | 10.9(16) | 13.5(17) |

**Table S4 Bond Lengths for compound 2g.**

| Atom | Atom | Length/Å | Atom | Atom | Length/Å |
|------|------|----------|------|------|----------|
| C11  | C6   | 1.735(3) | O3   | C9   | 1.220(3) |
| F1   | C16  | 1.311(4) | N1   | C1   | 1.457(3) |
| F2   | C16  | 1.301(4) | N1   | C8   | 1.419(3) |
| F3   | C16  | 1.316(4) | N1   | C9   | 1.379(3) |
| F4   | C15  | 1.326(4) | C1   | C2   | 1.539(3) |
| F5   | C15  | 1.322(4) | C2   | C3   | 1.497(4) |
| F6   | C15  | 1.323(3) | C3   | C4   | 1.381(3) |
| F7   | C13  | 1.327(5) | C3   | C8   | 1.397(3) |
| F8   | C13  | 1.308(4) | C4   | C5   | 1.389(4) |
| F9   | C13  | 1.318(5) | C5   | C6   | 1.378(4) |
| F10  | C12  | 1.317(4) | C6   | C7   | 1.392(4) |
| F11  | C12  | 1.317(4) | C7   | C8   | 1.389(4) |
| F12  | C12  | 1.306(4) | C9   | C10  | 1.487(4) |
| O1   | C2   | 1.448(3) | C11  | C12  | 1.526(4) |
| O1   | C14  | 1.402(3) | C11  | C13  | 1.515(4) |
| O2   | C1   | 1.430(3) | C14  | C15  | 1.512(4) |
| O2   | C11  | 1.402(3) | C14  | C16  | 1.519(4) |

**Table S5 Bond Angles for compound 2g.**

| Atom | Atom | Atom | Angle/°    | Atom | Atom | Atom | Angle/°  |
|------|------|------|------------|------|------|------|----------|
| C14  | O1   | C2   | 118.24(18) | C13  | C11  | C12  | 111.8(3) |
| C11  | O2   | C1   | 117.2(2)   | F10  | C12  | F11  | 105.7(3) |
| C8   | N1   | C1   | 109.66(18) | F10  | C12  | C11  | 111.1(3) |
| C9   | N1   | C1   | 118.3(2)   | F11  | C12  | C11  | 110.3(3) |
| C9   | N1   | C8   | 131.8(2)   | F12  | C12  | F10  | 107.9(3) |

|    |     |     |            |     |     |     |          |
|----|-----|-----|------------|-----|-----|-----|----------|
| O2 | C1  | N1  | 109.1(2)   | F12 | C12 | F11 | 107.9(3) |
| O2 | C1  | C2  | 108.37(18) | F12 | C12 | C11 | 113.5(3) |
| N1 | C1  | C2  | 104.13(19) | F7  | C13 | C11 | 108.7(3) |
| O1 | C2  | C1  | 108.50(19) | F8  | C13 | F7  | 108.5(4) |
| O1 | C2  | C3  | 107.93(19) | F8  | C13 | F9  | 107.2(4) |
| C3 | C2  | C1  | 102.88(19) | F8  | C13 | C11 | 112.8(3) |
| C4 | C3  | C2  | 129.5(2)   | F9  | C13 | F7  | 105.9(3) |
| C4 | C3  | C8  | 121.1(2)   | F9  | C13 | C11 | 113.6(3) |
| C8 | C3  | C2  | 109.3(2)   | O1  | C14 | C15 | 107.9(2) |
| C3 | C4  | C5  | 119.5(2)   | O1  | C14 | C16 | 108.6(2) |
| C6 | C5  | C4  | 118.7(2)   | C15 | C14 | C16 | 113.0(2) |
| C5 | C6  | C11 | 118.9(2)   | F4  | C15 | C14 | 109.8(2) |
| C5 | C6  | C7  | 123.2(2)   | F5  | C15 | F4  | 107.3(3) |
| C7 | C6  | C11 | 118.0(2)   | F5  | C15 | F6  | 107.3(3) |
| C8 | C7  | C6  | 117.5(2)   | F5  | C15 | C14 | 113.0(3) |
| C3 | C8  | N1  | 109.1(2)   | F6  | C15 | F4  | 106.2(3) |
| C7 | C8  | N1  | 130.9(2)   | F6  | C15 | C14 | 112.8(3) |
| C7 | C8  | C3  | 120.0(2)   | F1  | C16 | F3  | 106.6(3) |
| O3 | C9  | N1  | 118.4(2)   | F1  | C16 | C14 | 113.7(3) |
| O3 | C9  | C10 | 122.1(2)   | F2  | C16 | F1  | 105.6(3) |
| N1 | C9  | C10 | 119.6(2)   | F2  | C16 | F3  | 108.7(3) |
| O2 | C11 | C12 | 107.2(2)   | F2  | C16 | C14 | 109.9(3) |
| O2 | C11 | C13 | 109.2(2)   | F3  | C16 | C14 | 111.9(3) |

**Table S6 Torsion Angles for compound 2g.**

| A   | B   | C   | D   | Angle/°    | A  | B  | C  | D   | Angle/°   |
|-----|-----|-----|-----|------------|----|----|----|-----|-----------|
| C11 | C6  | C7  | C8  | 178.85(19) | C4 | C3 | C8 | N1  | -176.1(2) |
| O1  | C2  | C3  | C4  | -80.1(3)   | C4 | C3 | C8 | C7  | 3.7(4)    |
| O1  | C2  | C3  | C8  | 96.7(2)    | C4 | C5 | C6 | C11 | -178.1(2) |
| O1  | C14 | C15 | F4  | 62.2(3)    | C4 | C5 | C6 | C7  | 1.8(4)    |
| O1  | C14 | C15 | F5  | -57.5(3)   | C5 | C6 | C7 | C8  | -1.0(4)   |
| O1  | C14 | C15 | F6  | -179.5(2)  | C6 | C7 | C8 | N1  | 178.0(2)  |
| O1  | C14 | C16 | F1  | 58.8(3)    | C6 | C7 | C8 | C3  | -1.7(4)   |
| O1  | C14 | C16 | F2  | -59.4(3)   | C8 | N1 | C1 | O2  | 96.5(2)   |
| O1  | C14 | C16 | F3  | 179.7(3)   | C8 | N1 | C1 | C2  | -19.0(2)  |
| O2  | C1  | C2  | O1  | 151.58(19) | C8 | N1 | C9 | O3  | -175.0(2) |
| O2  | C1  | C2  | C3  | -94.2(2)   | C8 | N1 | C9 | C10 | 4.5(4)    |
| O2  | C11 | C12 | F10 | 179.9(3)   | C8 | C3 | C4 | C5  | -2.9(4)   |
| O2  | C11 | C12 | F11 | 63.0(3)    | C9 | N1 | C1 | O2  | -78.4(3)  |
| O2  | C11 | C12 | F12 | -58.2(3)   | C9 | N1 | C1 | C2  | 166.1(2)  |



|              |           |              |           |
|--------------|-----------|--------------|-----------|
| O2 C11C13F7  | -61.6(4)  | C9 N1 C8 C3  | -177.8(2) |
| O2 C11C13F8  | 178.1(3)  | C9 N1 C8 C7  | 2.4(4)    |
| O2 C11C13F9  | 55.9(4)   | C11 O2 C1 N1 | 115.9(2)  |
| N1 C1 C2 O1  | -92.4(2)  | C11 O2 C1 C2 | -131.4(2) |
| N1 C1 C2 C3  | 21.8(2)   | C12C11C13F7  | 179.9(3)  |
| C1 O2 C11C12 | -140.0(2) | C12C11C13F8  | 59.6(5)   |
| C1 O2 C11C13 | 98.7(3)   | C12C11C13F9  | -62.5(4)  |
| C1 N1 C8 C3  | 8.2(3)    | C13C11C12F10 | -60.4(4)  |
| C1 N1 C8 C7  | -171.6(2) | C13C11C12F11 | -177.3(3) |
| C1 N1 C9 O3  | -1.4(4)   | C13C11C12F12 | 61.5(4)   |
| C1 N1 C9 C10 | 178.0(2)  | C14O1 C2 C1  | -119.6(2) |
| C1 C2 C3 C4  | 165.3(2)  | C14O1 C2 C3  | 129.6(2)  |
| C1 C2 C3 C8  | -17.9(3)  | C15C14C16F1  | -60.9(3)  |
| C2 O1 C14C15 | -115.6(2) | C15C14C16F2  | -179.1(3) |
| C2 O1 C14C16 | 121.6(2)  | C15C14C16F3  | 60.0(4)   |
| C2 C3 C4 C5  | 173.5(2)  | C16C14C15F4  | -177.6(3) |
| C2 C3 C8 N1  | 6.8(3)    | C16C14C15F5  | 62.6(3)   |
| C2 C3 C8 C7  | -173.3(2) | C16C14C15F6  | -59.3(3)  |
| C3 C4 C5 C6  | 0.2(4)    |              |           |

**Table S7 Hydrogen Atom Coordinates ( $\text{\AA} \times 10^4$ ) and Isotropic Displacement Parameters ( $\text{\AA}^2 \times 10^3$ ) for compound 2g.**

| Atom | <i>x</i> | <i>y</i> | <i>z</i> | U(eq) |
|------|----------|----------|----------|-------|
| H1   | -135.3   | 7365.6   | 306.68   | 54    |
| H2   | 1564.95  | 7081.94  | 1792.02  | 53    |
| H4   | 2731.99  | 5591     | 2457.01  | 63    |
| H5   | 3885.67  | 4352.83  | 2067.31  | 68    |
| H7   | 2624.26  | 4863.54  | -396.69  | 60    |
| H10A | 2458.75  | 5727.22  | -1537.38 | 99    |
| H10B | 732.29   | 5931.92  | -2080.7  | 99    |
| H10C | 702.56   | 5328.72  | -1316.99 | 99    |
| H11  | 989.7    | 8394.59  | -264.85  | 64    |
| H14  | -620.45  | 7289.79  | 2487.2   | 56    |

#### Crystal structure determination of compound 2g.

**Crystal Data** for  $\text{C}_{16}\text{H}_{10}\text{ClF}_{12}\text{NO}_3$  ( $M = 527.70$  g/mol): monoclinic, space group  $P2_1/c$  (no. 14),  $a = 7.7099(6)$   $\text{\AA}$ ,  $b = 16.5285(15)$   $\text{\AA}$ ,  $c = 15.8165(16)$   $\text{\AA}$ ,  $\beta = 94.189(7)$ ,  $V = 2010.2(3)$   $\text{\AA}^3$ ,  $Z = 4$ ,  $T = 293(2)$  K,  $\mu(\text{Mo K}\alpha) = 0.319$   $\text{mm}^{-1}$ ,  $D_{\text{calc}} = 1.744$   $\text{g/cm}^3$ , 11847 reflections measured ( $7.126^\circ \leq 2\theta \leq 52^\circ$ ), 3944 unique ( $R_{\text{int}} = 0.0312$ ,  $R_{\text{sigma}} = 0.0278$ ) which were used in all calculations. The final  $R_1$  was 0.0553 ( $I > 2\sigma(I)$ ) and  $wR_2$  was 0.1559 (all data).

## 7. Study on anti-tumor activity

### Anticancer activity assay

The 180  $\mu\text{L}$  cell suspensions (4500-5000 cells/mL) was seeded in 96-well plates and incubated for 24 h. All compounds and 5-FU were dissolved in the Phosphate Buffered Saline (PBS) with 1% DMSO to give various concentrations (2.5, 5, 10, 20, and 40  $\mu\text{M}$ , respectively) to 96-well plates and control wells contained supplemented media with 1% DMSO. Continue incubating for 48 h at 37  $^{\circ}\text{C}$  in 5%  $\text{CO}_2$  atmosphere and then the MTT solution (10  $\mu\text{L}$ , 5 mg/mL) was added into each well and the cultures were incubated further for 4~6 h. After removal of the supernatant, DMSO (100  $\mu\text{L}$ ) was added to dissolve the formazan crystals. The absorbance was read by enzyme labeling instrument with 570/630 nm double wavelength measurement. The cytotoxicity was estimated based on the percentage cell survival in a dose dependent manner relative to the negative control. The final  $\text{IC}_{50}$  (a drug concentration killing 50% cells) values were calculated by the Bliss method. All the tests were repeated in at least three independent experiments.

### Cells morphological analysis

The HeLa cells was seeded in 6-well plates and incubated for 24 h. Then, the cells were treated with different concentrations (0 and 10  $\mu\text{M}$ ) of the compound **2i** and incubated for 12 h. Finally, control and treated cells were observed with fluorescence microscope (Cytation 5 Cell Imaging Multi-Mode Reader, BioTek Instruments, Inc., USA.). The results shown that the cells were shrink, round and even die after treatment with compound **2i**, which revealed that the compound **2i** has a good inhibitory effect on HeLa cells.

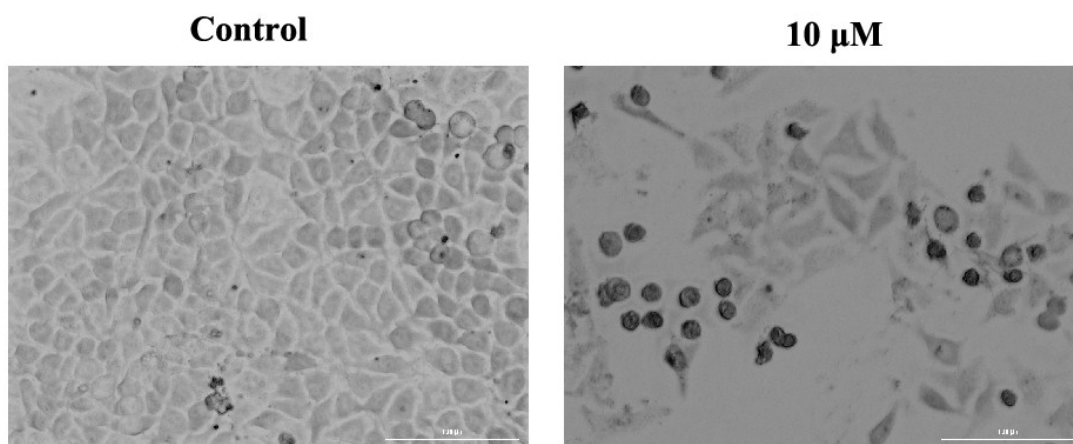

**Figure S4.** Changes of HeLa cell morphology after 12 h with treatment of compound **2i**.

### Hoechst 33342 nucleic acid staining

Nuclear morphological changes were observed through Hoechst 33342 staining. After treatment with compound **2i** for 24 h in HeLa cells, cells were washed with PBS and permeabilized with 0.1% Tween 20 for 10 min followed by staining with Hoechst 33342 (2.5  $\mu\text{g}/\text{mL}$ ). Control and treated cells were observed with fluorescence microscope (Cytation 5 Cell Imaging Multi-Mode Reader, BioTek Instruments, Inc., USA.). The results from Fig. S5 illustrated that the nuclear structure of untreated cells was intact whereas compound **2i** treated cells exhibited condensed, or fragmented nuclei.

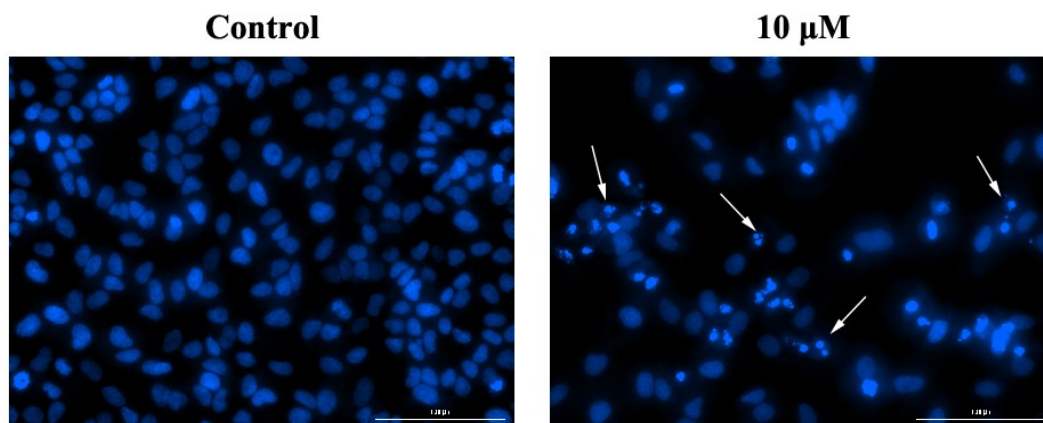

**Figure S5.** Assessment of nuclear morphological changes by Hoechst 33342 staining in HeLa cells after 24 h. Compound **2i** treated HeLa cells have displayed nuclear apoptotic characteristics such as nuclear fragmentation and shrunken nuclei.

### Measurement of intracellular reactive oxygen species

Intracellular reactive oxygen species (ROS) was detected by using fluorescence microscope by with 2',7'-dichlorofluorescein diacetate (DCFH-DA) staining kit. HeLa cells were seeded at  $2 \times 10^6$ /well in 10% FBS/DMEM into 6-well plates and treated with different concentrations of compound **2i** (0 and 10  $\mu$ M) for 24 h, then cells were washed twice with serum free DMEM and incubated with DCFH-DA for 30 minutes at 37 °C in dark. The fluorescence microscope was used to measure the enhanced green fluorescent intensity in cells, the intensity of the microscope is 488 nm, and the emission wavelength is 525 nm. As shown in Fig. S6, after treatment with compound **2i** (0 and 10  $\mu$ M), the green fluorescence intensity increased significantly in HeLa cells. Hence, compound **2i** can increase the intracellular levels of ROS.

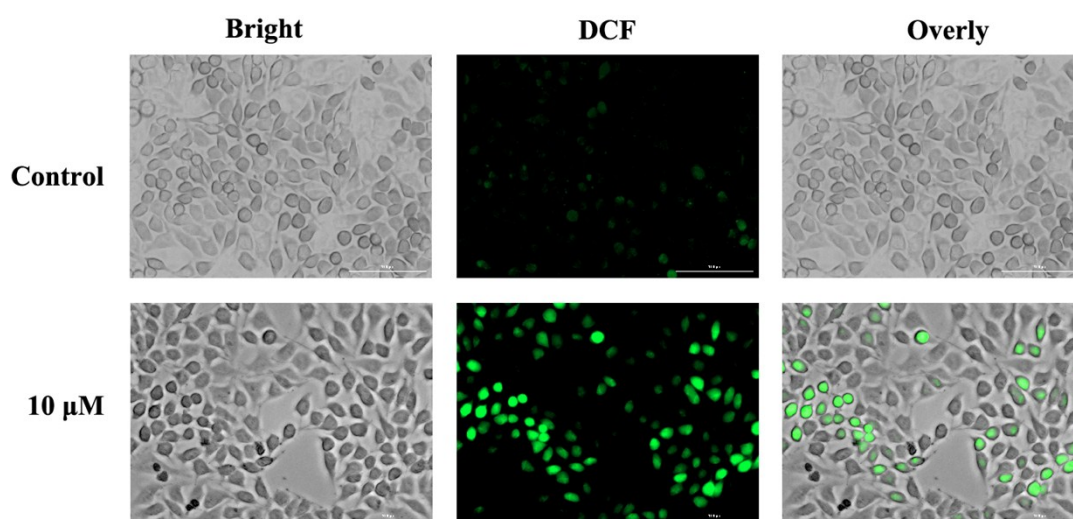

**Figure S6.** Changes in ROS concentration in HeLa cells treated with compound **2i** determined with a DCFH-DA staining kit under a fluorescence microscope. Scale bar: 100  $\mu$ m.

## 8. Characterization data for the fluoroalkylated indoles and anilines.

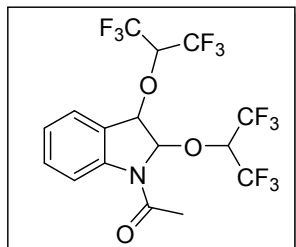

**1-(2,3-bis((1,1,1,3,3,3-hexafluoropropan-2-yl)oxy)indolin-1-yl)ethan-1-one (2a).** White solid (197.2 mg, 73%). mp:84.3-85.5 °C.  $^1\text{H NMR}$  (400 MHz,  $\text{CDCl}_3$ )  $\delta$  7.55 – 7.45 (m, 2H), 7.30 – 7.18 (m, 2H), 6.13 (s, 1H), 5.40 (s, 1H), 4.97 (s, 1H), 4.42 – 4.26 (m, 1H), 2.48 (s, 3H).  $^{13}\text{C NMR}$  (100 MHz,  $\text{CDCl}_3$ )  $\delta$  171.04, 141.81, 132.15, 128.00, 127.09, 125.23, 122.63, 122.26, 119.81, 119.44, 116.22, 93.89, 84.52, 74.52 (qui,  $J = 33.0$  Hz), 23.53.  $^{19}\text{F NMR}$  (376 MHz,  $\text{CDCl}_3$ )  $\delta$  -73.45 – (-73.63) (m, 3F), -74.00 – (-74.10) (m, 3F), -74.35 (d,  $J = 52.0$  Hz, 6F). **HRMS** (m/z) (ESI): calcd for  $\text{C}_{16}\text{H}_{12}\text{F}_{12}\text{NO}_3$   $[\text{M}+\text{H}]^+$  494.0626, found 494.0625.

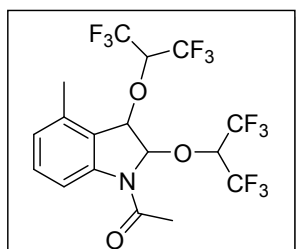

**1-(2,3-bis((1,1,1,3,3,3-hexafluoropropan-2-yl)oxy)-4-methylindolin-1-yl)ethan-1-one (2b).** Yellow oil (152.1 mg, 60%).  $^1\text{H NMR}$  (400 MHz,  $\text{CDCl}_3$ )  $\delta$  7.41 – 7.35 (m, 1H), 7.15 – 6.92 (m, 2H), 6.16 (s, 1H), 5.41 (s, 1H), 5.02 (s, 1H), 4.39 – 4.22 (m, 1H), 2.48 (s, 3H), 2.40 (s, 3H).  $^{13}\text{C NMR}$  (100 MHz,  $\text{CDCl}_3$ )  $\delta$  171.26, 141.82, 138.77, 131.99, 126.81, 126.06, 122.94, 122.32, 120.09, 119.51, 113.65, 92.41, 83.28, 74.41 (qui,  $J = 33.7$  Hz), 23.37, 18.12.  $^{19}\text{F NMR}$  (376 MHz,  $\text{CDCl}_3$ )  $\delta$  -73.20(-73.50) (m, 6F), -74.05(-74.55) (m, 6F). **HRMS** (m/z) (ESI): calcd for  $\text{C}_{17}\text{H}_{14}\text{F}_{12}\text{NO}_3$   $[\text{M}+\text{H}]^+$  508.0782, found 508.0773.

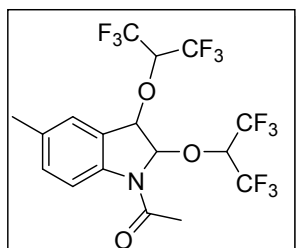

**1-(2,3-bis((1,1,1,3,3,3-hexafluoropropan-2-yl)oxy)-5-methylindolin-1-yl)ethan-1-one (2c).** Yellow oil (164.8 g, 65%).  $^1\text{H NMR}$  (400 MHz,  $\text{CDCl}_3$ )  $\delta$  7.32 – 7.26 (m, 2H), 7.18 – 7.02 (m, 1H), 6.12 (s,

1H), 5.39 (s, 1H), 4.92 (s, 1H), 4.35 – 4.28 (m, 1H), 2.48 – 2.43 (m, 3H), 2.40 (s, 3H). <sup>13</sup>C NMR (100 MHz, CDCl<sub>3</sub>) δ 170.70, 157.04, 139.20, 134.96, 132.38, 128.10, 125.87, 117.81, 115.68, 93.62, 84.26, 74.05 (qui, *J* = 32.0 Hz), 23.12, 20.72. <sup>19</sup>F NMR (376 MHz, CDCl<sub>3</sub>) δ -73.3(-73.7) (m, 3F), -73.8(-74.15) (m, 3F), -74.38 (d, *J* = 41.4 Hz).

**HRMS** (m/z) (ESI): calcd for C<sub>17</sub>H<sub>13</sub>F<sub>12</sub>NO<sub>3</sub>Na [M+Na]<sup>+</sup> 530.0602, found 530.0589.

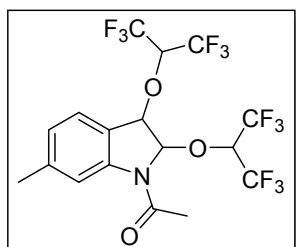

**1-(2,3-bis((1,1,1,3,3,3-hexafluoropropan-2-yl)oxy)-6-methylindolin-1-yl)ethan-1-one (2d).**

Yellow oil (167.3 mg, 66%). <sup>1</sup>H NMR (400 MHz, CDCl<sub>3</sub>) δ 7.39 – 7.33 (m, 1H), 7.09 – 7.00 (m, 2H), 6.11 (s, 1H), 5.40 (s, 1H), 4.95 (s, 1H), 4.36 – 4.24 (m, 1H), 2.48 (s, 3H), 2.44 (s, 3H). <sup>13</sup>C NMR (100 MHz, CDCl<sub>3</sub>) δ 171.34, 143.24, 142.44, 127.99, 126.35, 122.96, 122.60, 122.58, 120.16, 119.79, 117.27, 94.70, 84.50, 74.41 (qui, *J* = 33.0 Hz), 23.87, 22.58. <sup>19</sup>F NMR (376 MHz, CDCl<sub>3</sub>) δ -73.58 (s, 1F), -74.00 – (-74.20) (m, 3F), -74.39 (d, *J* = 40.1 Hz, 6F). **HRMS** (m/z) (ESI): calcd for C<sub>17</sub>H<sub>14</sub>F<sub>12</sub>NO<sub>3</sub> [M+H]<sup>+</sup> 508.0782, found 508.0769.

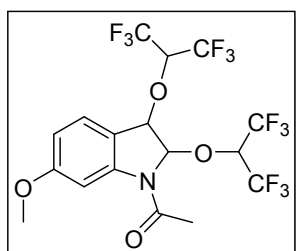

**1-(2,3-bis((1,1,1,3,3,3-hexafluoropropan-2-yl)oxy)-6-methoxyindolin-1-yl)ethan-1-one (2e).**

Colorless oil (235.4 mg, 90%). <sup>1</sup>H NMR (400 MHz, CDCl<sub>3</sub>) δ 7.44 – 7.33 (m, 1H), 6.85 – 6.60 (m, 2.0 Hz, 2H), 6.11 (s, 1H), 5.38 (s, 1H), 4.94 (s, 1H), 4.35 – 4.23 (m, 1H), 3.85 (s, 3H), 2.46 (s, 3H). <sup>13</sup>C NMR (100 MHz, CDCl<sub>3</sub>) δ 170.99, 163.05, 143.36, 128.85, 125.49, 122.68, 122.35, 119.92, 119.07, 109.39, 103.90, 94.92, 83.96, 74.18 (qui, *J* = 32.9 Hz), 55.87, 23.47. <sup>19</sup>F NMR (376 MHz, CDCl<sub>3</sub>) δ -73.64 (s, 3F), -74.10 – (-74.30) (m, 3F), -74.47 (d, *J* = 34.0 Hz, 6F). **HRMS** (m/z) (ESI): calcd for C<sub>17</sub>H<sub>14</sub>F<sub>12</sub>NO<sub>4</sub> [M+H]<sup>+</sup> 524.0726, found 524.0731.

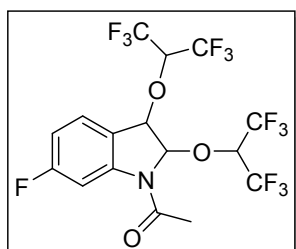

**1-(6-fluoro-2,3-bis((1,1,1,3,3,3-hexafluoropropan-2-yl)oxy)indolin-1-yl)ethan-1-one (2f).**

Colorless oil (173.5 g, 68%).  $^1\text{H NMR}$  (400 MHz,  $\text{CDCl}_3$ )  $\delta$  7.50 – 7.40 (m, 1H), 7.10 – 6.75 (m, 2H), 6.12 (s, 1H), 5.37 (s, 1H), 4.93 (s, 1H), 4.36 – 4.24 (m, 1H), 2.47 (s, 3H).  $^{13}\text{C NMR}$  (100 MHz,  $\text{CDCl}_3$ )  $\delta$  170.64, 165.13 (d,  $J = 250.4$  Hz), 143.21, 129.24, 122.61, 122.21, 119.80, 119.36, 112.24 (d,  $J = 23.1$  Hz), 104.72, 104.43, 94.61, 84.06, 74.70 (qui,  $J = 30.7$  Hz), 23.56.  $^{19}\text{F NMR}$  (376 MHz,  $\text{CDCl}_3$ )  $\delta$  -73.62 (s, 3F), -74.0 – (-74.13) (m, 3F), -74.38 (d,  $J = 48.8$  Hz, 6F), -105.90 (s, 1F). **HRMS** (m/z) (ESI): calcd for  $\text{C}_{16}\text{H}_{11}\text{F}_{13}\text{NO}_3$   $[\text{M}+\text{H}]^+$  512.0531, found 512.0525.

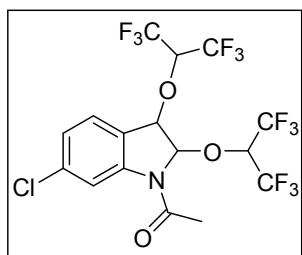

**1-(6-chloro-2,3-bis((1,1,1,3,3,3-hexafluoropropan-2-yl)oxy)indolin-1-yl)ethan-1-one (2g).**

Yellow solid (163.4 mg, 62%). mp: 71.2-72.3 °C.  $^1\text{H NMR}$  (400 MHz,  $\text{CDCl}_3$ )  $\delta$  7.42 (d,  $J = 8.1$  Hz, 1H), 7.31 – 7.17 (m, 2H), 6.11 (s, 1H), 5.36 (s, 1H), 4.93 (s, 1H), 4.37 – 4.27 (m, 1H), 2.49 (s, 3H).  $^{13}\text{C NMR}$  (100 MHz,  $\text{CDCl}_3$ ) 170.70, 142.79, 138.22, 128.71, 125.44, 122.57, 122.20, 119.77, 119.39, 116.61, 94.25, 84.09, 74.86 (qui,  $J = 33.5$  Hz), 23.63.  $^{19}\text{F NMR}$  (376 MHz,  $\text{CDCl}_3$ )  $\delta$  -73.69 (s, 3F), -74.00 – (-74.15) (m, 3F), -74.41 (d,  $J = 37.6$  Hz, 6F). **HRMS** (m/z) (ESI): calcd for  $\text{C}_{16}\text{H}_{11}\text{ClF}_{12}\text{NO}_3$   $[\text{M}+\text{H}]^+$  528.0236, found 528.0229.

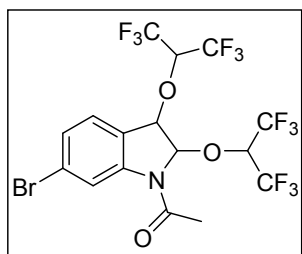

**1-(6-bromo-2,3-bis((1,1,1,3,3,3-hexafluoropropan-2-yl)oxy)indolin-1-yl)ethan-1-one (2h).**

Yellow solid (165.03 mg, 58%). mp: 76.4-77.5 °C.  $^1\text{H NMR}$  (400 MHz,  $\text{CDCl}_3$ )  $\delta$  7.58 – 7.27 (m, 3H), 6.10 (s, 1H), 5.56 – 5.14 (m, 1H), 4.92 (s, 1H), 4.40 – 4.25 (m, 1H), 2.48 (s, 3H).  $^{13}\text{C NMR}$  (101 MHz,  $\text{CDCl}_3$ )  $\delta$  170.63, 143.03, 128.95, 128.39, 126.20, 122.61, 122.21, 119.81, 119.40, 94.22, 84.12, 74.47 (qui,  $J = 33.2$  Hz), 23.54.  $^{19}\text{F NMR}$  (376 MHz,  $\text{CDCl}_3$ )  $\delta$  -73.73 (d,  $J = 4.9$  Hz, 3F), -74.05 – (-74.20) (m, 3F), -74.44 (d,  $J = 26.3$  Hz, 6F). **HRMS** (m/z) (ESI): calcd for  $\text{C}_{16}\text{H}_{11}\text{BrF}_{12}\text{NO}_2$   $[\text{M}+\text{H}]^+$  571.9731 and 573.9710, found 571.9726 and 573.9703.

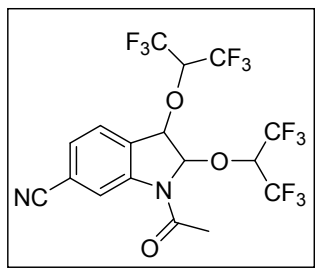

**1-acetyl-2,3-bis((1,1,1,3,3,3-hexafluoropropan-2-yl)oxy)indoline-6-carbonitrile (2i).** Colorless oil (161.2 mg, 62%).  $^1\text{H NMR}$  (400 MHz,  $\text{CDCl}_3$ )  $\delta$  7.65 – 7.59 (m, 1H), 7.58 – 7.40 (m, 2H), 6.13 (s, 1H), 5.57 – 5.17 (m, 1H), 4.99 (s, 1H), 4.50 – 4.30 (m, 1H), 2.51 (s, 3H).  $^{13}\text{C NMR}$  (100 MHz,  $\text{CDCl}_3$ )  $\delta$  170.48, 142.07, 132.05, 129.11, 128.71, 122.49, 122.27, 119.45, 118.87, 117.76, 116.01, 93.57, 84.14, 23.62.  $^{19}\text{F NMR}$  (376 MHz,  $\text{CDCl}_3$ )  $\delta$  -73.67 (s, 3F), -73.88 – (-73.98) (m, 3F), -74.33 (d,  $J$  = 48.9 Hz, 6F). **HRMS** (m/z) (ESI): calcd for  $\text{C}_{17}\text{H}_{10}\text{F}_{12}\text{N}_2\text{O}_3\text{Na}$   $[\text{M}+\text{Na}]^+$  541.0398, found 541.0392.

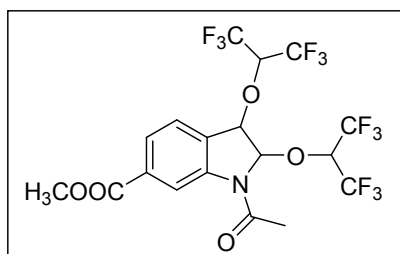

**methyl 1-acetyl-2,3-bis((1,1,1,3,3,3-hexafluoropropan-2-yl)oxy)indoline-6-carboxylate (2j).** Colorless oil (169.3 mg, 59%).  $^1\text{H NMR}$  (400 MHz,  $\text{CDCl}_3$ )  $\delta$  8.0 – 7.85 (m, 2H), 7.65 – 7.45 (m, 1H), 6.16 (s, 1H), 5.39 (s, 1H), 4.98 (s, 1H), 4.43 – 4.27 (m, 1H), 3.97 (s, 3H), 2.55 (s, 3H).  $^{13}\text{C NMR}$  (100 MHz,  $\text{CDCl}_3$ )  $\delta$  165.73, 133.89, 127.63, 126.46, 116.71, 93.69, 84.08, 52.73, 23.48.  $^{19}\text{F NMR}$  (376 MHz,  $\text{CDCl}_3$ )  $\delta$  -73.50(-73.75) (m, 3F), -73.92 – (-74.04) (m, 3F), -74.35 (d,  $J$  = 48.9 Hz, 6F). **HRMS** (m/z) (ESI): calcd for  $\text{C}_{18}\text{H}_{13}\text{F}_{12}\text{NO}_5\text{Na}$   $[\text{M}+\text{Na}]^+$  574.0500, found 574.0493.

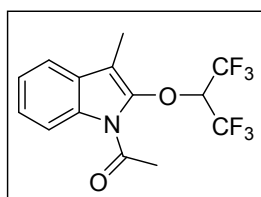

**1-(2-((1,1,1,3,3,3-hexafluoropropan-2-yl)oxy)-3-methyl-1H-indol-1-yl)ethan-1-one (2k).** Yellow soild (119 mg, 70%). mp: 65.7 – 66.6 °C.  $^1\text{H NMR}$  (400 MHz,  $\text{CDCl}_3$ )  $\delta$  8.32 – 8.20 (m, 1H), 7.48 – 7.39 (m, 1H), 7.37 – 7.27 (m, 2H), 5.05 – 4.96 (m, 1H), 2.64 (s, 3H), 2.28 (s, 3H).  $^{13}\text{C NMR}$  (100 MHz,  $\text{CDCl}_3$ )  $\delta$  169.09, 144.02, 131.77, 127.94, 125.36, 123.74, 122.08, 119.28, 118.12, 115.89, 99.94, 78.58 (qui,  $J$  = 33.2 Hz), 26.16, 7.33.  $^{19}\text{F NMR}$  (376 MHz,  $\text{CDCl}_3$ )  $\delta$  -72.54 (s, 6F). **HRMS** (m/z) (ESI): calcd for  $\text{C}_{14}\text{H}_{12}\text{F}_6\text{NO}_2$   $[\text{M}+\text{H}]^+$  340.0772, found 340.0774.

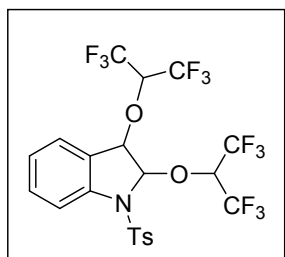

**2,3-bis((1,1,1,3,3,3-hexafluoropropan-2-yl)oxy)-1-tosylindoline (2l).** White solid (212.4 mg, 70%). mp: 103.1 – 104.5 °C.  $^1\text{H NMR}$  (400 MHz, Acetone- $d_6$ )  $\delta$  7.78 – 7.71 (m, 1H), 7.68 – 7.52 (m, 4H), 7.36 – 7.26 (m, 3H), 5.86 (s, 1H), 5.64 – 5.47 (m, 2H), 5.26 (s, 1H), 2.34 (s, 3H).  $^{13}\text{C NMR}$  (100 MHz, Acetone- $d_6$ )  $\delta$  145.57, 141.33, 133.56, 132.05, 129.88, 128.20, 127.27, 127.18, 126.15, 123.40, 122.46, 120.58, 119.60, 117.09, 96.89, 85.78, 75.19 (qui,  $J = 32.7$  Hz), 71.48 (qui,  $J = 33.1$  Hz), 20.46.  $^{19}\text{F NMR}$  (376 MHz, Acetone- $d_6$ )  $\delta$  -74.25 – (-74.40) (m, 3F), -74.47 – (-74.64) (m, 6F), -74.90 – (-75.02) (m, 3F). **HRMS** (m/z) (ESI): calcd for  $\text{C}_{21}\text{H}_{15}\text{F}_{12}\text{NO}_4\text{SNa}$   $[\text{M}+\text{Na}]^+$  628.0428, found 628.0427.

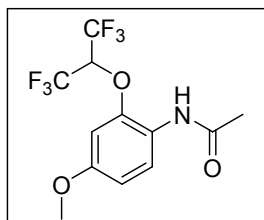

**N-(2-((1,1,1,3,3,3-hexafluoropropan-2-yl)oxy)-4-methoxyphenyl)acetamide (2m).** Colorless oil (104.6 mg, 63%). mp: 85.6 – 86.3 °C.  $^1\text{H NMR}$  (400 MHz,  $\text{CDCl}_3$ )  $\delta$  8.23 – 8.12 (m, 1H), 7.33 (s, 1H), 6.72 – 6.65 (m, 1H), 6.61 – 6.54 (m, 1H), 4.88 – 4.78 (m, 1H), 3.79 (s, 3H), 2.18 (s, 3H).  $^{13}\text{C NMR}$  (100 MHz,  $\text{CDCl}_3$ )  $\delta$  168.14, 156.56, 147.28, 123.27, 122.44, 119.45, 109.02, 102.56, 55.72, 24.43.  $^{19}\text{F NMR}$  (376 MHz,  $\text{CDCl}_3$ )  $\delta$  -73.51 (s, 6F). **HRMS** (m/z) (ESI): calcd for  $\text{C}_{12}\text{H}_{12}\text{F}_6\text{NO}_3$   $[\text{M}+\text{H}]^+$  332.0721, found 332.0736.

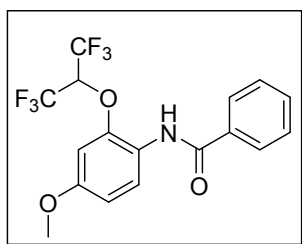

**N-(2-((1,1,1,3,3,3-hexafluoropropan-2-yl)oxy)-4-methoxyphenyl)benzamide (2n).** Colorless oil (116.5 mg, 59%). mp: 102.3 – 102.6 °C.  $^1\text{H NMR}$  (400 MHz, Acetone- $d_6$ )  $\delta$  8.80 (s, 1H), 8.01 – 7.85 (m, 3H), 7.60 – 7.41 (m, 3H), 6.96 – 6.88 (m, 1H), 6.82 – 6.66 (m, 1H), 6.13 – 5.93 (m, 1H), 3.77 (s, 3H).  $^{13}\text{C NMR}$  (100 MHz, Acetone- $d_6$ )  $\delta$  165.89, 158.49, 150.08, 135.85, 132.46, 129.45, 127.97, 126.44, 123.74, 122.78, 120.92, 109.89, 102.82, 75.43 (qui,  $J = 33.1$  Hz), 56.06.  $^{19}\text{F NMR}$  (376 MHz, Acetone- $d_6$ )  $\delta$  -74.30 (s, 6F). **HRMS** (m/z) (ESI): calcd for  $\text{C}_{17}\text{H}_{14}\text{F}_6\text{NO}_3\text{Na}$   $[\text{M}+\text{Na}]^+$  416.0697, found 416.0692.



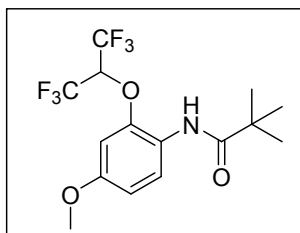

**N-(2-((1,1,1,3,3,3-hexafluoropropan-2-yl)oxy)-4-methoxyphenyl)pivalamide (2o).** Colorless oil (129.1 mg, 69%). mp: 97.0 – 98.0 °C.  $^1\text{H NMR}$  (400 MHz,  $\text{CDCl}_3$ )  $\delta$  8.40 – 8.16 (m, 1H), 7.77 (s, 1H), 6.78 – 6.63 (m, 1H), 6.61 – 6.46 (m, 1H), 4.94 – 4.80 (m, 1H), 3.79 (s, 3H), 1.30 (s, 9H).  $^{13}\text{C NMR}$  (100 MHz,  $\text{CDCl}_3$ )  $\delta$  176.59, 156.32, 147.29, 122.85, 122.64, 122.40, 119.59, 108.72, 102.09, 76.62 (qui,  $J = 33.1$  Hz), 55.87, 40.00, 27.55.  $^{19}\text{F NMR}$  (376 MHz,  $\text{CDCl}_3$ )  $\delta$  -73.61 (s, 6F). **HRMS** (m/z) (ESI): calcd for  $\text{C}_{15}\text{H}_{18}\text{F}_6\text{NO}_3$   $[\text{M}+\text{H}]^+$  374.1191, found 374.1185.

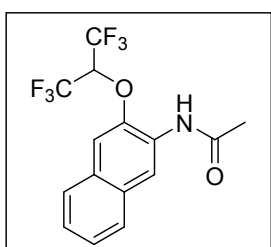

**N-(3-((1,1,1,3,3,3-hexafluoropropan-2-yl)oxy)naphthalen-2-yl)acetamide (2p).** White solid (94.8 mg, 54%). mp: 155.1 – 156.5 °C.  $^1\text{H NMR}$  (400 MHz, Acetone- $d_6$ )  $\delta$  8.80 (s, 1H), 8.06-8.00 (m, 1H), 7.91 – 7.81 (m, 2H), 7.76 – 7.69 (m, 1H), 7.58 – 7.45 (m, 2H), 5.85 – 5.65 (m, 1H), 2.14 (s, 3H).  $^{13}\text{C NMR}$  (100 MHz, Acetone- $d_6$ )  $\delta$  169.78, 144.15, 133.23, 128.93, 127.92, 127.72, 126.87, 126.67, 125.63, 121.66, 76.54 (qui,  $J = 32.0$  Hz), 23.73.  $^{19}\text{F NMR}$  (376 MHz, Acetone- $d_6$ )  $\delta$  -72.79 (s, 6F). **HRMS** (m/z) (ESI): calcd for  $\text{C}_{15}\text{H}_{12}\text{F}_6\text{NO}_2$   $[\text{M}+\text{H}]^+$  352.0772, found 352.0768.

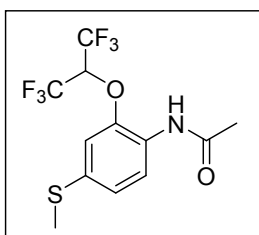

**N-(2-((1,1,1,3,3,3-hexafluoropropan-2-yl)oxy)-4-(methylthio)phenyl)acetamide (2q).** White solid (69.6 mg, 40%). mp: 116.6 – 117.4 °C.  $^1\text{H NMR}$  (400 MHz,  $\text{CDCl}_3$ )  $\delta$  8.26 – 8.16 (m, 1H), 7.92 (s, 1H), 7.21 – 7.11 (m, 1H), 7.02 – 6.91 (m, 1H), 4.80 – 4.69 (m, 1H), 2.42 (s, 3H), 2.22 (s, 3H).  $^{13}\text{C NMR}$  (100 MHz,  $\text{CDCl}_3$ )  $\delta$  168.51, 153.93, 134.50, 128.52, 122.83, 122.54, 120.79, 119.72, 116.65, 76.74 (qui,  $J = 33.3$  Hz), 24.77, 18.29.  $^{19}\text{F NMR}$  (376 MHz, Acetone- $d_6$ )  $\delta$  -72.75 (s, 6F). **HRMS** (m/z) (ESI): calcd for  $\text{C}_{12}\text{H}_{12}\text{F}_6\text{NO}_2\text{S}$   $[\text{M}+\text{H}]^+$  348.0493, found 348.0489.

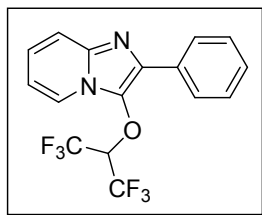

**3-((1,1,1,3,3,3-hexafluoropropan-2-yl)oxy)-2-phenylimidazo[1,2-a]pyridine (2r).** White solid (153.0 mg, 85%). mp: 150.2 – 151.4 °C. <sup>1</sup>H NMR (400 MHz, CDCl<sub>3</sub>) δ 8.04 – 7.95 (m, 1H), 7.95 – 7.82 (m, 2H), 7.65 – 7.53(m, 1H), 7.52 – 7.45 (m, 2H), 7.43 – 7.35 (m, 1H), 7.23 – 7.15 (m, 1H), 6.92 – 6.82 (m, 1H), 4.75 – 4.63 (m, 1H). <sup>13</sup>C NMR (100 MHz, CDCl<sub>3</sub>) δ 139.52, 132.03, 129.24, 129.07, 128.68, 127.82, 124.75, 121.62, 118.01, 112.82, 76.36 (qui, *J* = 32.5 Hz). <sup>19</sup>F NMR (376 MHz, CDCl<sub>3</sub>) δ -72.71 (s, 6F). HRMS (m/z) (ESI): calcd for C<sub>16</sub>H<sub>12</sub>F<sub>6</sub>N<sub>2</sub>O [M+H]<sup>+</sup> 361.0776, found 361.0771.

## 9. Copies of $^1\text{H}$ NMR and $^{13}\text{C}$ NMR for the fluoroalkylated indoles and anilines.

### 2-(2,3-bis((1,1,1,3,3,3-hexafluoropropan-2-yl)oxy)indolin-1-yl)ethan-1-one (2a)

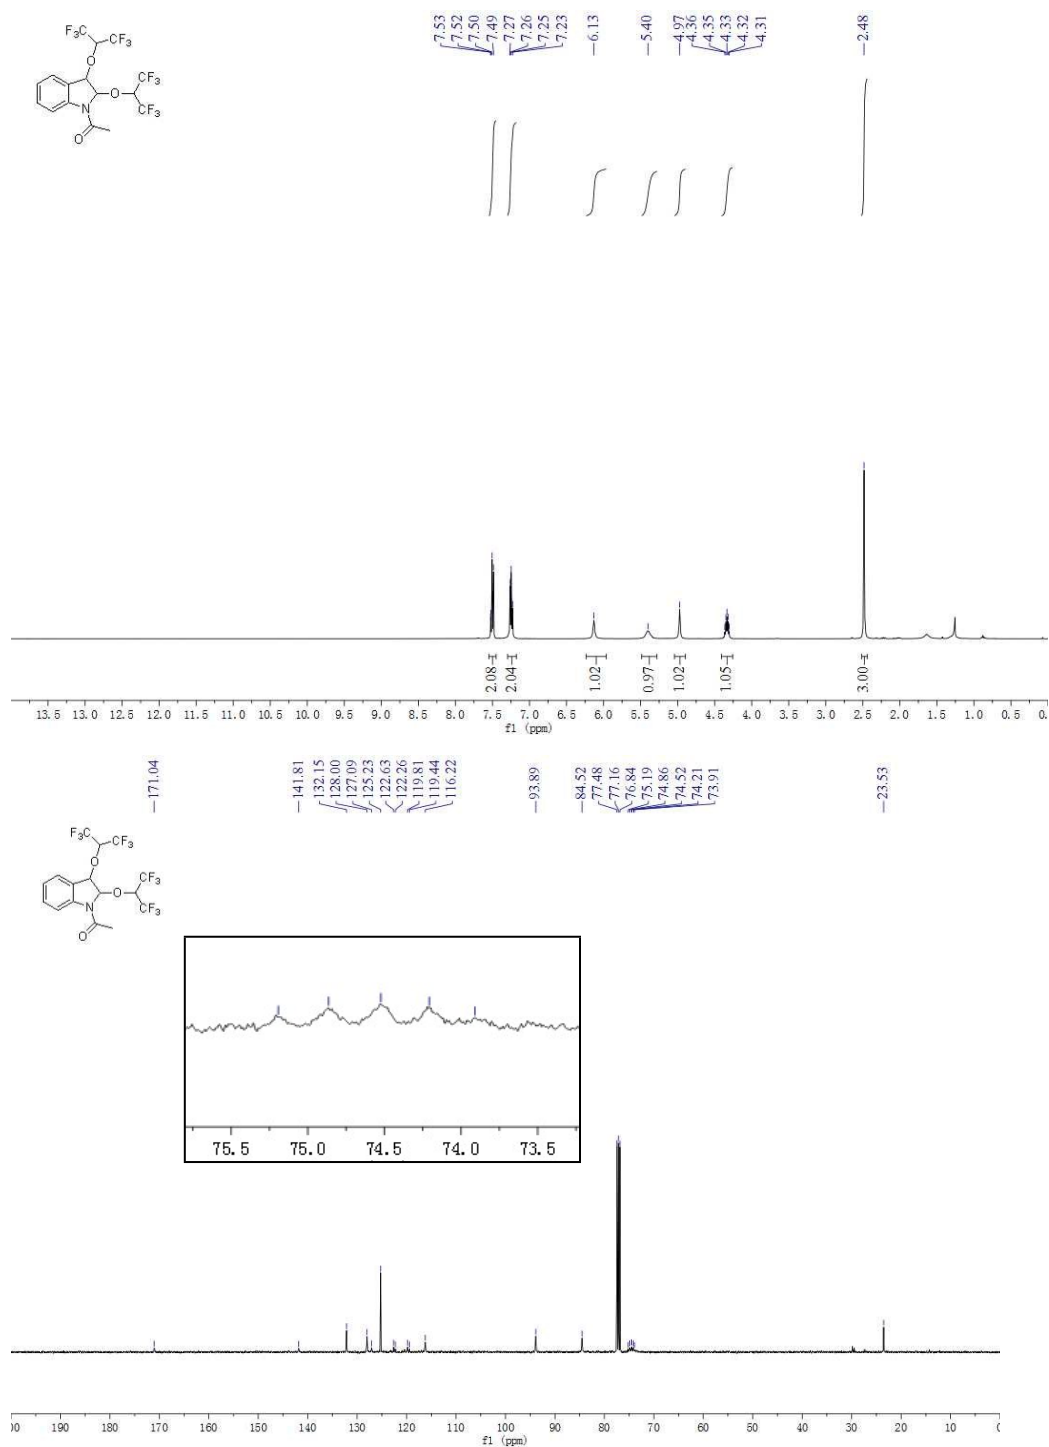

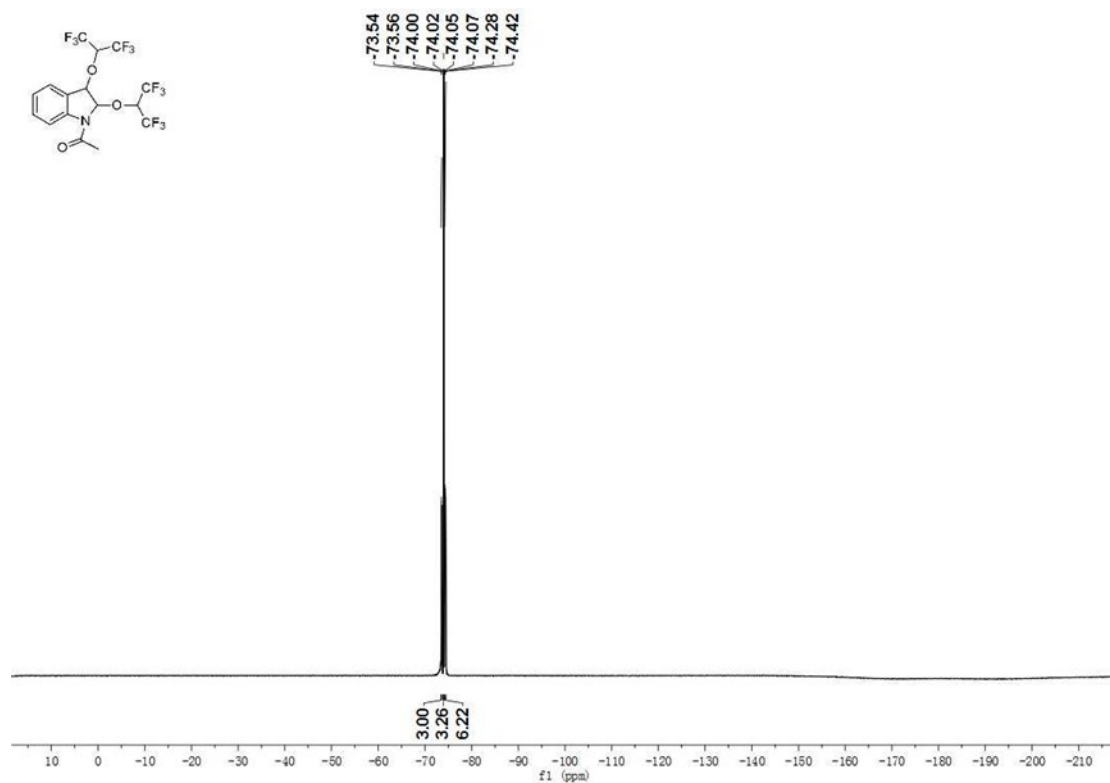

**1-(2,3-bis((1,1,1,3,3,3-hexafluoropropan-2-yl)oxy)-4-methylindolin-1-yl)ethan-1-one (2b)**

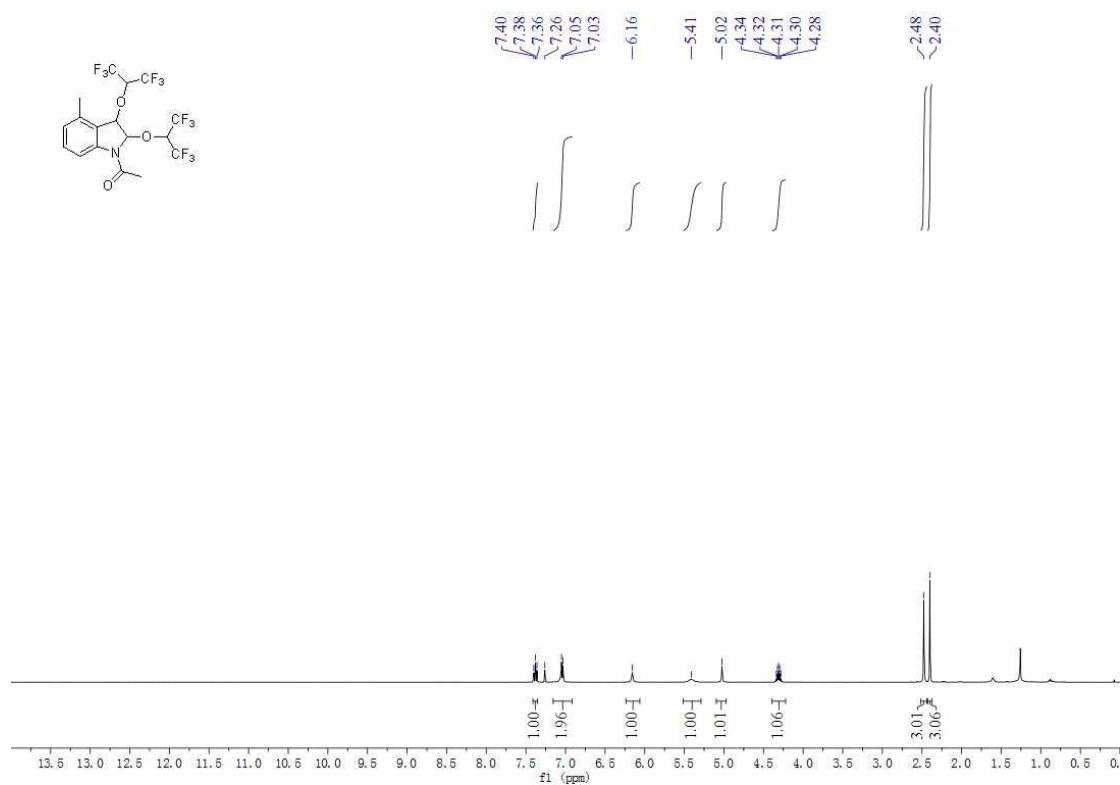

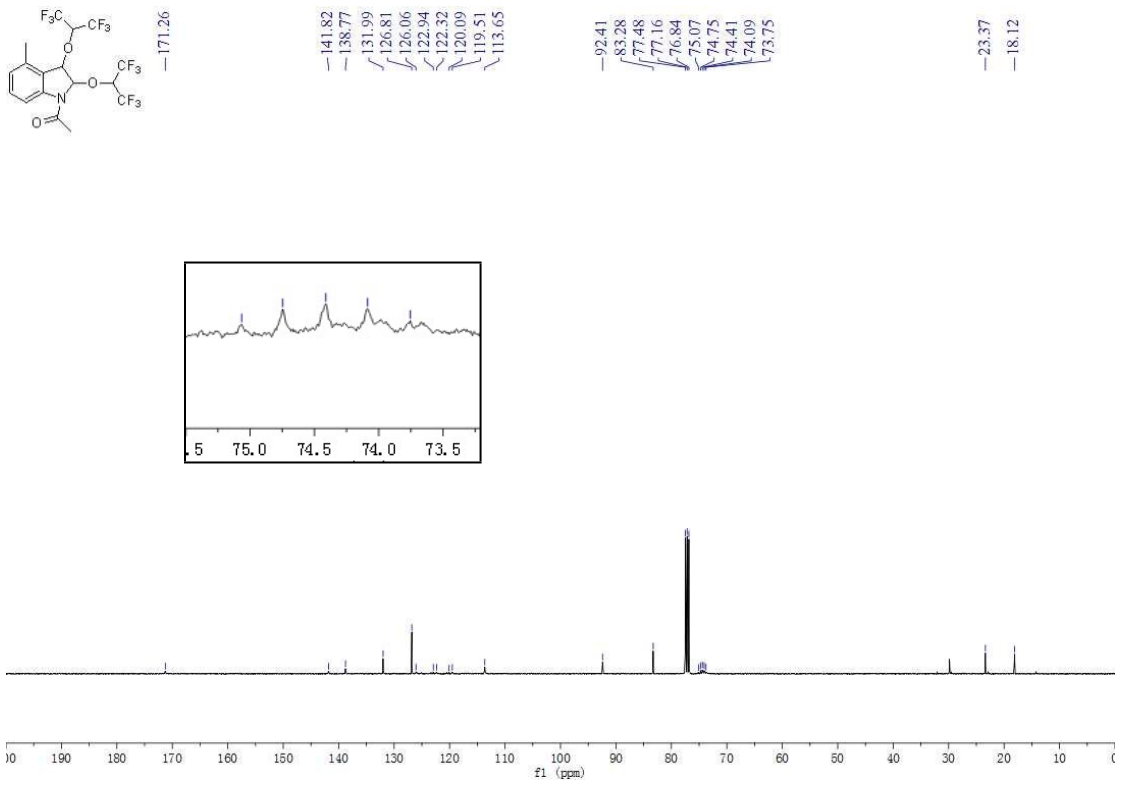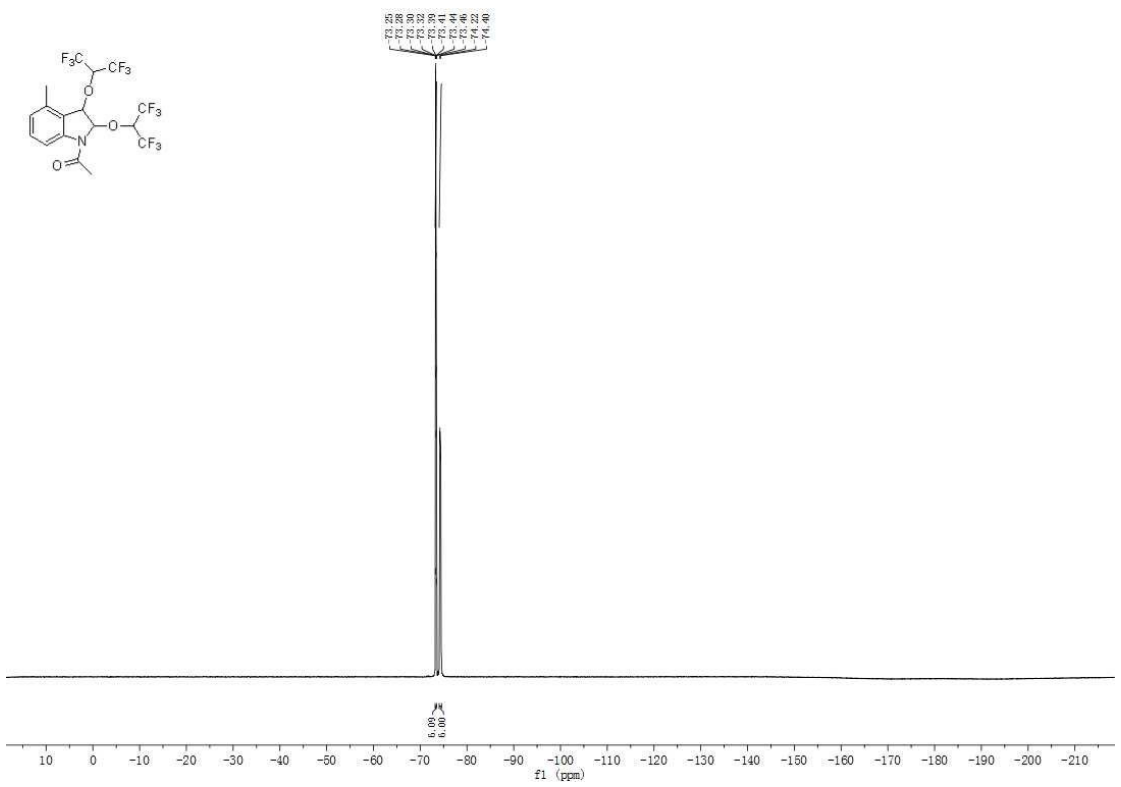

**1-(2,3-bis((1,1,1,3,3,3-hexafluoropropan-2-yl)oxy)-5-methylindolin-1-yl)ethan-1-one (2c)**

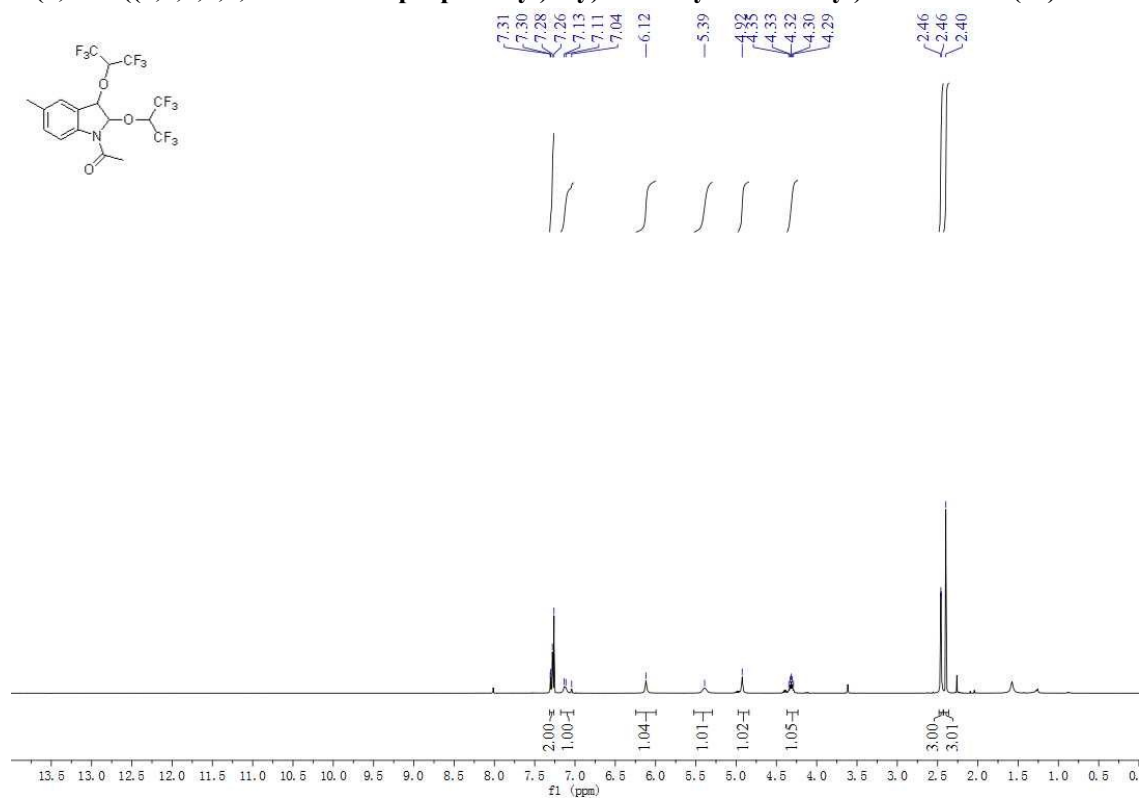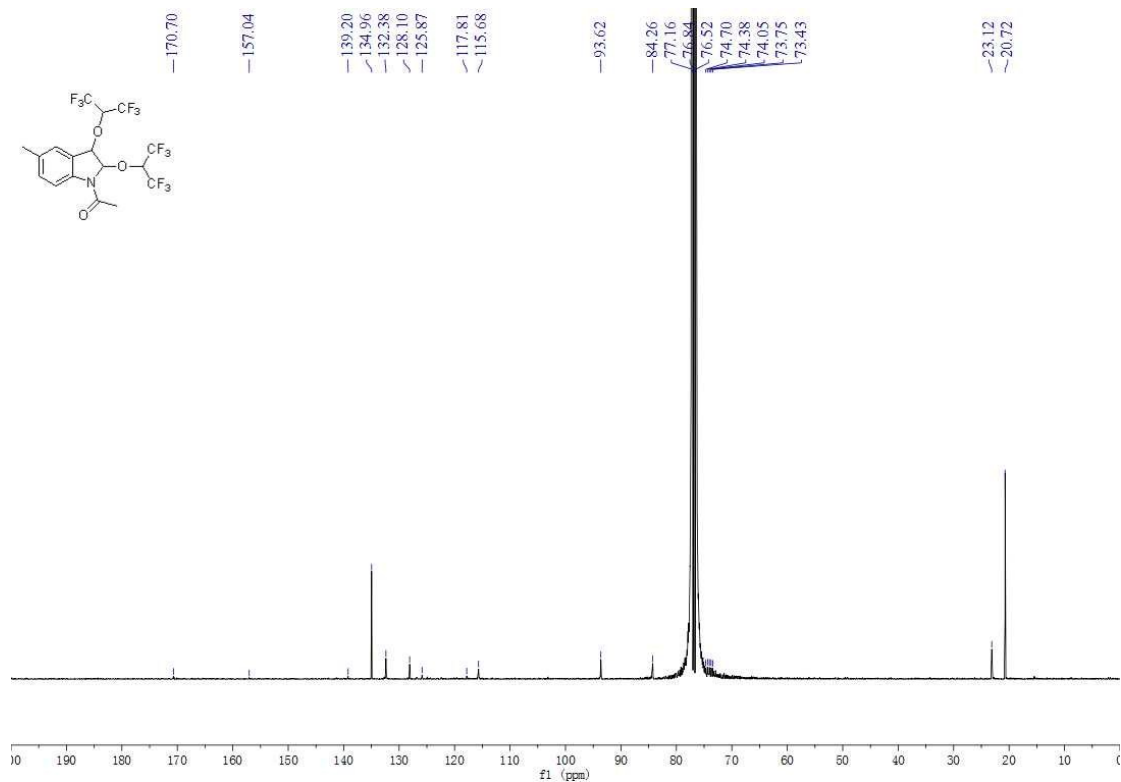

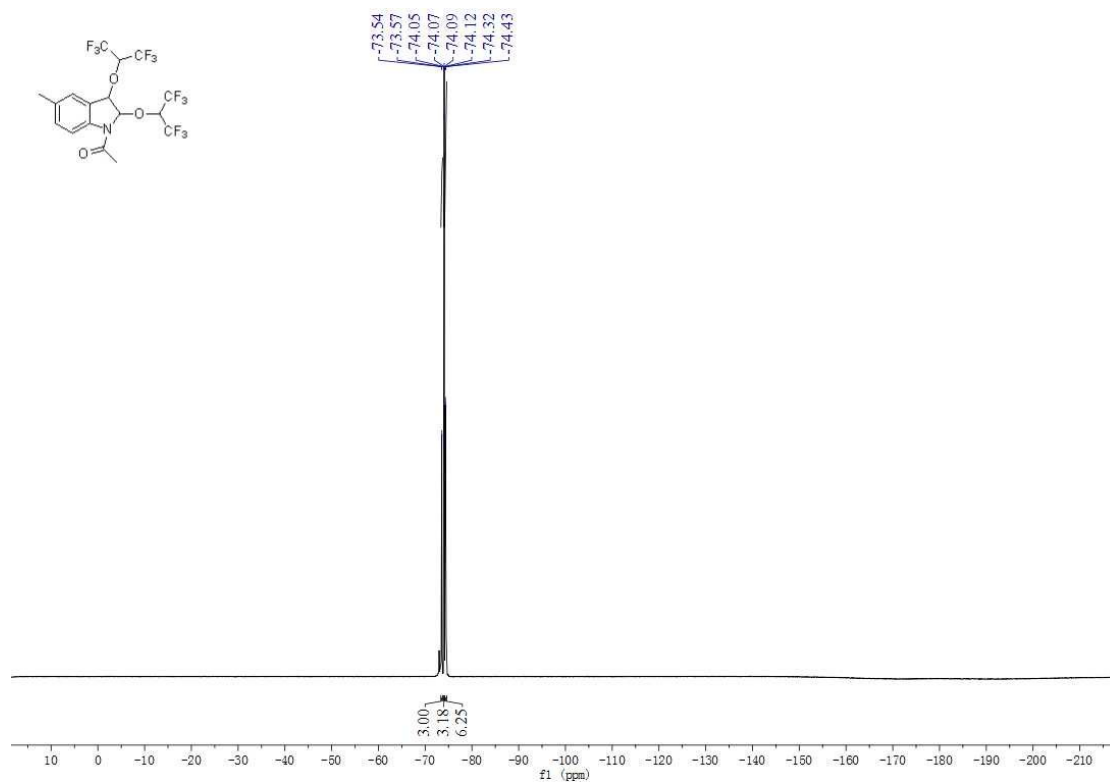

**1-(2,3-bis((1,1,1,3,3,3-hexafluoropropan-2-yl)oxy)-6-methylindolin-1-yl)ethan-1-one (2d)**

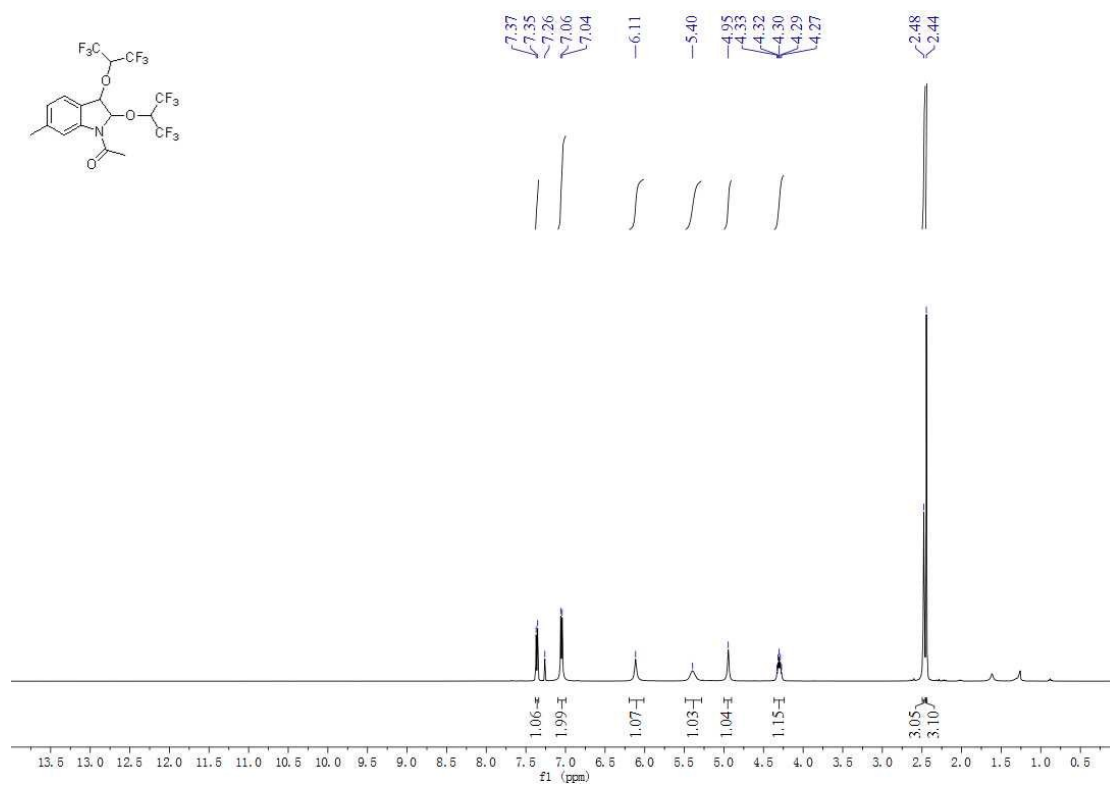

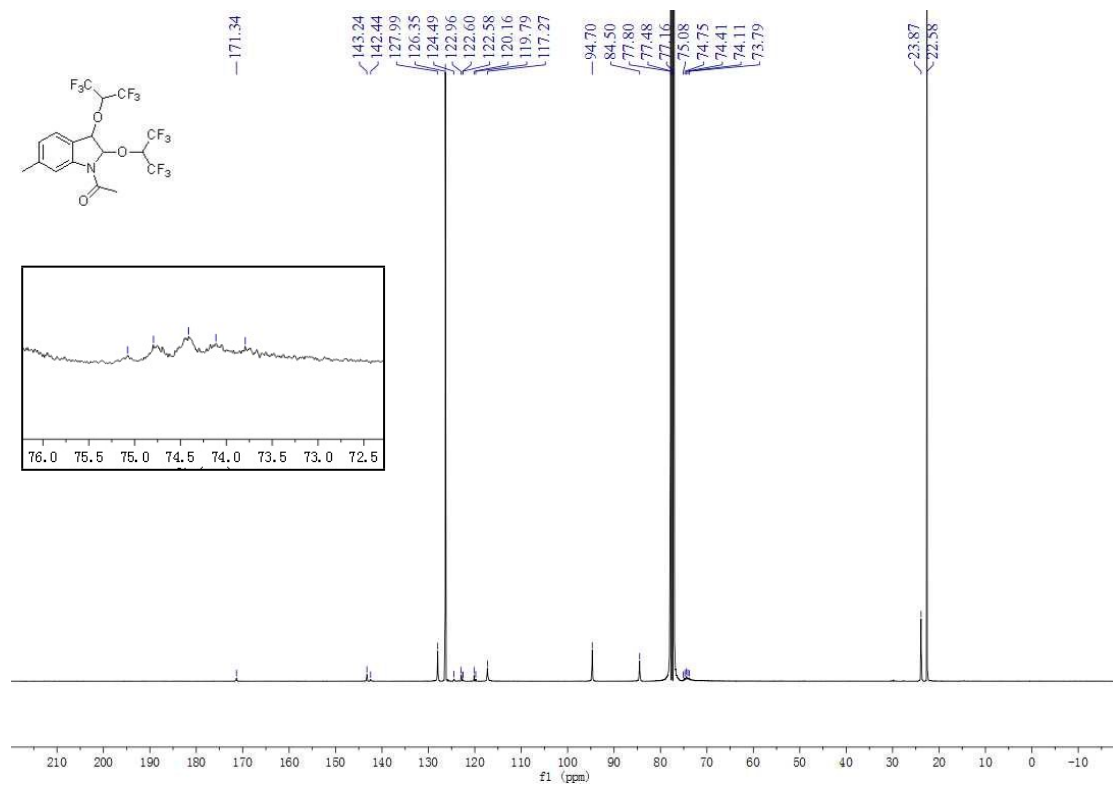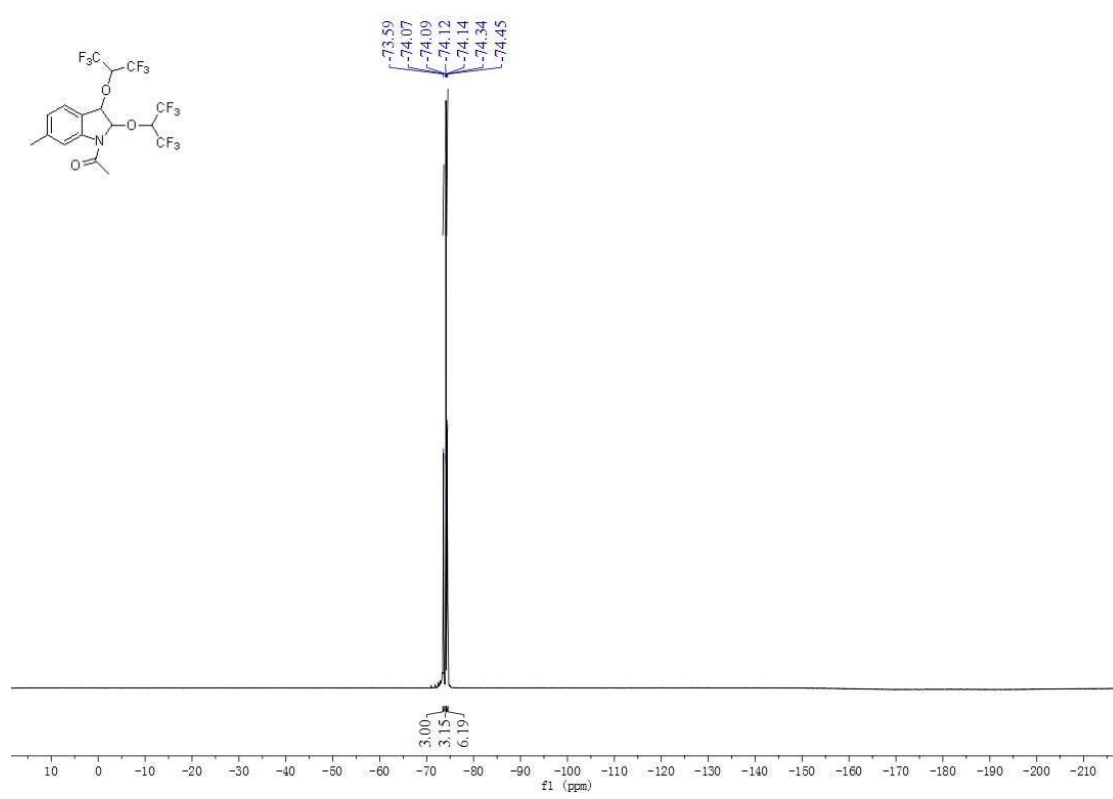



**1-(2,3-bis((1,1,1,3,3,3-hexafluoropropan-2-yl)oxy)-6-methoxyindolin-1-yl)ethan-1-one (2e)**

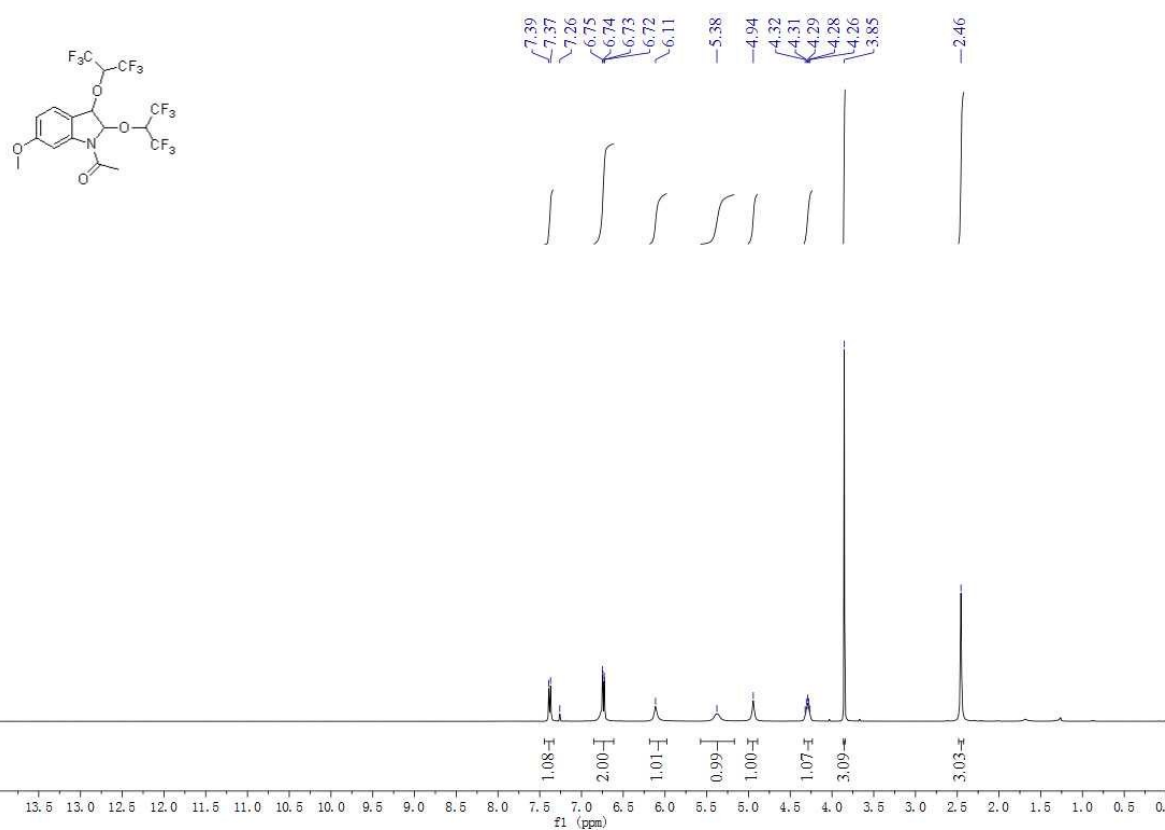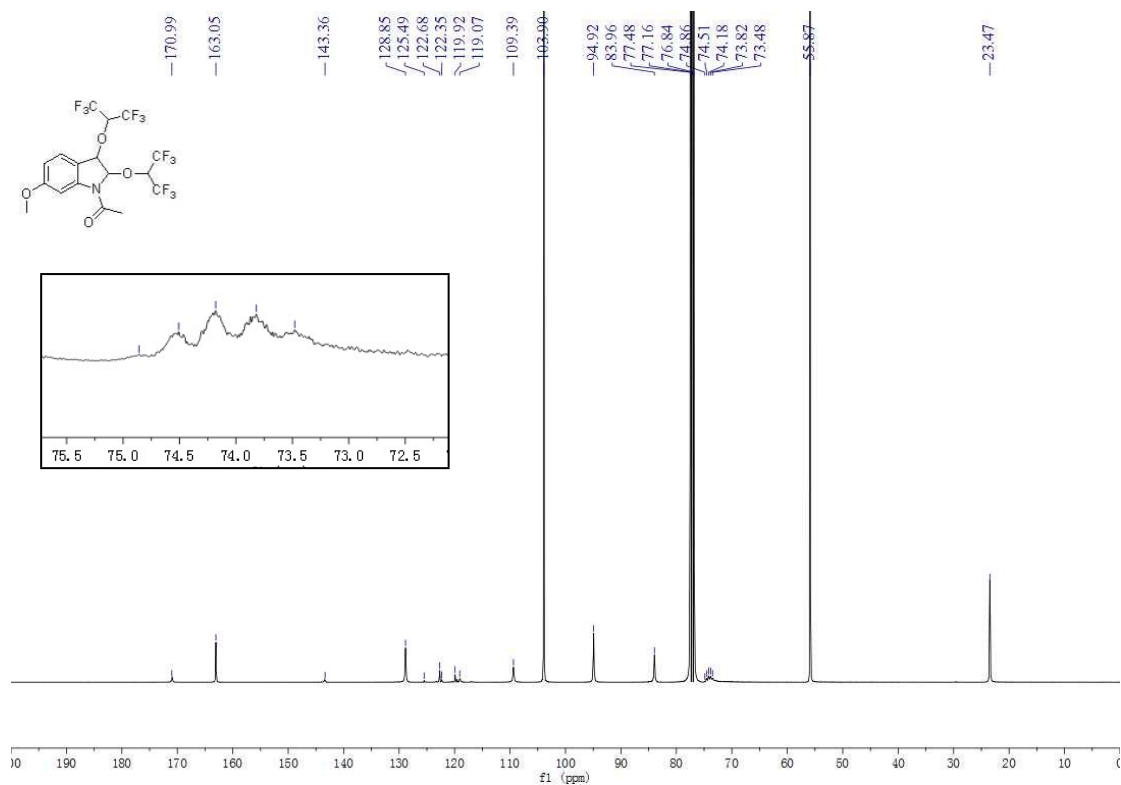

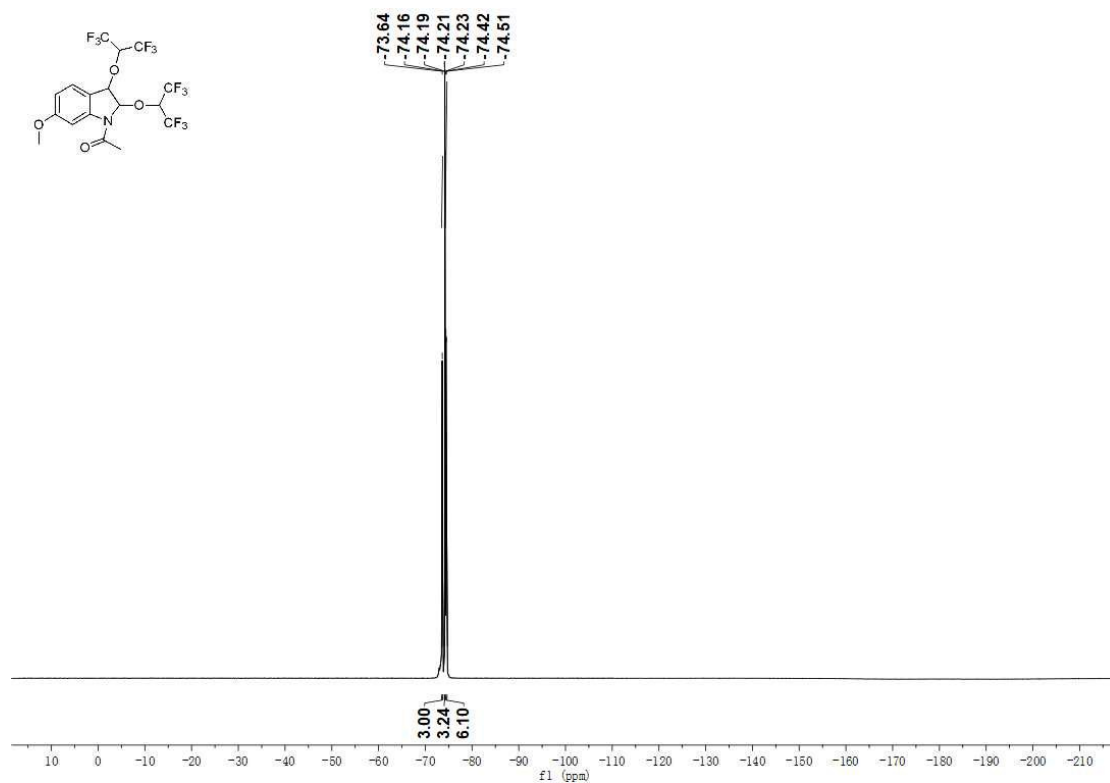

**1-(6-fluoro-2,3-bis((1,1,1,3,3,3-hexafluoroisopropoxy)oxy)indolin-1-yl)ethan-1-one (2f)**

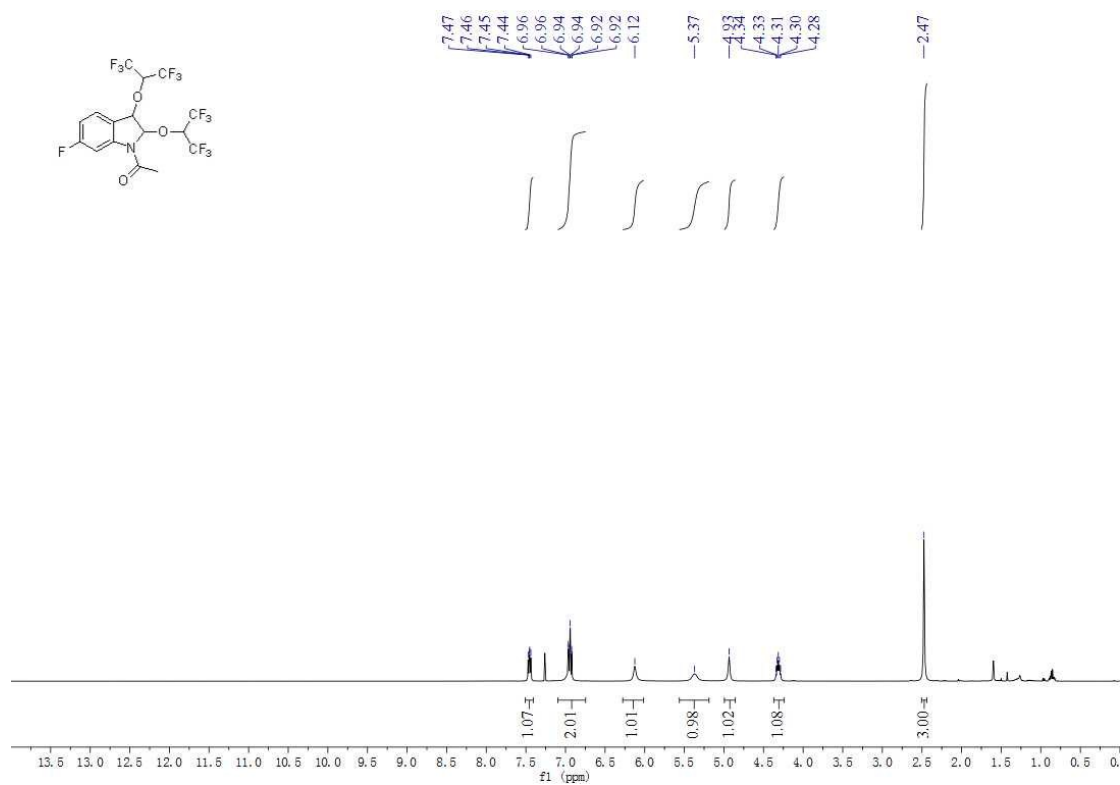

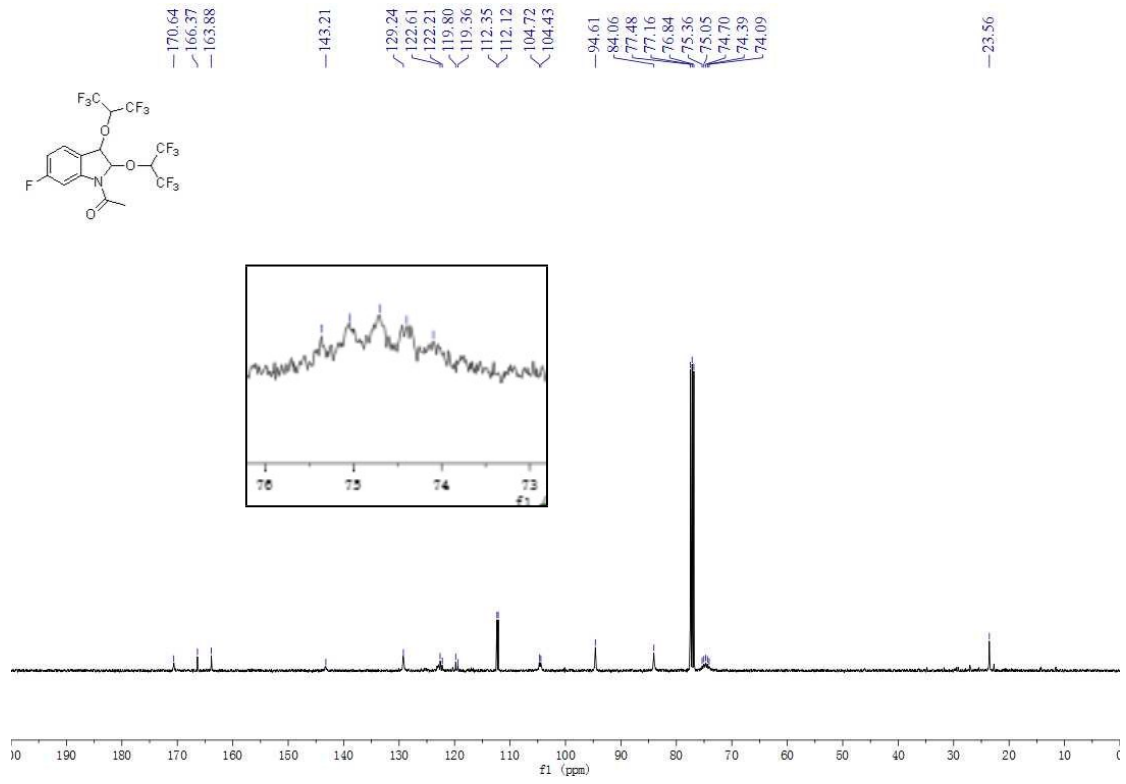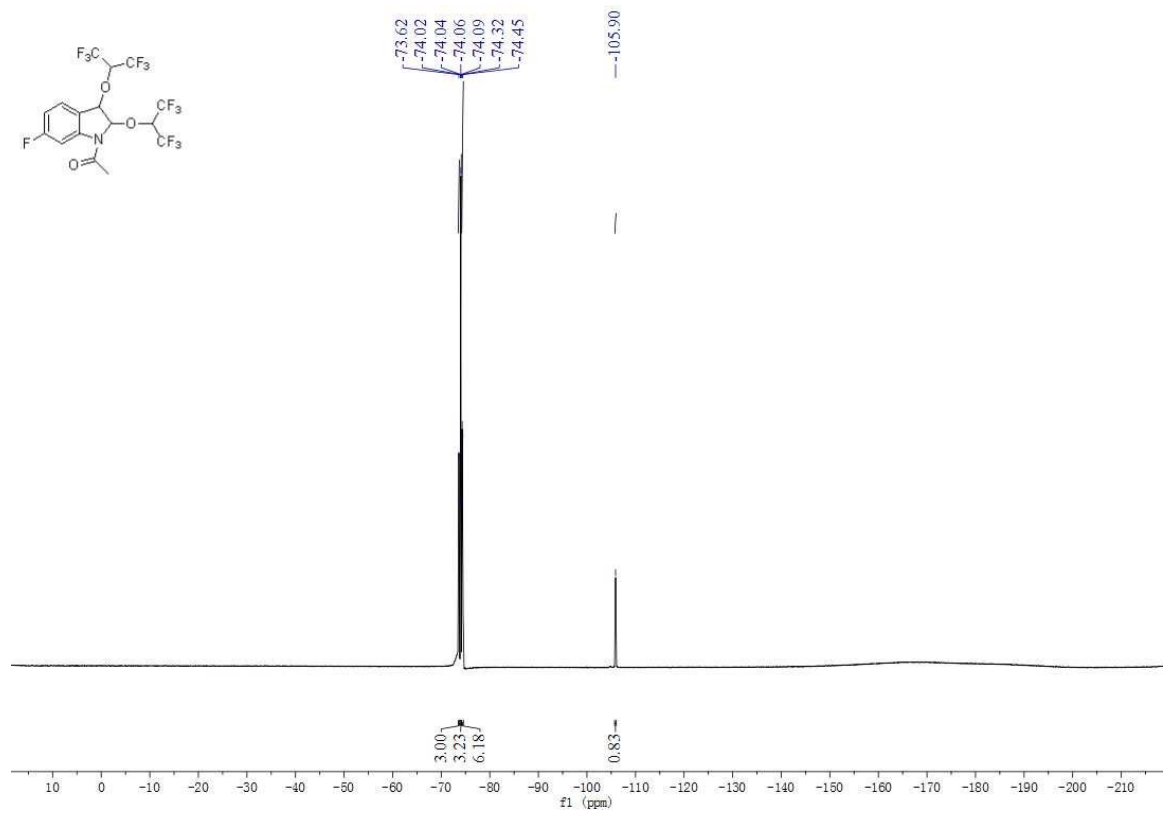

**1-(6-chloro-2,3-bis((1,1,1,3,3,3-hexafluoropropan-2-yl)oxy)indolin-1-yl)ethan-1-one (2g)**

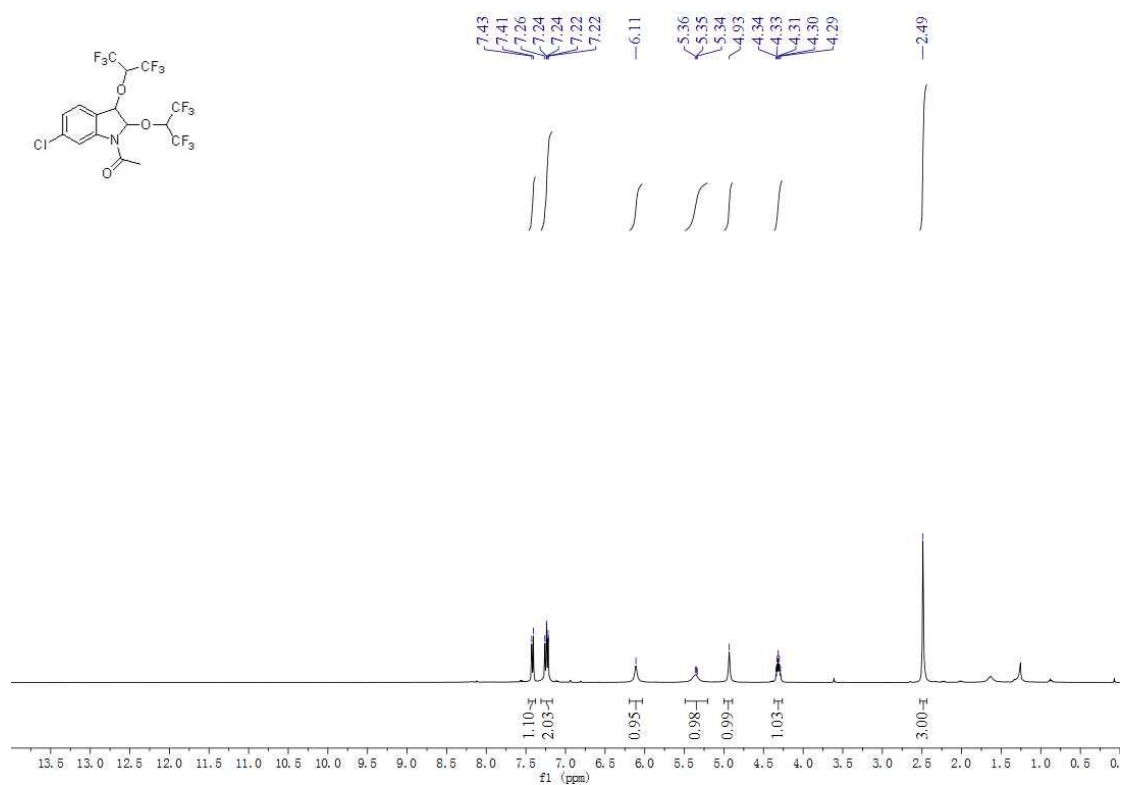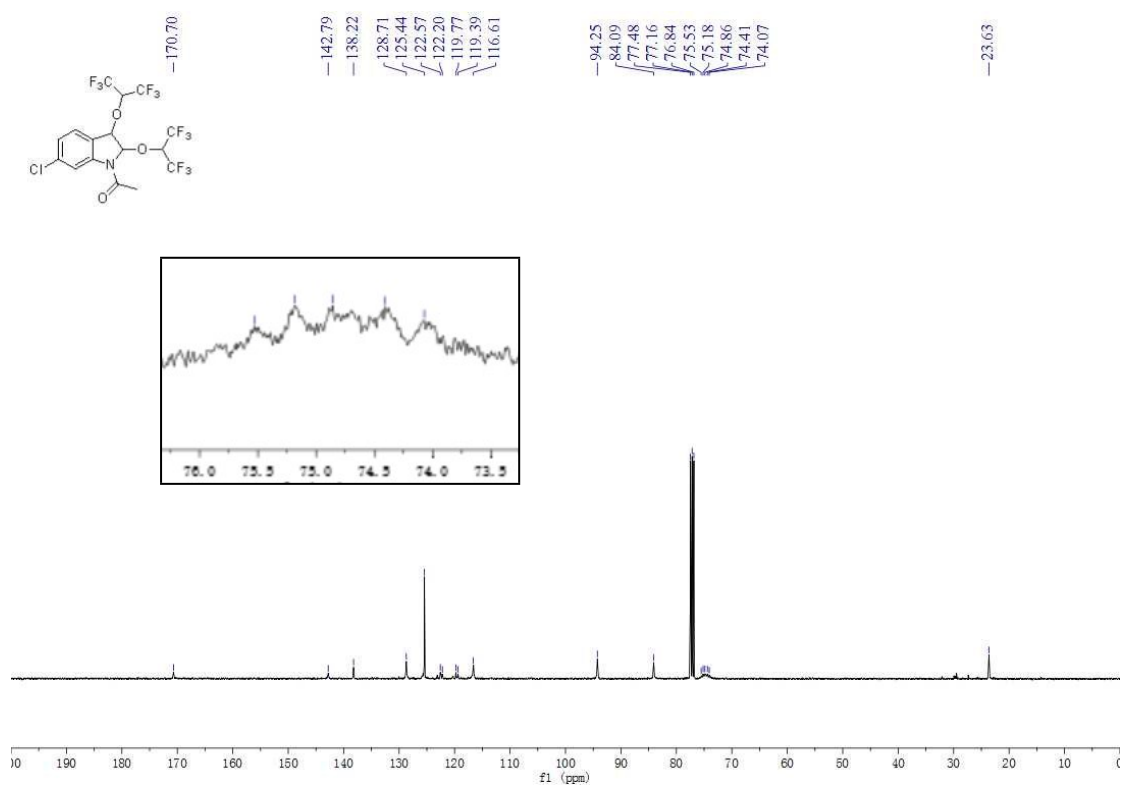

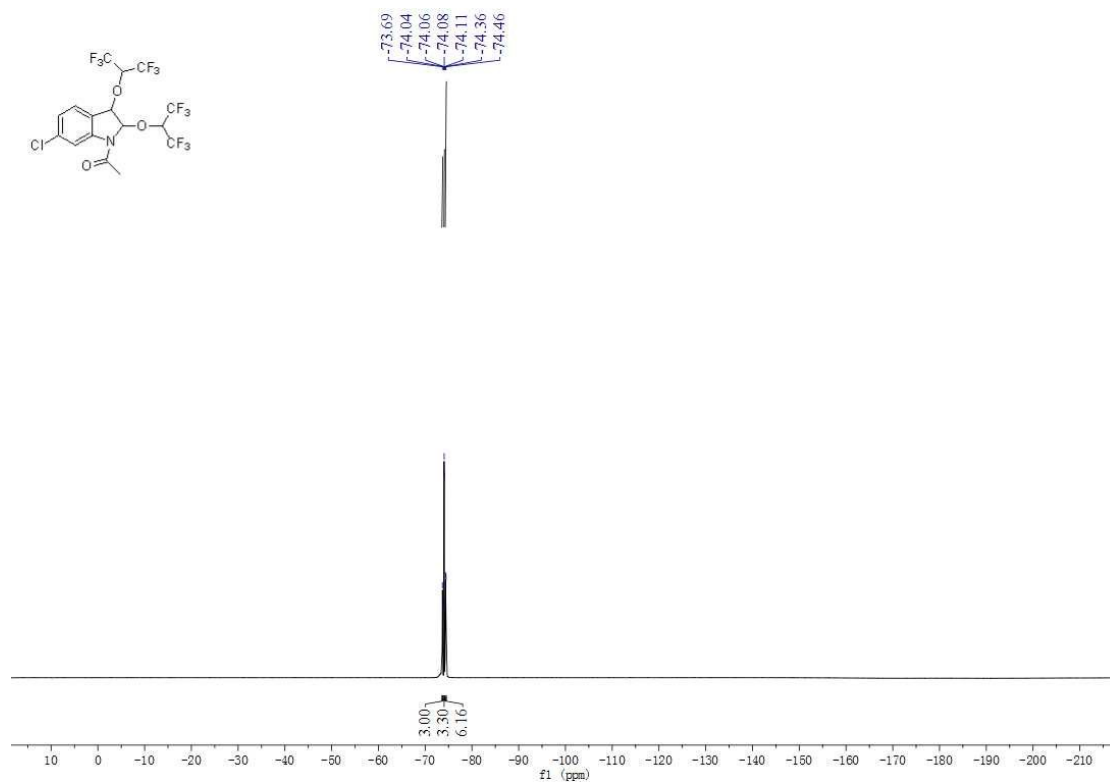

**1-(6-bromo-2,3-bis((1,1,1,3,3,3-hexafluoroisopropoxy)oxy)indolin-1-yl)ethan-1-one (2h)**

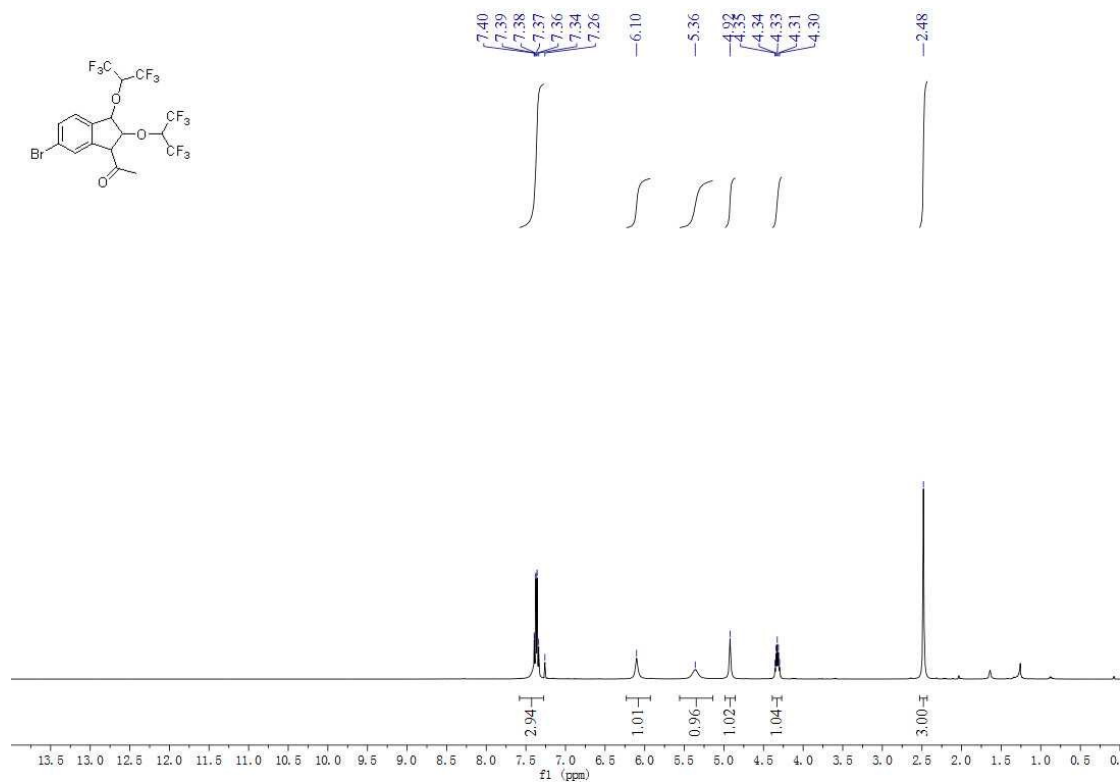

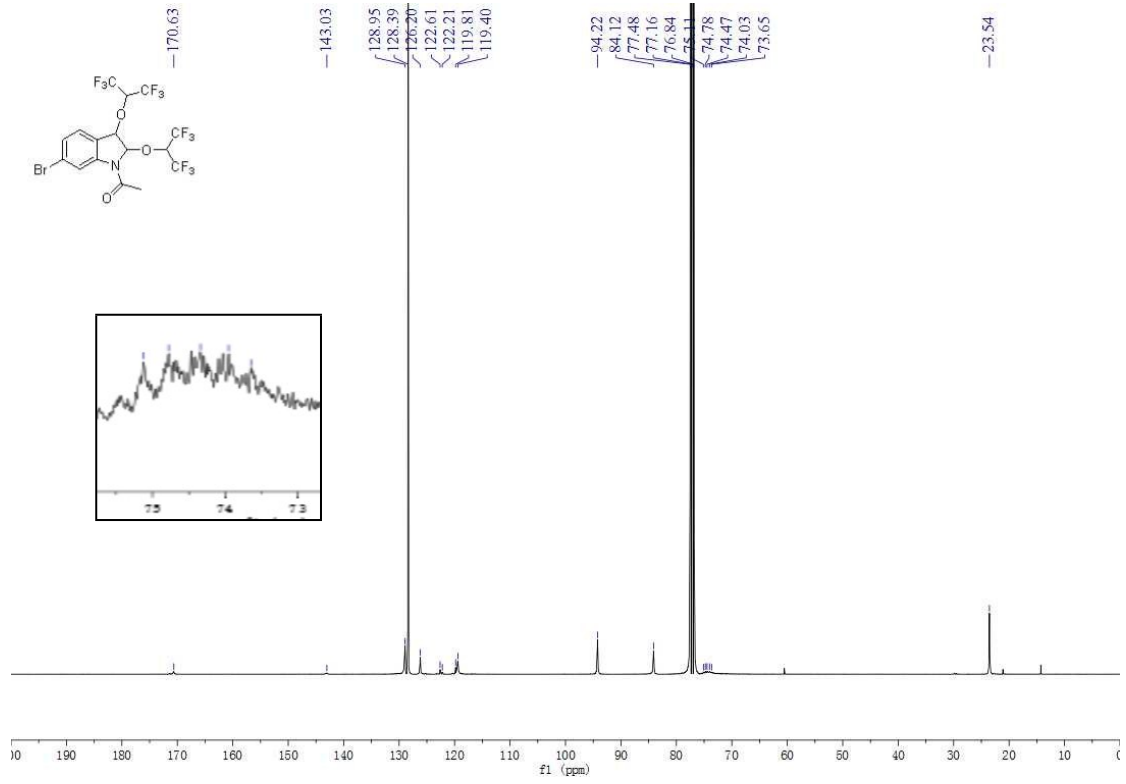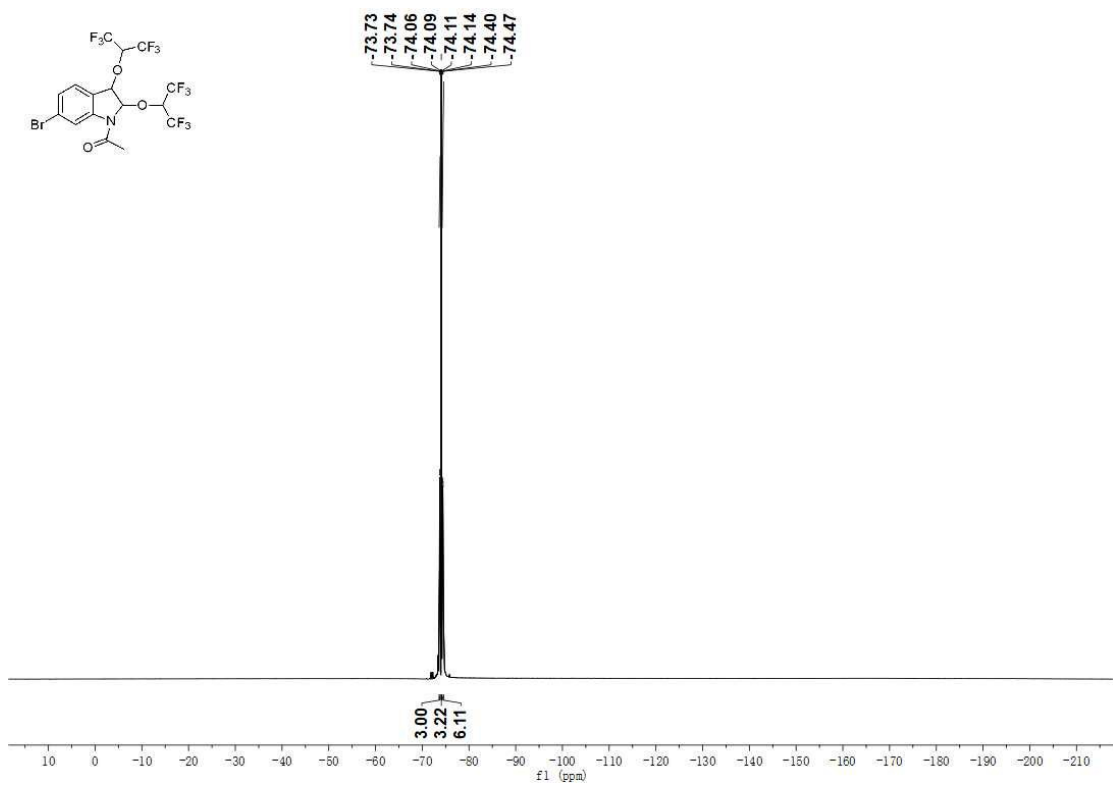

**1-acetyl-2,3-bis((1,1,1,3,3,3-hexafluoropropan-2-yl)oxy)indoline-6-carbonitrile (2i)**

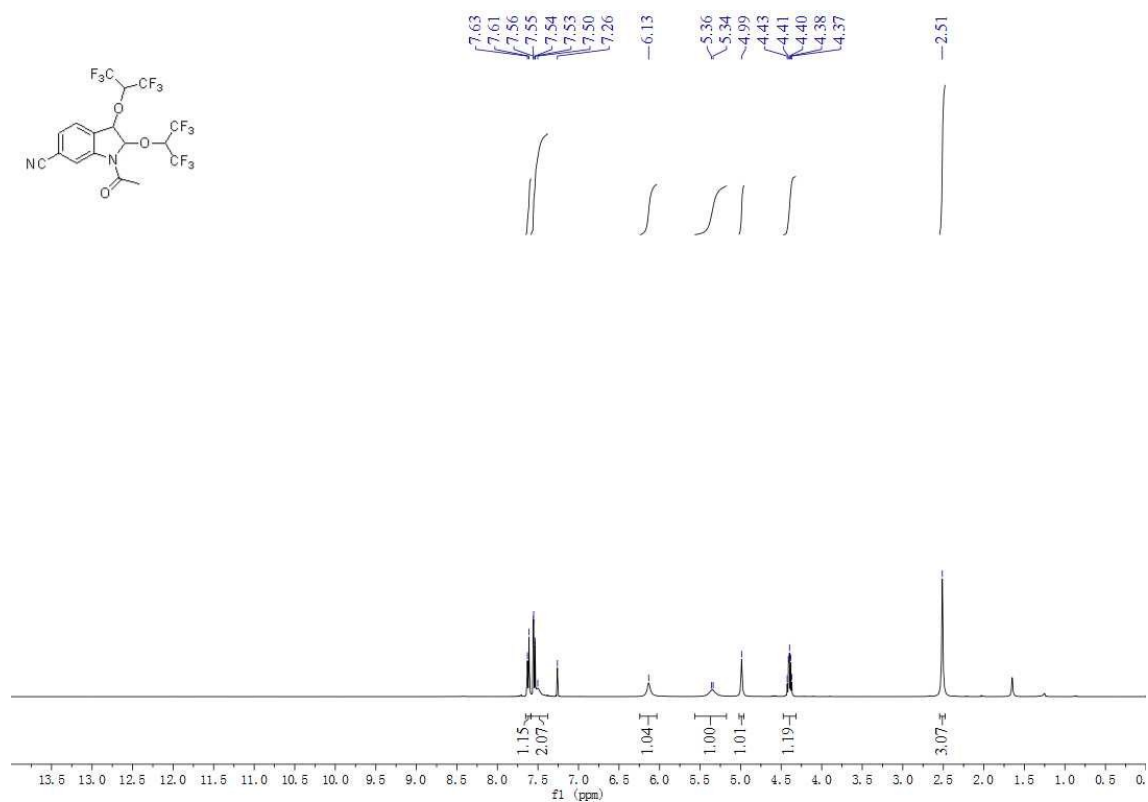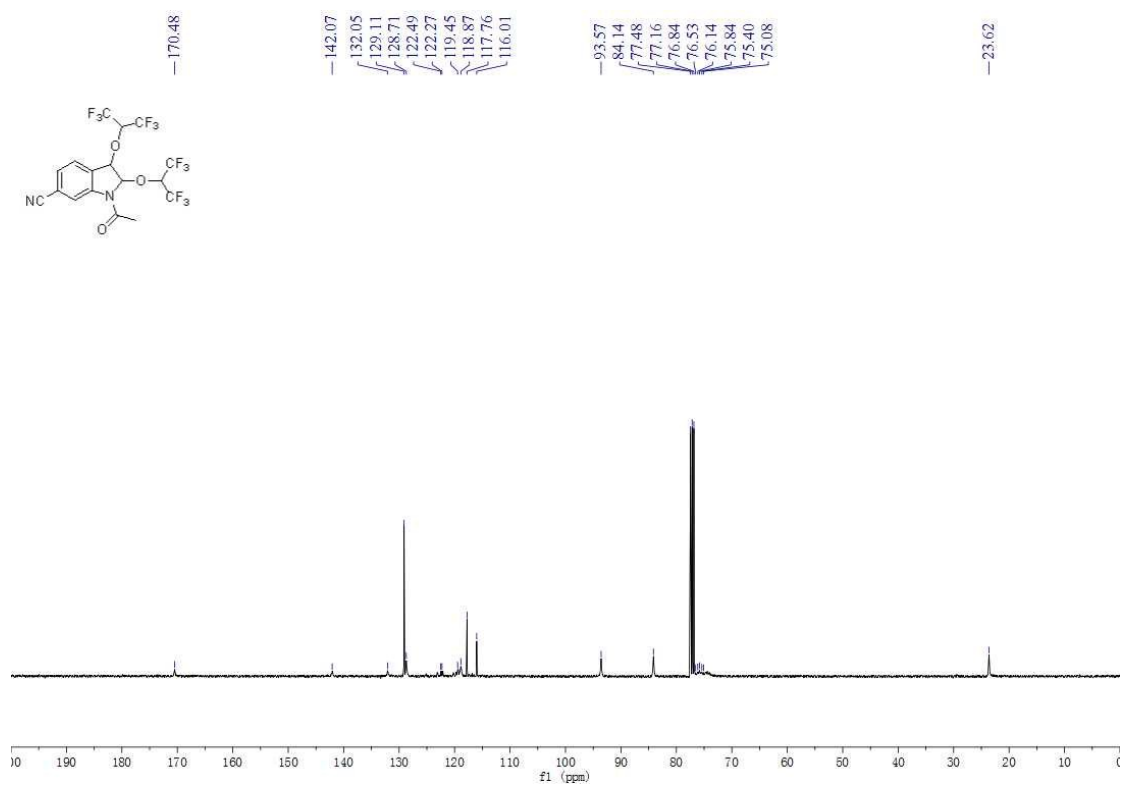

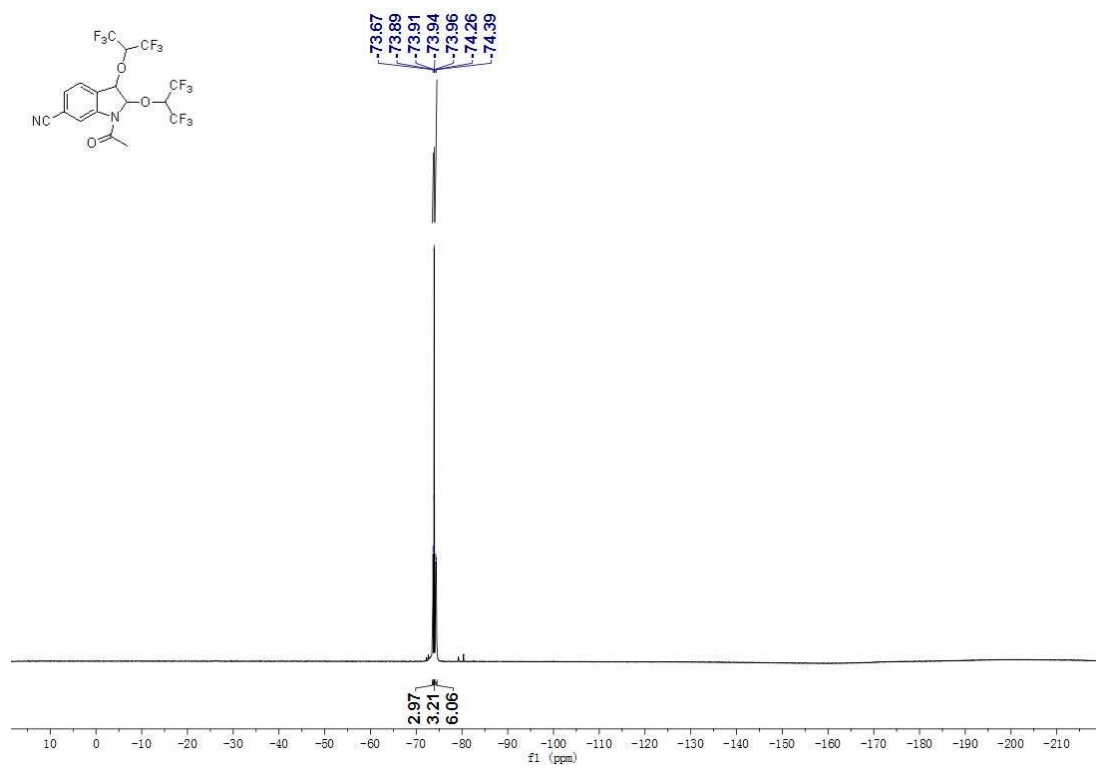

**methyl 1-acetyl-2,3-bis((1,1,1,3,3,3-hexafluoropropan-2-yl)oxy)indoline-6-carboxylate (2j)**

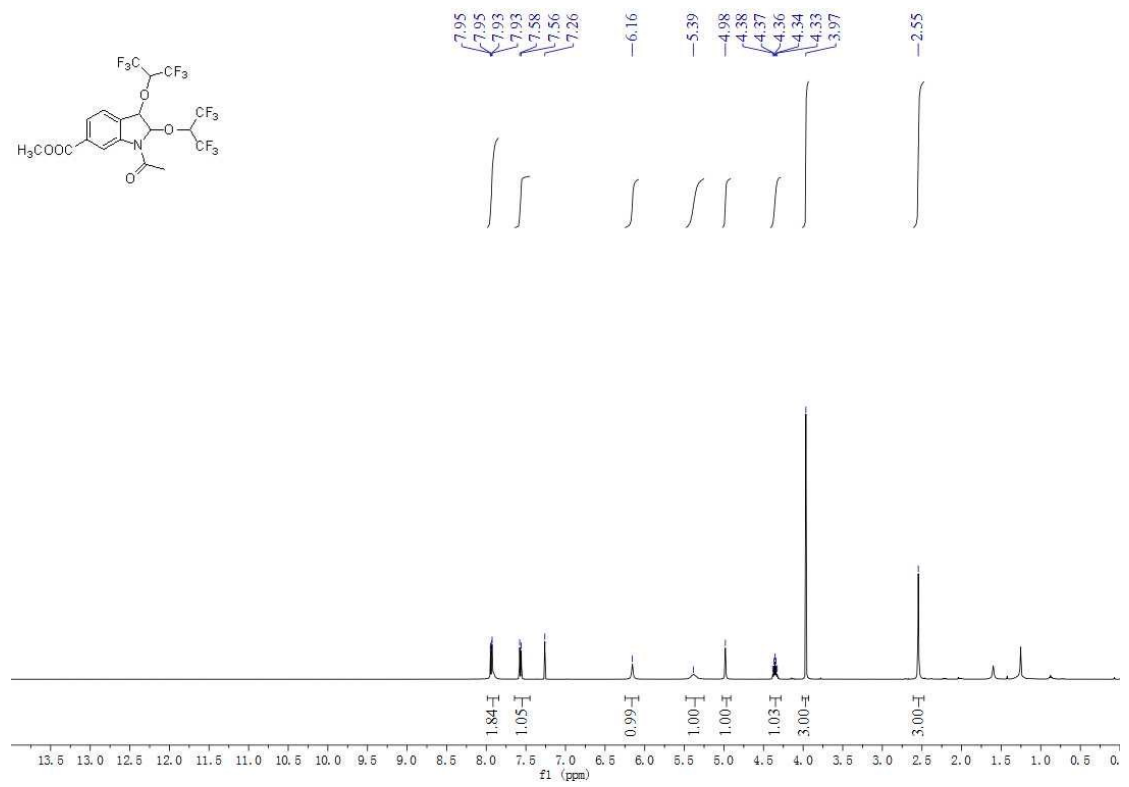



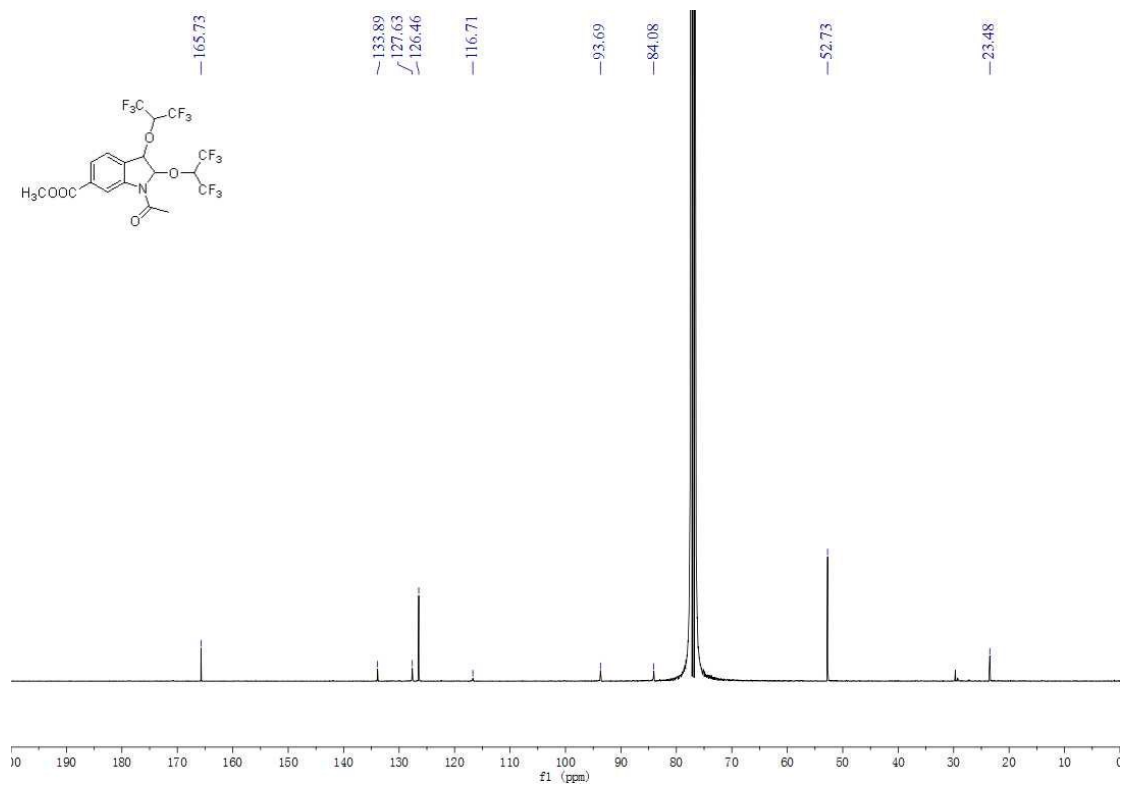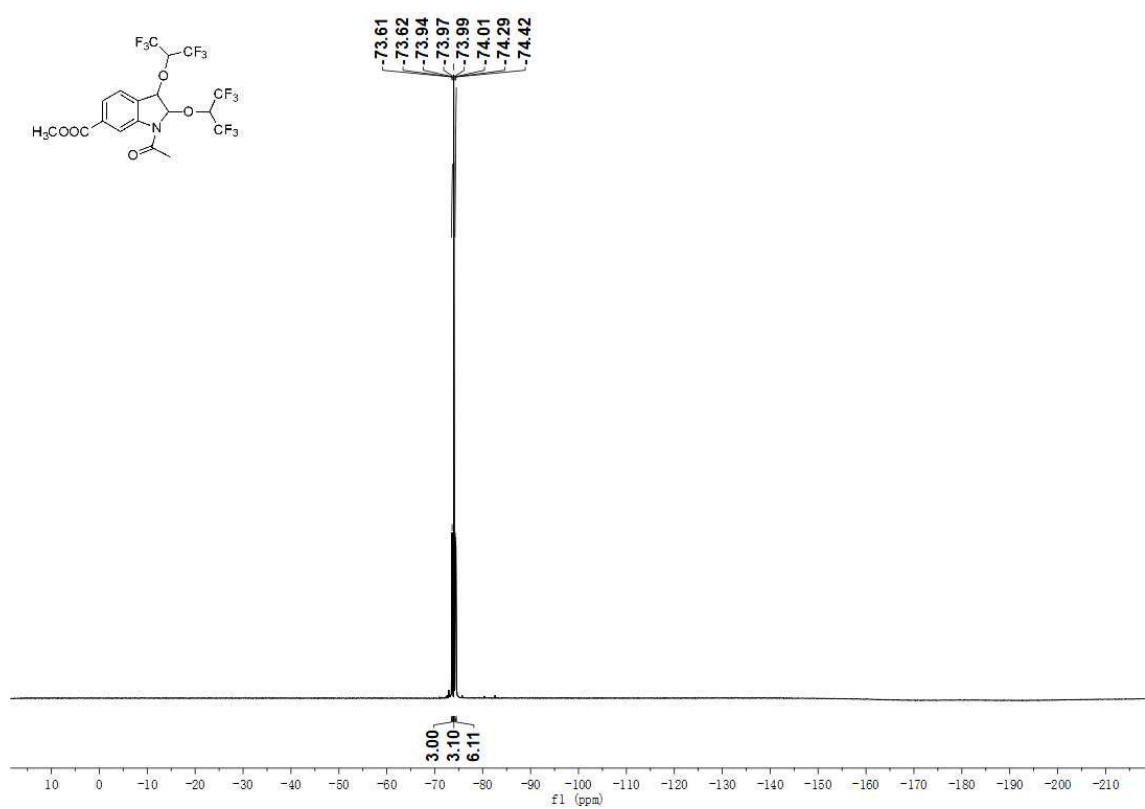

**1-(2-((1,1,1,3,3,3-hexafluoropropan-2-yl)oxy)-3-methyl-1H-indol-1-yl)ethan-1-one (2k)**

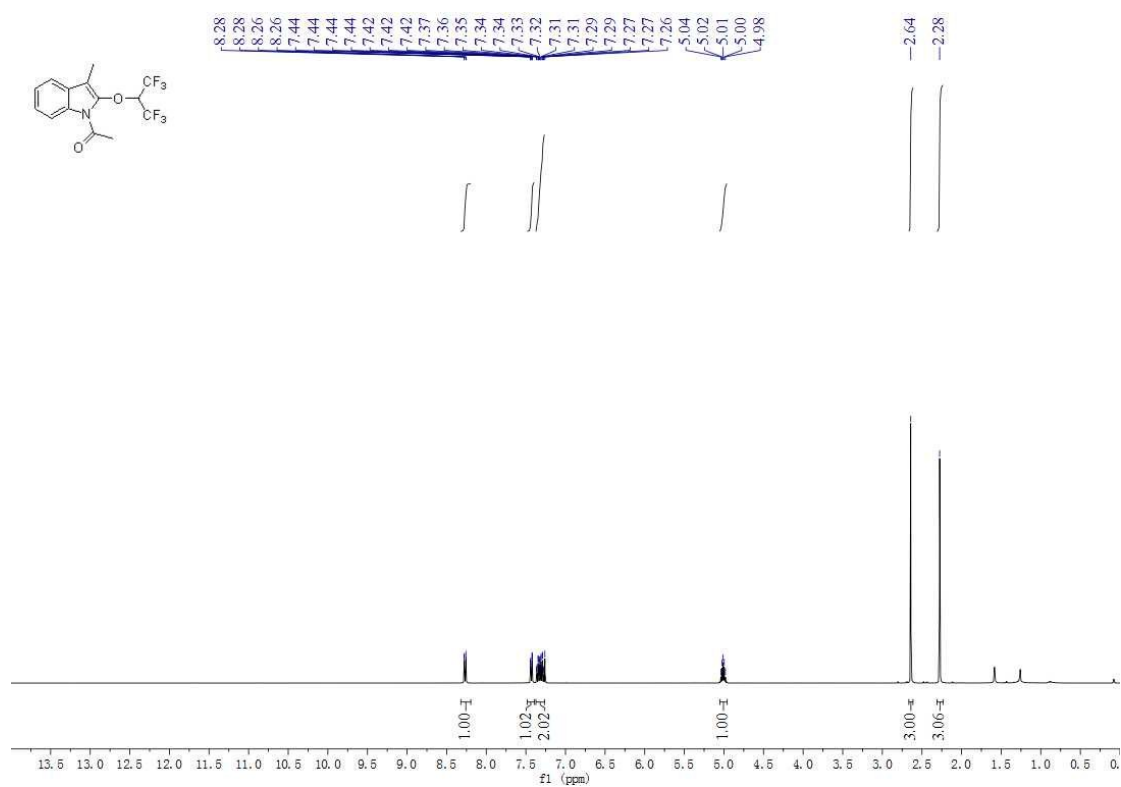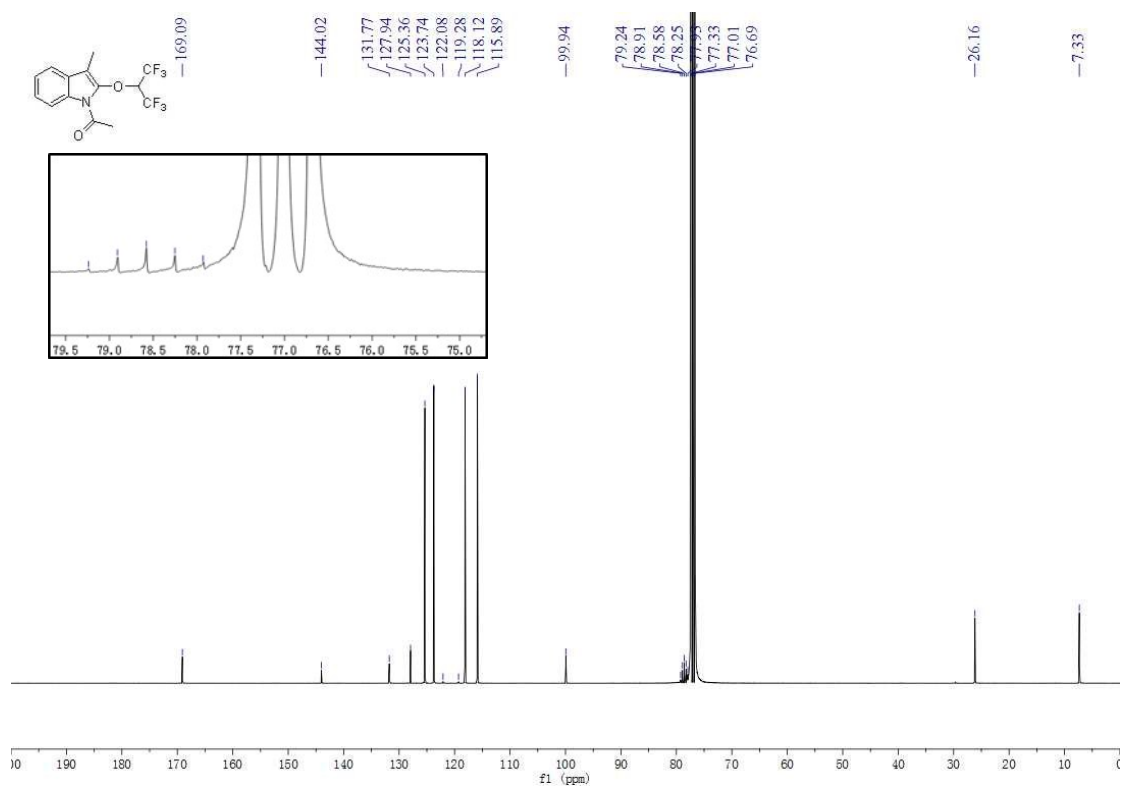

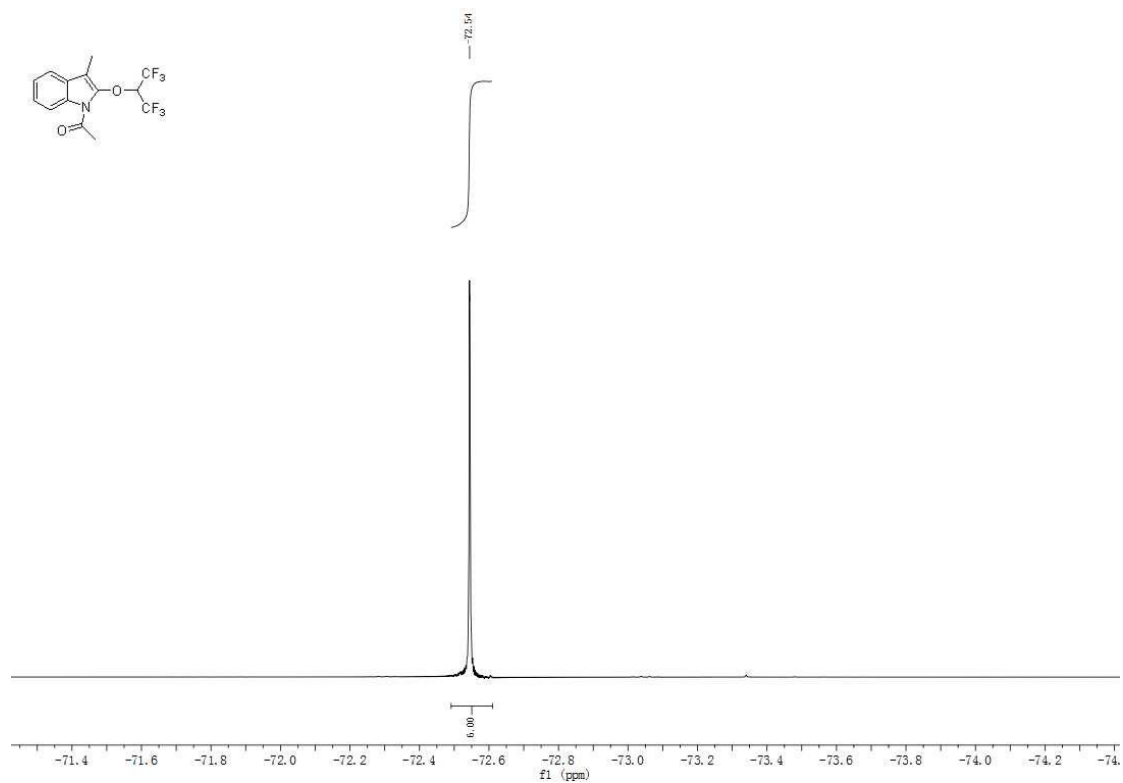

**2,3-bis((1,1,1,3,3,3-hexafluoropropan-2-yl)oxy)-1-tosylindoline (2l)**

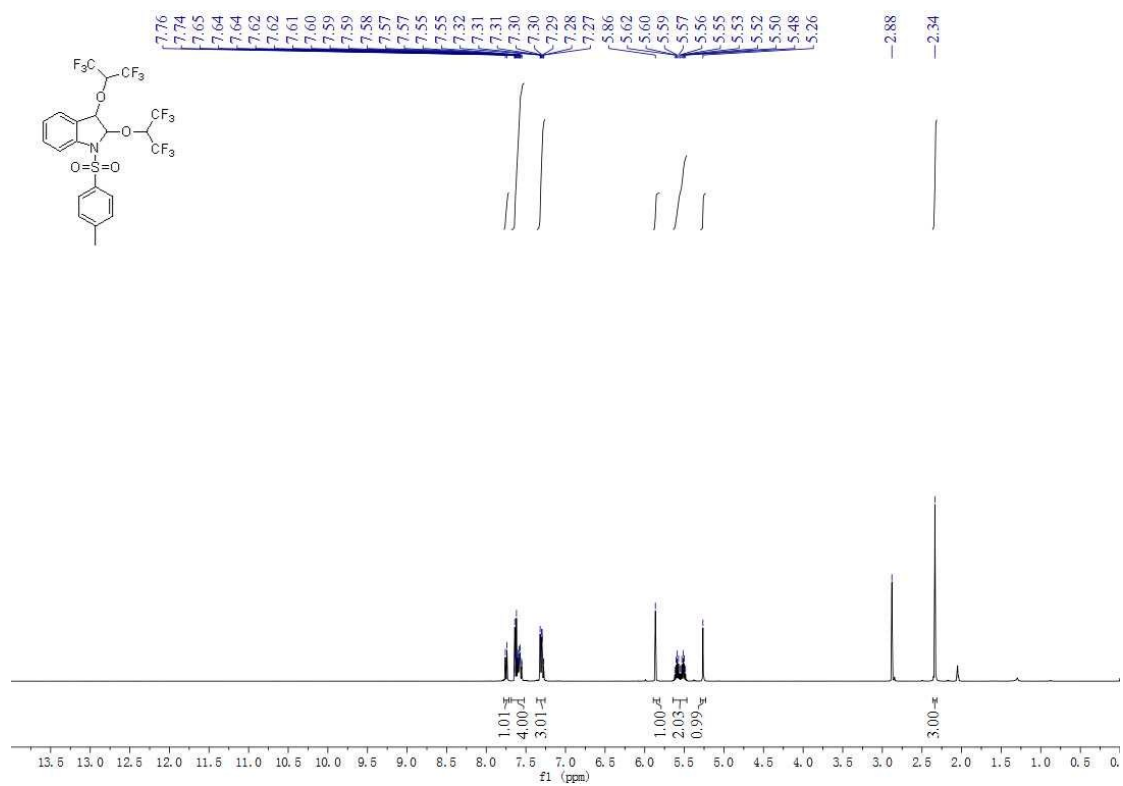

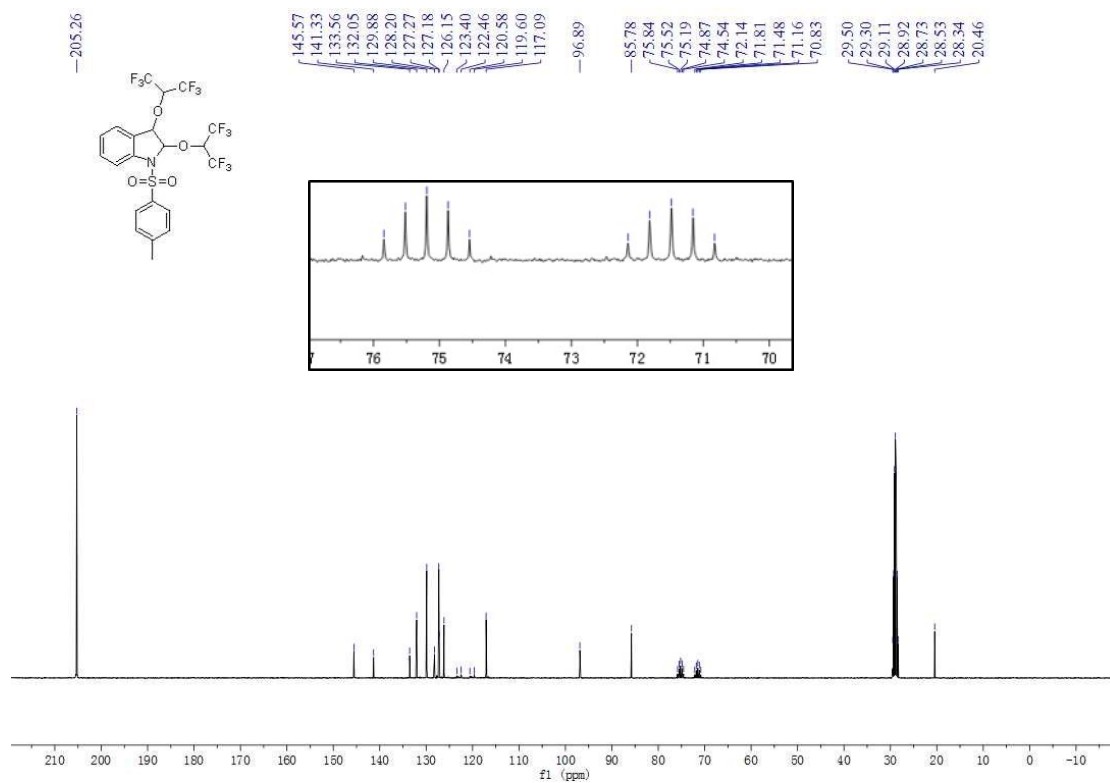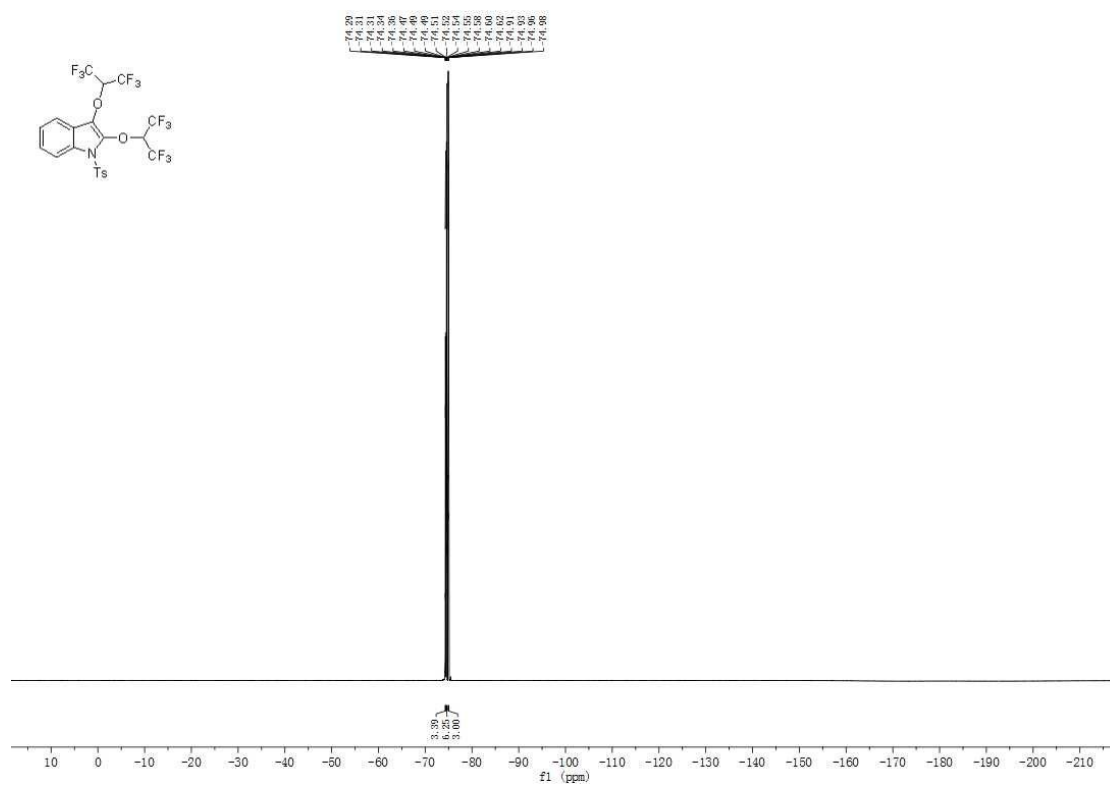

**N-(2-((1,1,1,3,3,3-hexafluoropropan-2-yl)oxy)-4-methoxyphenyl)acetamide (2m)**

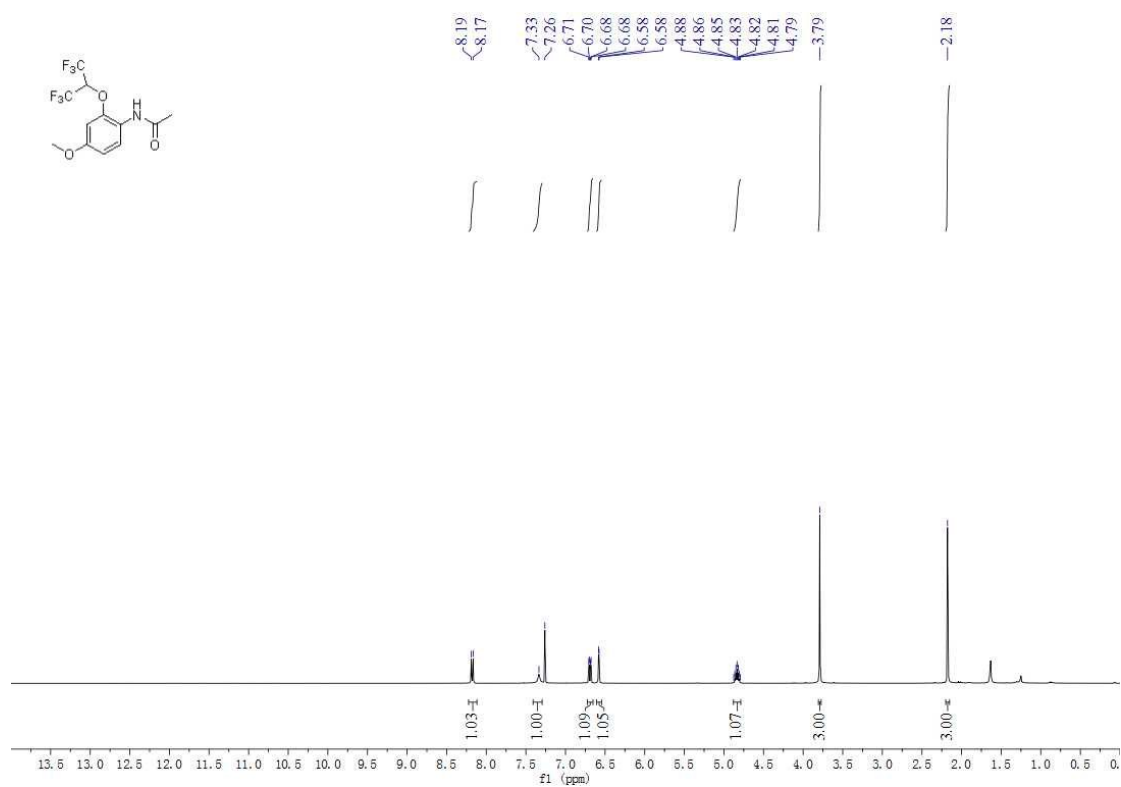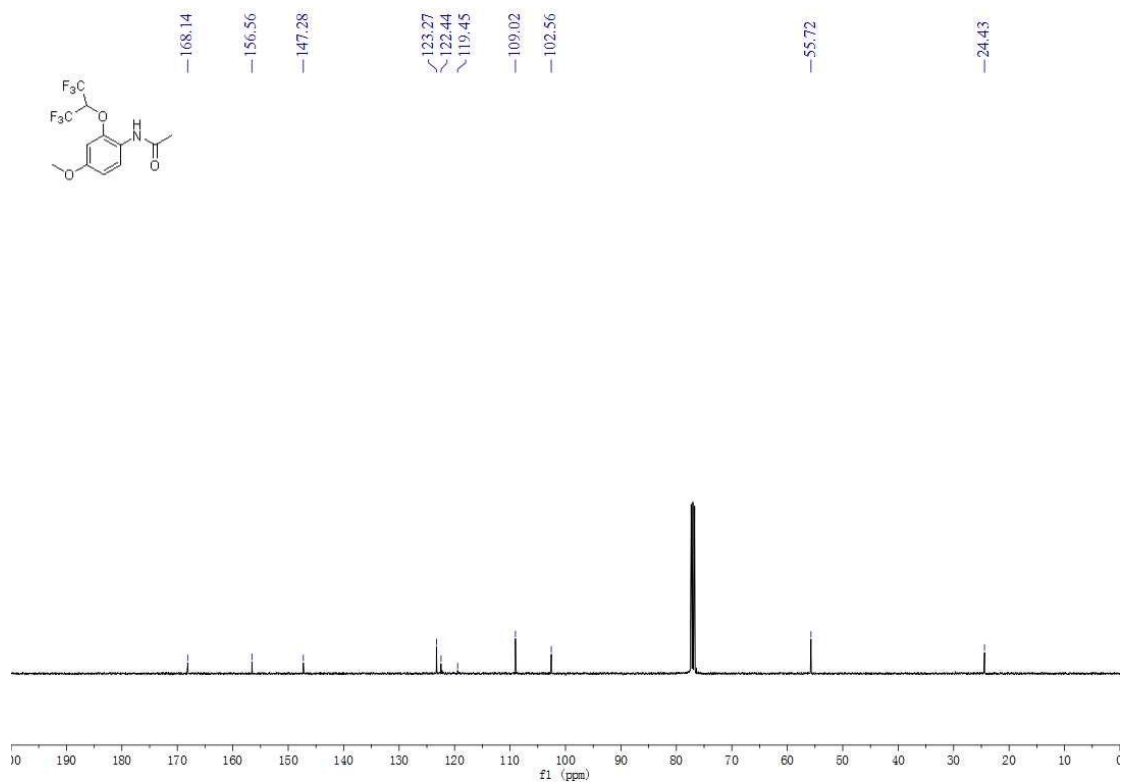

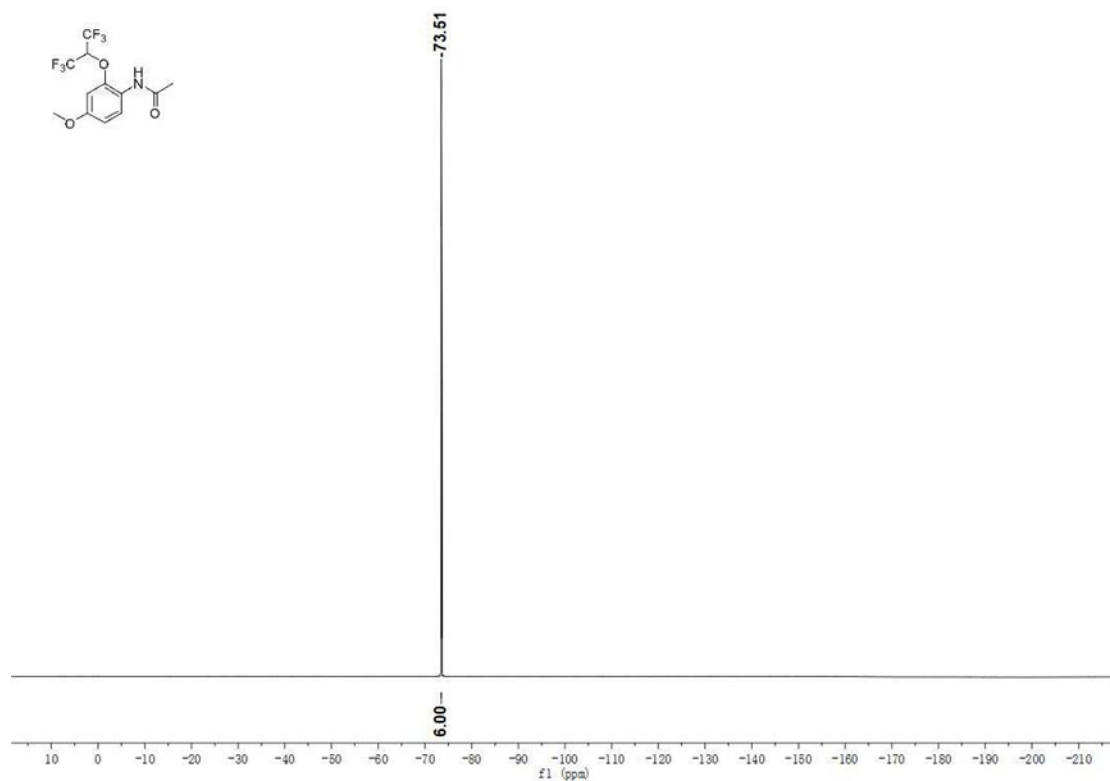

**N-(2-((1,1,1,3,3,3-hexafluoropropan-2-yl)oxy)-4-methoxyphenyl)benzamide (2n)**

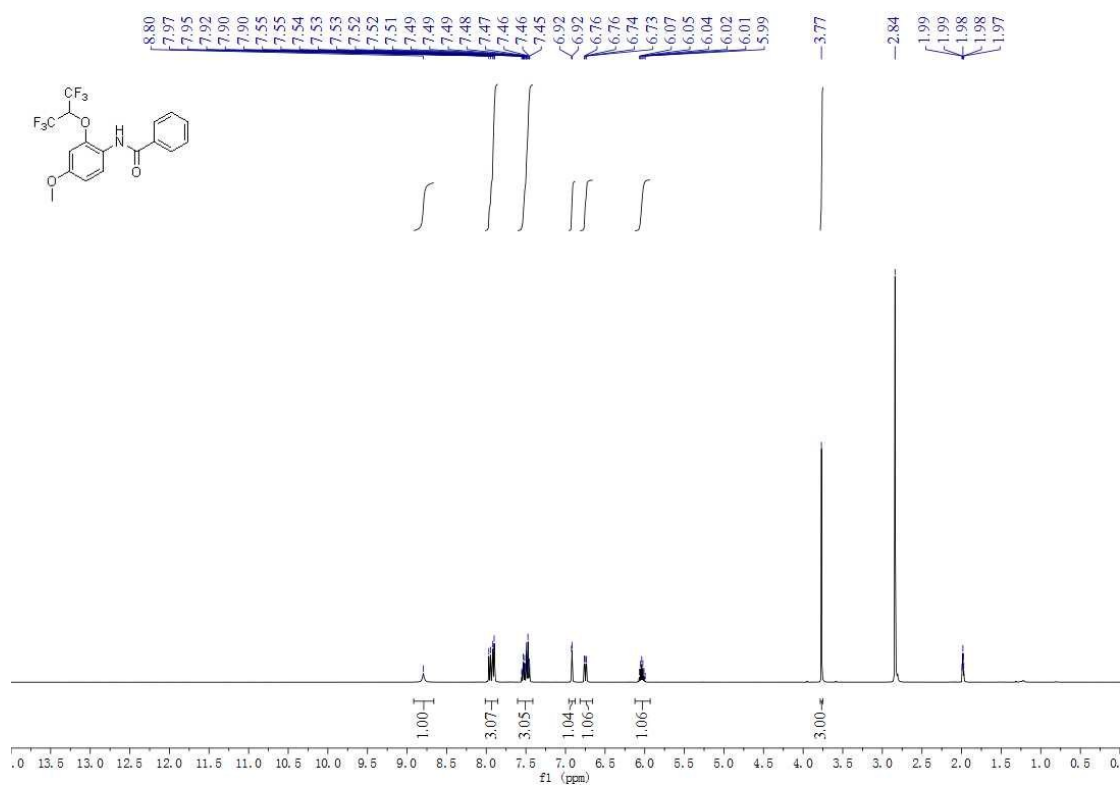

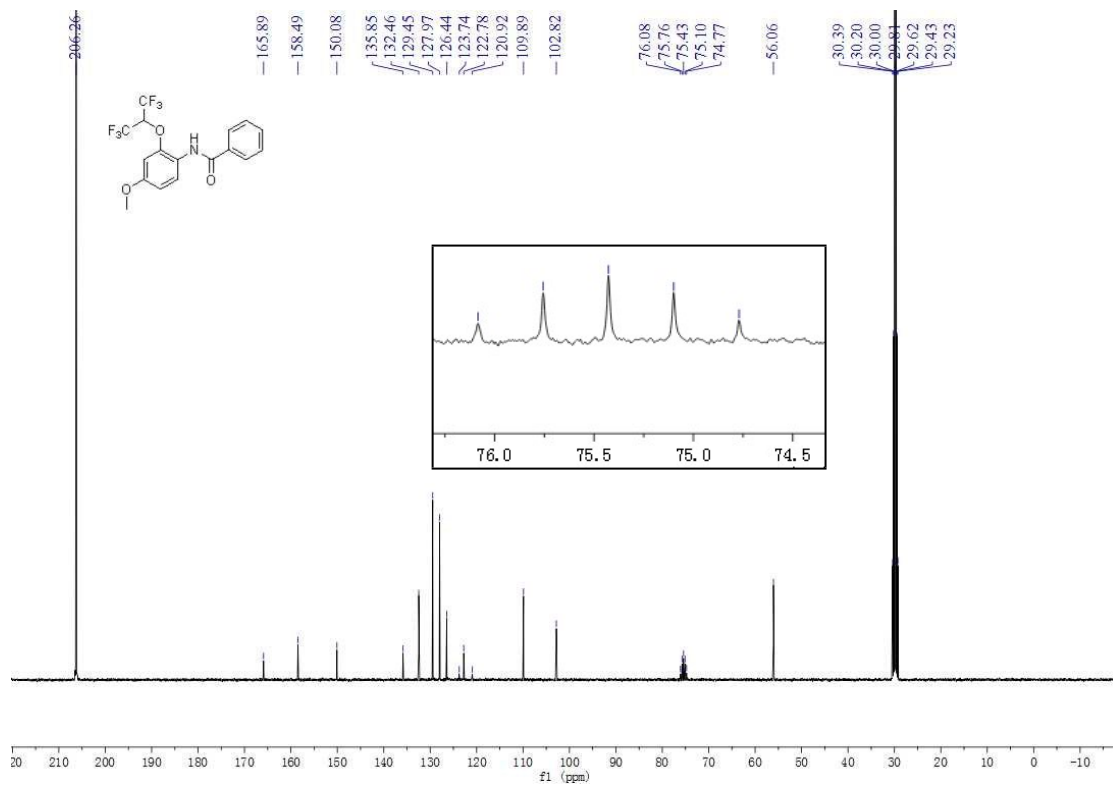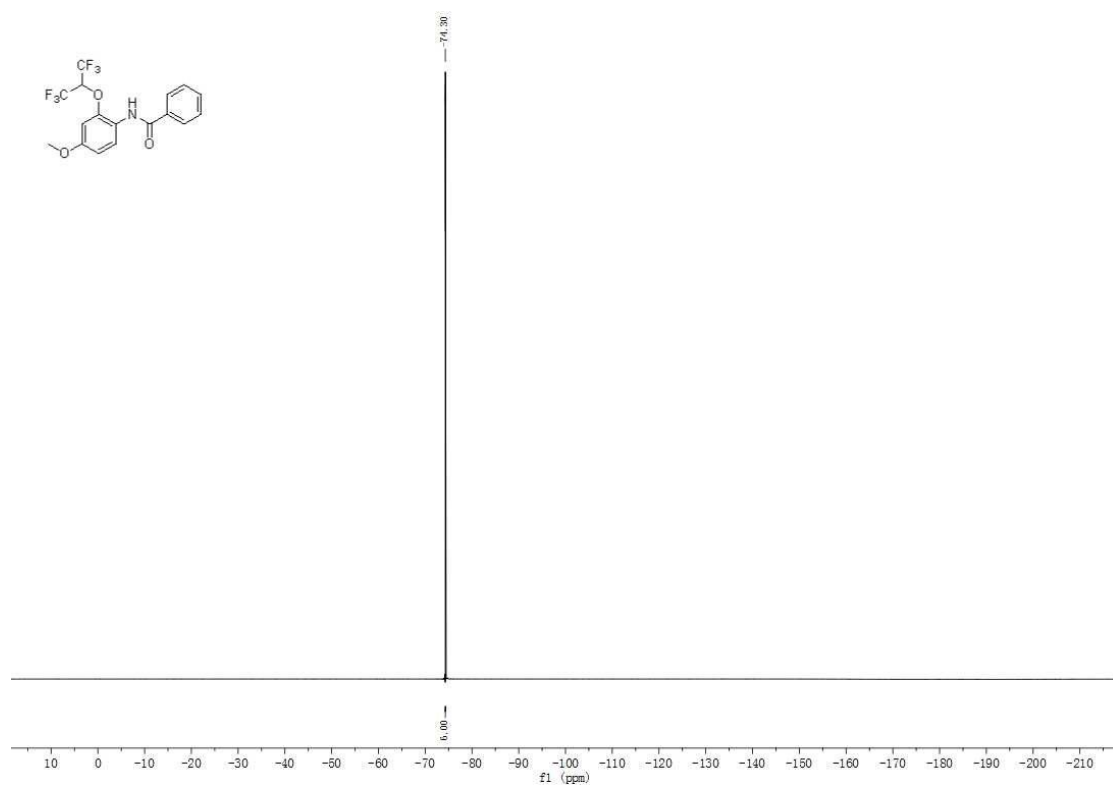

**N-(2-((1,1,1,3,3,3-hexafluoropropan-2-yl)oxy)-4-methoxyphenyl)pivalamide (2o)**

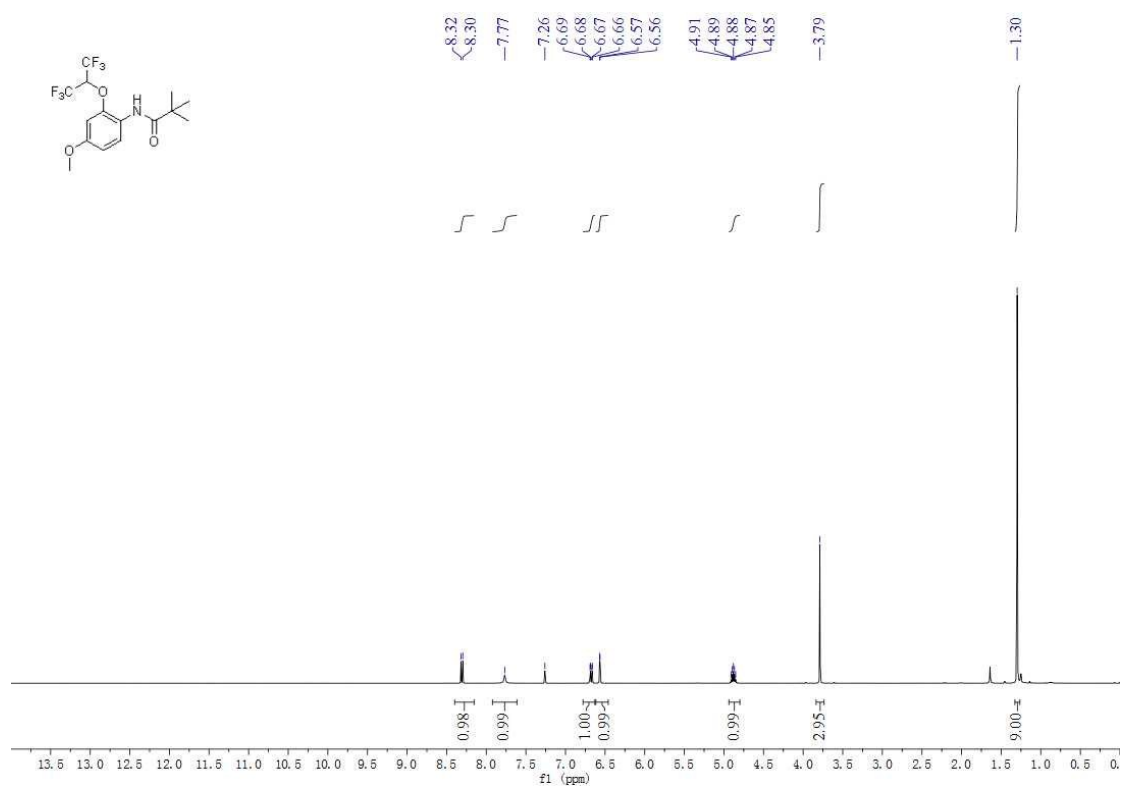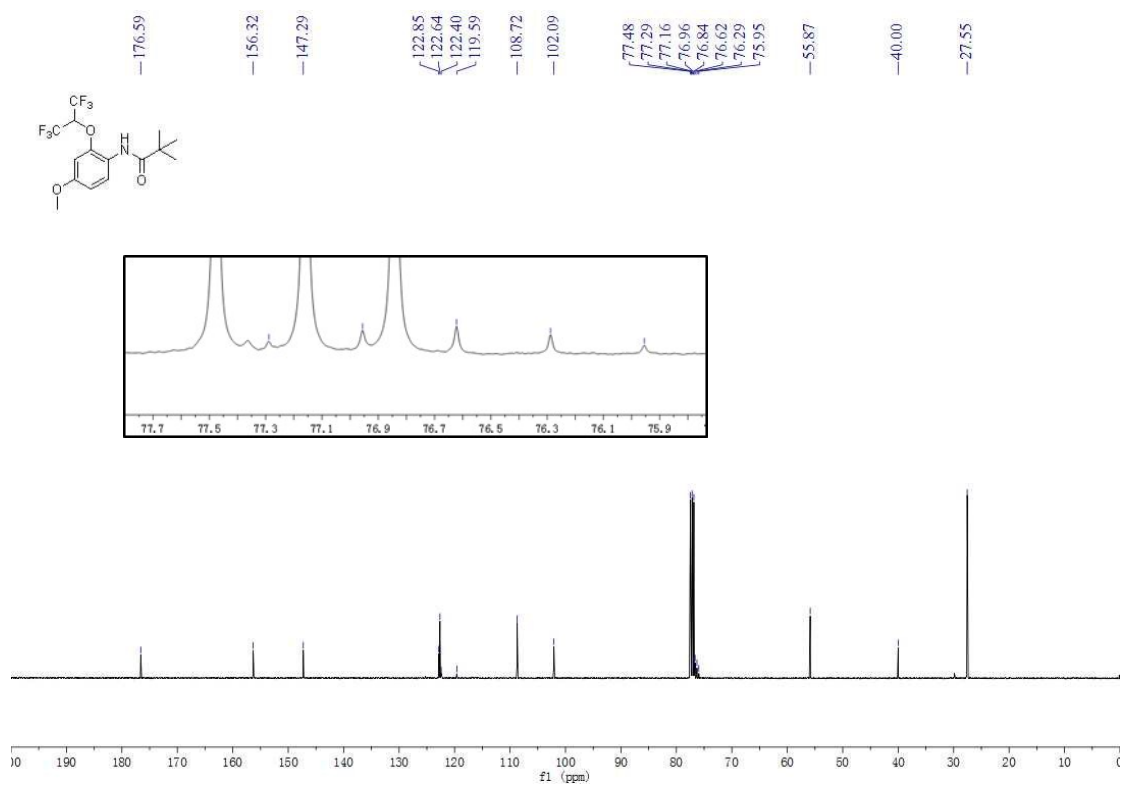



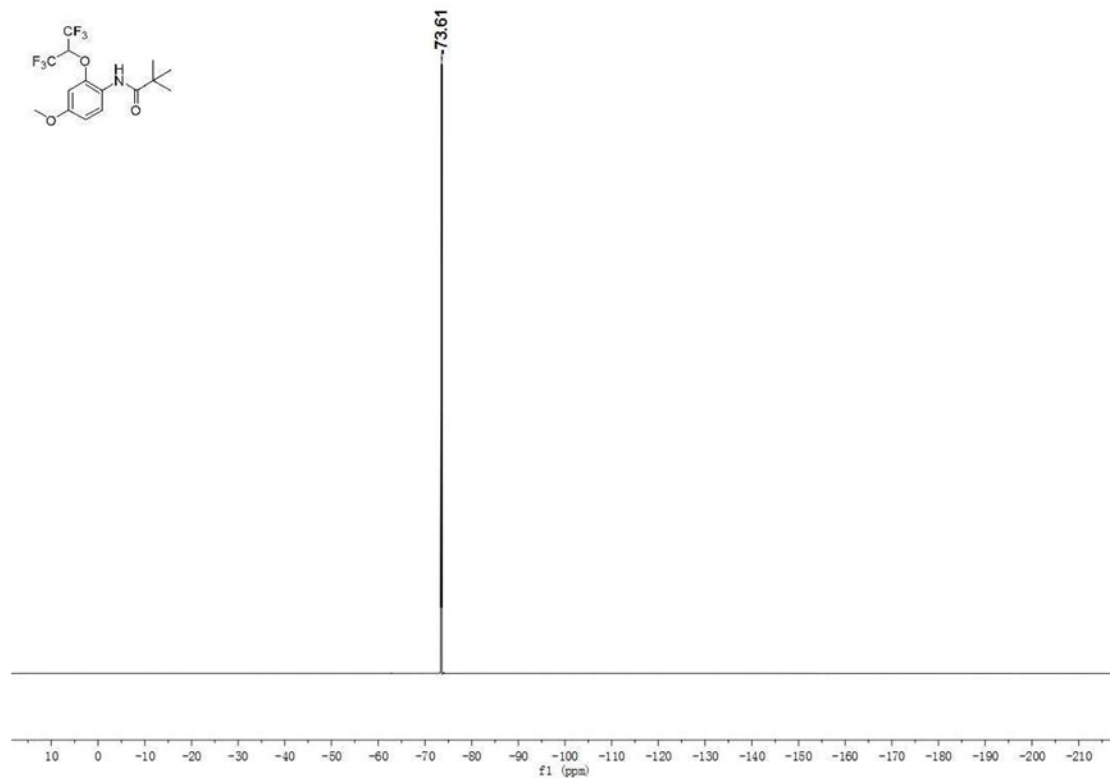

**N-(3-((1,1,1,3,3,3-hexafluoropropan-2-yl)oxy)naphthalen-2-yl)acetamide (2p)**

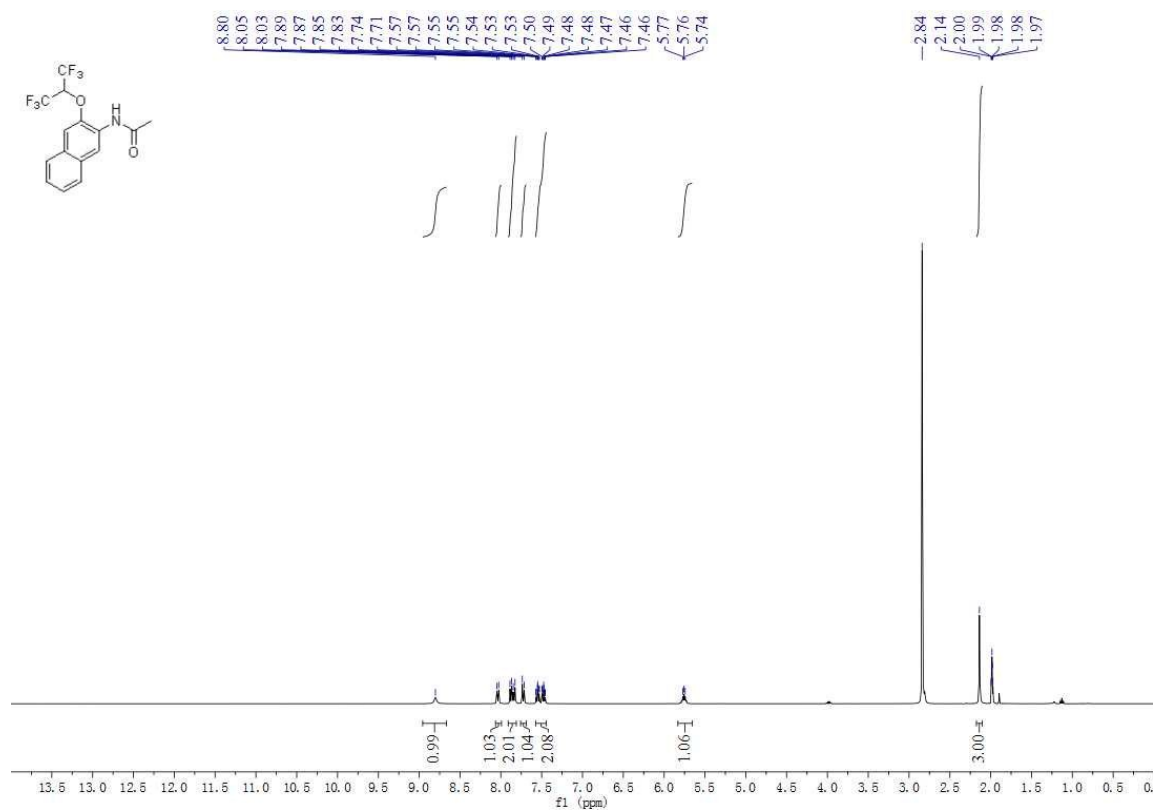

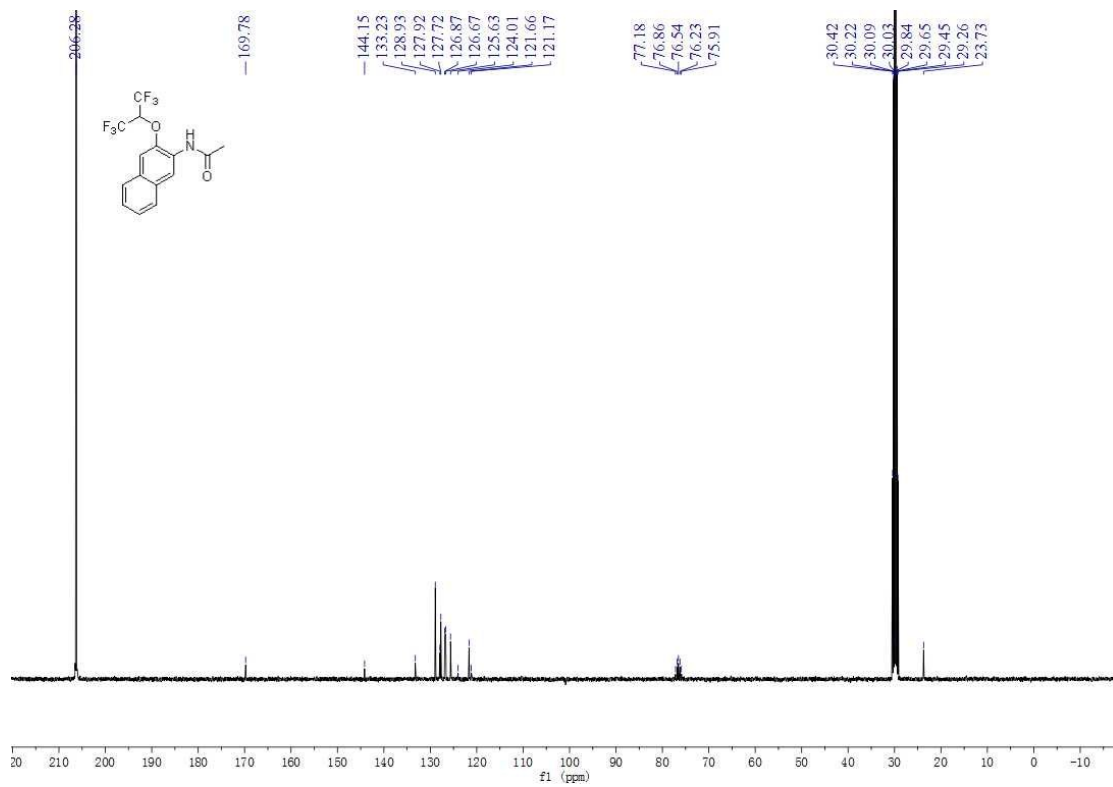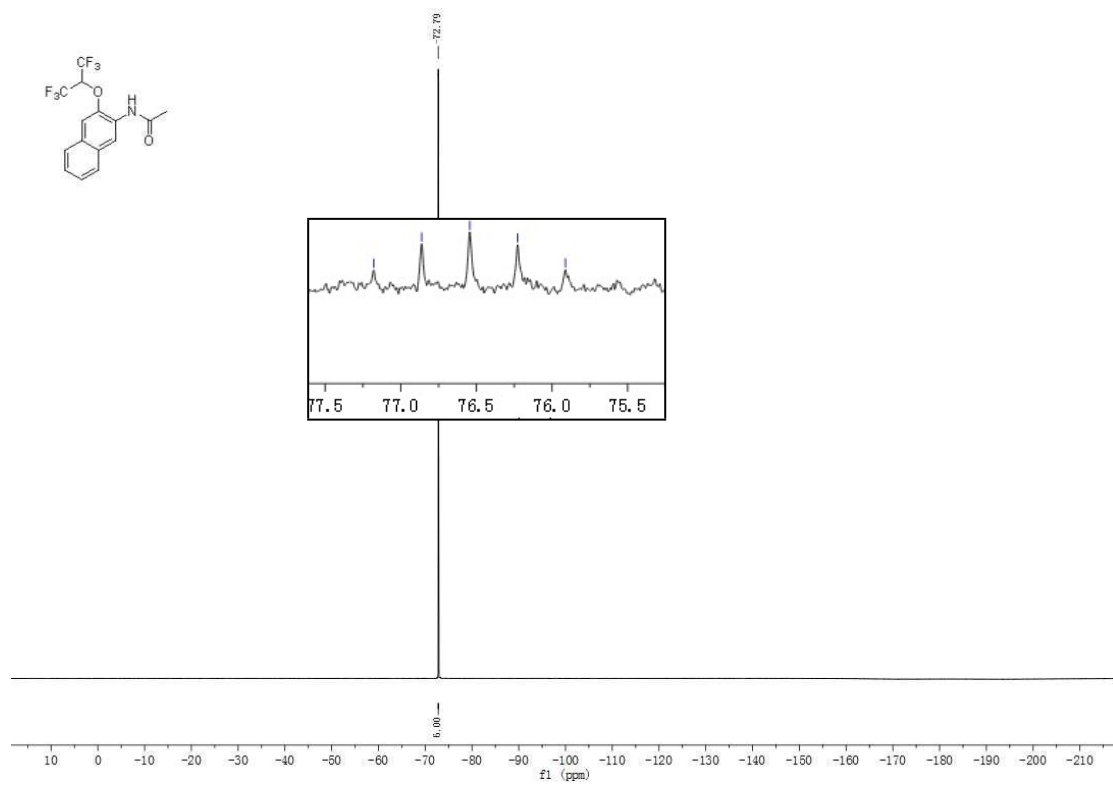

**N-(2-((1,1,1,3,3,3-hexafluoropropan-2-yl)oxy)-4-(methylthio)phenyl)acetamide (2q)**

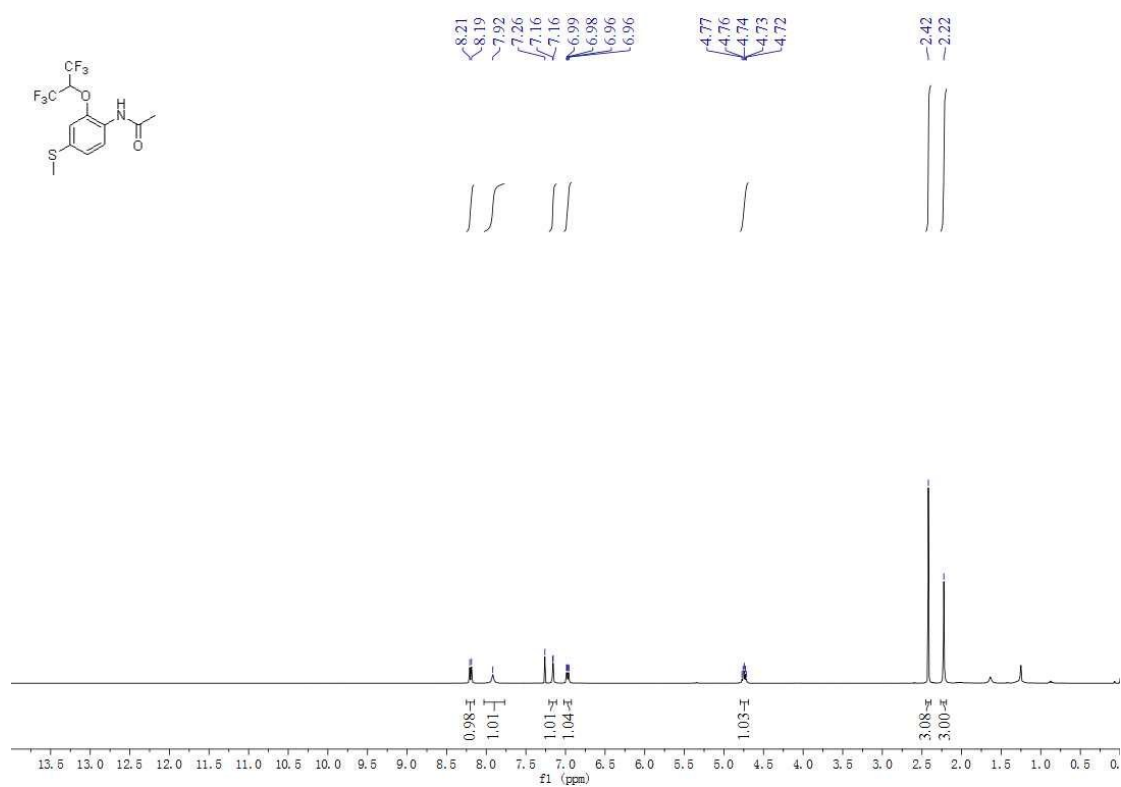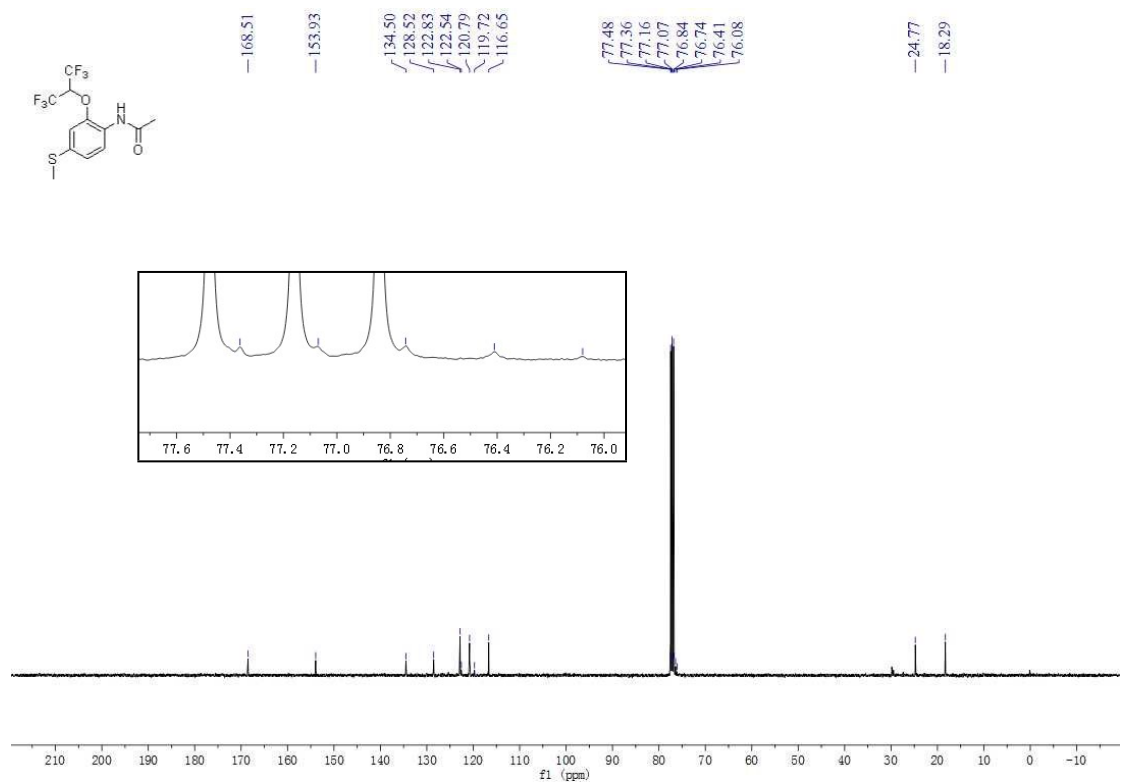

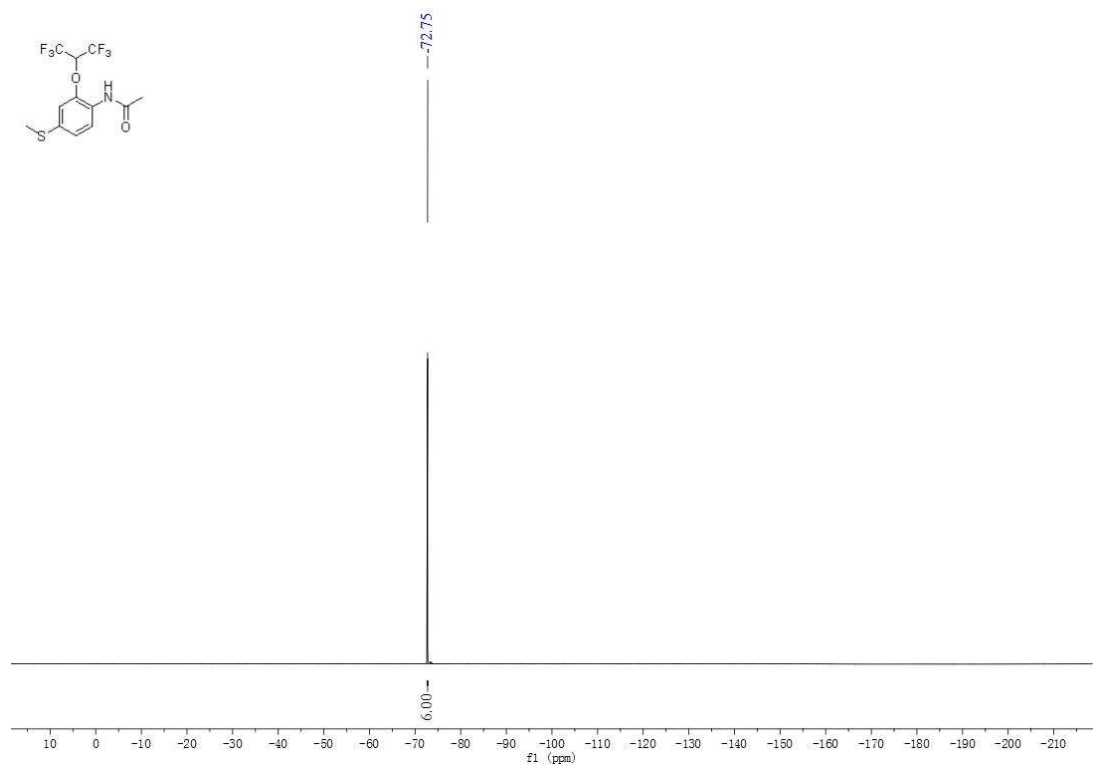

**3-((1,1,1,3,3,3-hexafluoropropan-2-yl)oxy)-2-phenylimidazo[1,2-a]pyridine (2r)**

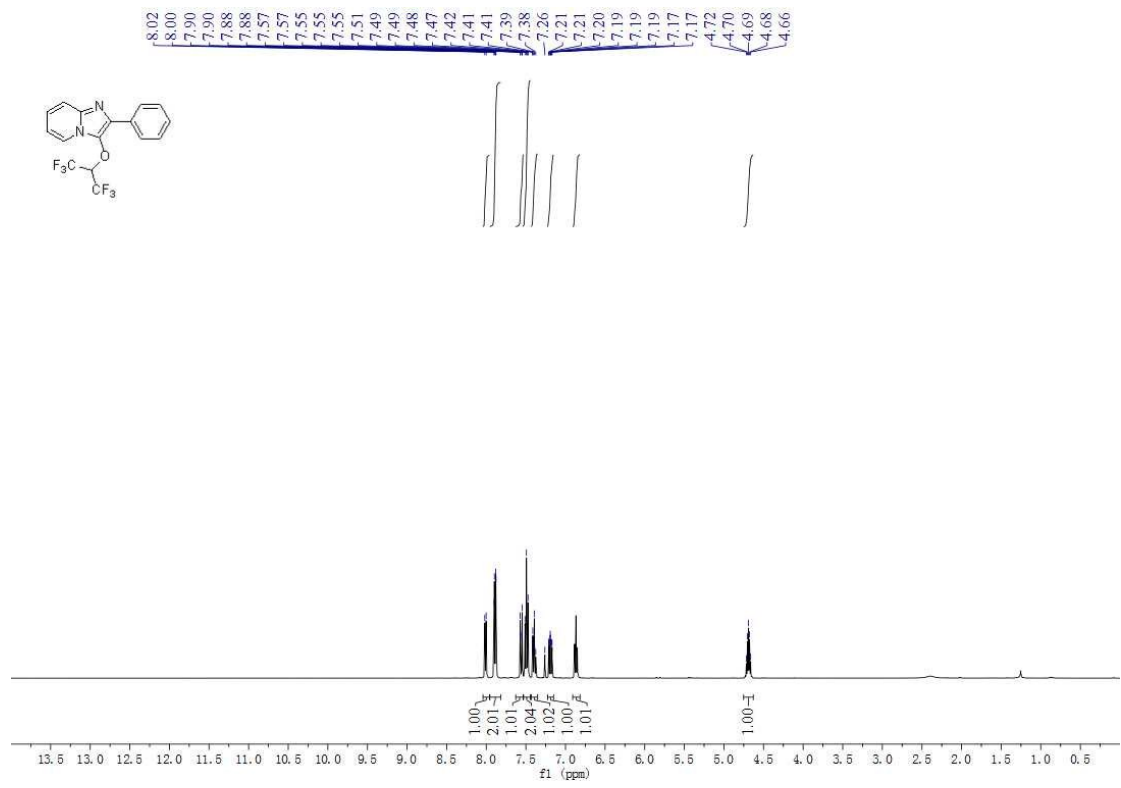

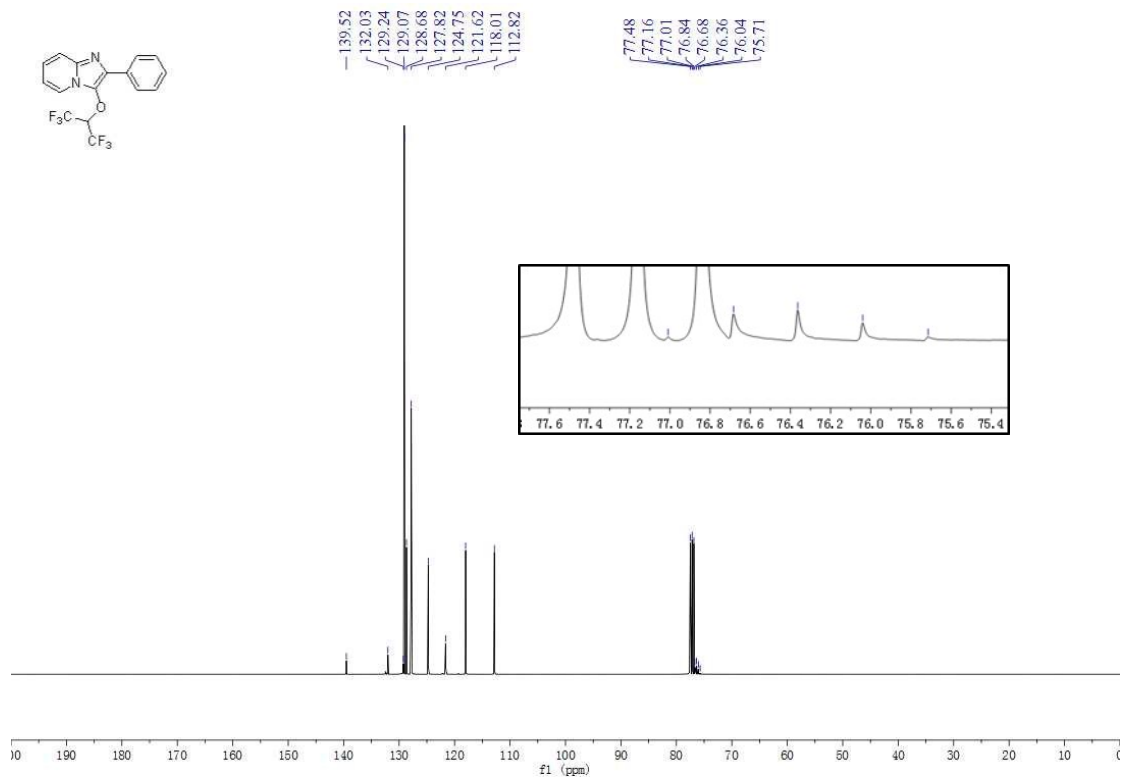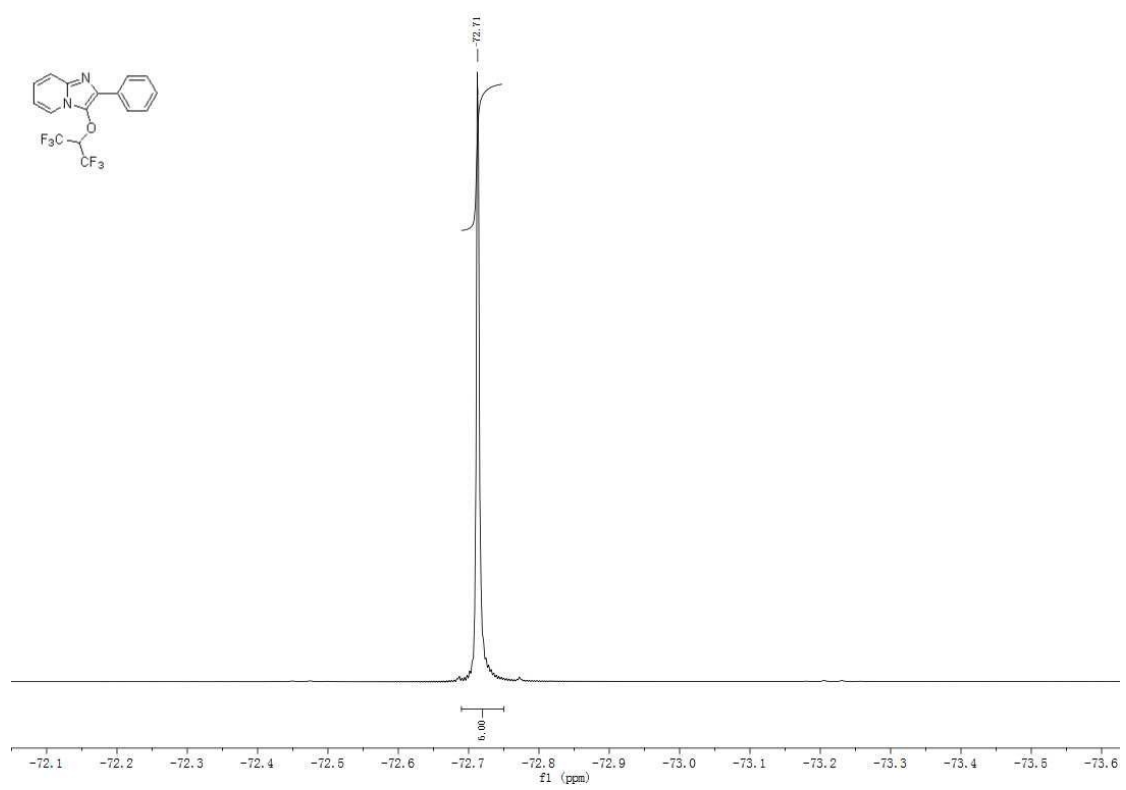

Supplement: d0ob00157k1.pdf [file d0ob00157k1.pdf]
